# Supplementary material for: Is socioeconomic status associated with dietary sodium intake in Australian children? A cross-sectional study
Source: PubMed Central journal article supplement — BMJ Open. 2013 Feb 8;3(2):e002106. doi: 10.1136/bmjopen-2012-002106 (PMC3585971; doi:10.1136/bmjopen-2012-002106), 2013-02-08
Supplement: bmjopen-2012-002106.draft_revisions.pdf [file bmjopen-2012-002106.draft_revisions.pdf]

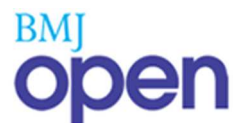

**Dietary sodium intake is associated with socioeconomic status in Australian children: a cross-sectional study**

|                                 |                                                                                                                                                                                                                                                                |
|---------------------------------|----------------------------------------------------------------------------------------------------------------------------------------------------------------------------------------------------------------------------------------------------------------|
| Journal:                        | <i>BMJ Open</i>                                                                                                                                                                                                                                                |
| Manuscript ID:                  | bmjopen-2012-002106                                                                                                                                                                                                                                            |
| Article Type:                   | Research                                                                                                                                                                                                                                                       |
| Date Submitted by the Author:   | 27-Sep-2012                                                                                                                                                                                                                                                    |
| Complete List of Authors:       | Grimes, Carley; Deakin University, Centre of Physical Activity and Nutrition Research<br>Campbell, Karen; Deakin University, CPAN<br>Riddell, Lynn; Deakin University, Centre of Physical Activity and Nutrition Sciences<br>Nowson, Caryl; Deakin University, |
| <b>Primary Subject Heading</b>: | Public health                                                                                                                                                                                                                                                  |
| Secondary Subject Heading:      | Paediatrics, Cardiovascular medicine, Epidemiology                                                                                                                                                                                                             |
| Keywords:                       | NUTRITION & DIETETICS, Community child health < PAEDIATRICS, EPIDEMIOLOGY                                                                                                                                                                                      |
|                                 |                                                                                                                                                                                                                                                                |

SCHOLARONE™  
Manuscripts

1  
2  
3 **Dietary sodium intake is associated with socioeconomic status in Australian children: a**  
4 **cross-sectional study**  
5  
6

7  
8 Carley A. Grimes<sup>1</sup>, Karen J Campbell<sup>2</sup>, Lynn J Riddell<sup>3</sup>, Caryl A. Nowson<sup>4</sup>  
9  
10

11  
12  
13  
14 <sup>1</sup> Carley A. Grimes, Centre for Physical Activity and Nutrition Research, School of Exercise  
15 and Nutrition Sciences, Deakin University, 221 Burwood Highway, Burwood, Victoria 3125,  
16  
17  
18  
19 Australia.

20  
21  
22 <sup>2</sup> Karen J. Campbell, Centre for Physical Activity and Nutrition Research, School of Exercise  
23 and Nutrition Sciences, Deakin University, 221 Burwood Highway, Burwood, Victoria 3125,  
24  
25  
26  
27 Australia.

28  
29  
30 <sup>3</sup> Lynn J Riddell, Centre for Physical Activity and Nutrition Research, School of Exercise and  
31 Nutrition Sciences, Deakin University, 221 Burwood Highway, Burwood, Victoria 3125,  
32  
33  
34  
35 Australia.

36  
37 <sup>4</sup> Caryl A. Nowson, Centre for Physical Activity and Nutrition Research, School of Exercise  
38 and Nutrition Sciences, Deakin University, 221 Burwood Highway, Burwood, Victoria 3125,  
39  
40  
41  
42  
43  
44 Australia. Tel: 613 9251 7272. Fax: 613 9244 6017. E-mail: [nowson@deakin.edu.au](mailto:nowson@deakin.edu.au)

45 **Corresponding author & Reprints:**  
46

47  
48  
49  
50  
51  
52  
53  
54  
55  
56  
57  
58  
59  
60 Carley A. Grimes, Centre for Physical Activity and Nutrition Research, School of Exercise  
and Nutrition Sciences, Deakin University, 221 Burwood Highway, Burwood, Victoria 3125,  
Australia. Tel: 613 9251 7272. Fax: 613 9244 6017. E-mail: [carley.grimes@deakin.edu.au](mailto:carley.grimes@deakin.edu.au)

**Short title:**

Dietary sodium intake and socioeconomic status in Australian children

**Key words:**

Sodium, Dietary; Sodium Chloride; Socioeconomic Status; Child; Australia

**Word count:** 2378

**Declaration of competing interests:**

All authors have completed the Unified Competing Interest form at [www.icmje.org/coi\\_disclosure.pdf](http://www.icmje.org/coi_disclosure.pdf) (available on request from the corresponding author) and declare: Carley Grimes had financial support in the form of a post graduate scholarship from the Heart Foundation, Australia for the submitted work; and had no financial relationships with any organisations that might have an interest in the submitted work in the previous three years, no other relationships or activities that could appear to have influenced the submitted work. Karen Campbell had no support from any organisation for the submitted work; no other relationships or activities that could appear to have influenced the submitted work. Caryl Nowson has received research funds from Meat & Livestock Australia; National Health and Medical Research Council, Wicking Foundation, National Heart Foundation, Australia, Helen MacPerhson Smith Trust and Red Cross Blood Bank. These payments are unrelated to the submitted work. Lynn Riddell has received research funds from Meat & Livestock Australia. These payments are unrelated to the submitted work.

**Data sharing statement:**

1  
2  
3  
4  
5  
6  
7  
8  
9  
10  
11  
12  
13  
14  
15  
16  
17  
18  
19  
20  
21  
22  
23  
24  
25  
26  
27  
28  
29  
30  
31  
32  
33  
34  
35  
36  
37  
38  
39  
40  
41  
42  
43  
44  
45  
46  
47  
48  
49  
50  
51  
52  
53  
54  
55  
56  
57  
58  
59  
60

The authors declare that on request all data files are available for analysis from the corresponding author at [carley.grimes@deakin.edu.au](mailto:carley.grimes@deakin.edu.au)

For peer review only

1  
2  
3 1 **ABSTRACT**  
4  
5

6 2 **Objective:** To assess the association between socioeconomic status (SES) and dietary sodium  
7  
8 3 intake, and identify if the major dietary sources of sodium differ by socioeconomic group in a  
9  
10 4 nationally representative sample of Australian children.  
11

12  
13 5 **Design:** Cross-sectional survey.  
14

15  
16 6 **Setting:** 2007 Australian National Children's Nutrition and Physical Activity Survey.  
17  
18

19 7 **Participants:** A total of 4487 children aged 2-16 years completed all components of the  
20  
21 8 survey.  
22  
23

24 9 **Primary and secondary outcome measures:** Sodium intake was determined via one 24-hr  
25  
26 10 dietary recall. The population proportion formula was used to identify the major sources of  
27  
28 11 dietary salt. SES was defined by the level of education attained by the primary carer. In  
29  
30 12 addition parental income was used as a secondary indicator of SES.  
31  
32

33  
34 13 **Results:** Dietary sodium intake of children of low SES background was 2576 (SEM 42) mg/d  
35  
36 14 (salt equivalent 6.6 (0.1) g/d) which was greater than children of high SES background 2370  
37  
38 15 (35) mg/d (salt 6.1 (0.09) g/d) ( $P<0.001$ ). After adjustment for age, gender, energy intake  
39  
40 16 and body mass index, low SES children consumed 195 mg/d (salt 0.5 g/d) more sodium than  
41  
42 17 high SES children ( $P<0.001$ ). Low SES children had a greater intake of sodium from  
43  
44 18 processed meat, gravies/sauces, pastries, breakfast cereals, potatoes and potato snacks (all  
45  
46 19  $P<0.05$ ).  
47  
48

49  
50 20 **Conclusion:** Australian children from a low SES background have on average a 9% greater  
51  
52 21 intake of sodium from food sources compared to those from a high SES background. This  
53  
54 22 socioeconomic patterning of salt intake may in turn influence the SES disparity seen in  
55  
56  
57  
58  
59  
60

1  
2  
3  
4  
5  
6  
7  
8  
9  
10  
11  
12  
13  
14  
15  
16  
17  
18  
19  
20  
21  
22  
23  
24  
25  
26  
27  
28  
29  
30  
31  
32  
33  
34  
35  
36  
37  
38  
39  
40  
41  
42  
43  
44  
45  
46  
47  
48  
49  
50  
51  
52  
53  
54  
55  
56  
57  
58  
59  
60

23 hypertension and cardiovascular risk in adulthood. Understanding these differences in  
24 childhood risk provide important focus for intervention.

For peer review only

1  
2  
3 25 **Article summary:**  
4  
5

6 26 **Article focus**  
7

- 8  
9 27 • To assess the association between socioeconomic status (SES) and dietary sodium intake  
10  
11 28 in Australian children and adolescents.  
12  
13  
14 29 • To determine if the major dietary sources of sodium differ by socioeconomic group.  
15  
16

17 30 **Key messages**  
18

- 19  
20 31 • In Australian children socioeconomic status is inversely associated with dietary sodium  
21  
22 32 intake.  
23  
24 25  
26 33 • Children of low socioeconomic background consumed more sodium from convenience  
27  
28 34 style foods including pies/sausage rolls; savoury sauces, fried prepared potato; processed  
29  
30 35 meat and potato crisps.  
31  
32

33 36 **Strengths and limitations of this study**  
34

- 35  
36 37 • These results are based on a large nationally representative sample of Australian children  
37  
38 38 and adolescents.  
39  
40 41  
41 39 • Sodium intake was determined via a 24-hr dietary recall and therefore does not capture the  
42  
43 40 amount of sodium derived from salt used at the table or during cooking.  
44  
45  
46 47 • The socioeconomic disparity of sodium intake reported in this study is attributable to  
47  
48 42 differences in sodium intake from food sources only. Further research is required to  
49  
50 43 understand the influence of SES on total daily sodium intake.  
51  
52  
53

54  
55 44  
56  
57  
58  
59  
60

## 45 INTRODUCTION

46 As in adults,<sup>(1)</sup> dietary sodium intake is positively associated with blood pressure in  
47 children.<sup>(2, 3)</sup> Comparable to other developed nations,<sup>(4)</sup> dietary sodium intake of Australian  
48 children is high and exceeds dietary recommendations.<sup>(5, 6)</sup> Given blood pressure follows a  
49 tracking pattern over the life course,<sup>(7, 8)</sup> it is likely that high sodium consumption during  
50 childhood increases future risk of adult hypertension and subsequent cardiovascular disease  
51 (CVD). Increased CVD risk is also observed with low SES,<sup>(9, 10)</sup> potentially due in part to  
52 differences in dietary intakes. Furthermore, prolonged inequalities of SES across the life  
53 course are likely to accumulate to overall greater CVD risk,<sup>(11, 12)</sup> A number of studies in  
54 adults<sup>(13-15)</sup> and in children and adolescents<sup>(16-20)</sup> have identified SES as a determinant of diet  
55 quality. For instance, evidence from cross-sectional studies in children and adolescents have  
56 reported a positive association between SES and fruit and vegetable intake<sup>(17, 18, 21)</sup> and  
57 conversely, lower levels of SES have been associated with poor dietary outcomes, including  
58 greater intake of high fat foods,<sup>(20)</sup> fast foods and soft drinks.<sup>(19)</sup> Studies examining the  
59 association between SES and sodium intake are scarce and inconsistent, one study in British  
60 adults found low SES was associated with higher intakes of sodium,<sup>(22)</sup> whereas in US adults  
61 there was no association between SES and sodium intake.<sup>(23)</sup> The aim of this study was to  
62 examine the association between SES and dietary sodium intake and the food sources of  
63 sodium in a nationally representative sample of Australian children aged 2-16 years.

## 65 METHODS

### 66 Study design



1  
2  
3 67 The 2007 Australian Children's Nutrition and Physical Activity Survey (CNPAS) was a  
4  
5 68 cross-sectional survey designed to collect demographic, dietary, anthropometric and physical  
6  
7 69 activity data from a nationally representative sample of children aged 2-16 years. The full  
8  
9 70 details of the sampling methodology can be found elsewhere.<sup>(24)</sup> Briefly, participants were  
10  
11 71 recruited using a multistage quota sampling framework. The initial target quota was 1000  
12  
13 72 participants for each of the following age groups; 2-3, 4-8, 9-13 and 14-16 years (50% boys  
14  
15 73 and 50% girls), to which a 400 booster sample was later provided by the state of South  
16  
17 74 Australia. The primary sampling unit was postcode and clusters of postcodes were randomly  
18  
19 75 selected as stratified by state/territory and by capital city statistical division or rest of  
20  
21 76 state/territory. Randomly selected clusters of postcodes ensured an equal number of  
22  
23 77 participants in each age group, from each of the metro and non-metro areas within each state.  
24  
25 78 Within selected postcodes Random Digit Dialling (RDD) was used to invite eligible  
26  
27 79 households, i.e. those with children aged 2-16 years, to participate in the study. Only one  
28  
29 80 child from each household could participate in the study. The response rate of eligible  
30  
31 81 children was 40%. Due to the non-proportionate nature of the sampling framework each  
32  
33 82 participant was assigned a population weighting which weighted for age, gender and region.  
34  
35 83 The study was approved by the National Health and Medical Research Council registered  
36  
37 84 Ethics Committees of Commonwealth Scientific and Industrial Research Organisation and  
38  
39 85 the University of South Australia. All participants, or where the child was aged <14 years the  
40  
41 86 primary carer, provided written consent.<sup>(24)</sup>  
42  
43  
44  
45  
46  
47  
48  
49  
50

## 51 **Assessments**

52  
53  
54 89 Demographic and food intake data was collected during a face to face computer assisted  
55  
56 90 personal interview (CAPI) completed during February and August 2007. A three-pass 24 h  
57  
58  
59  
60

1  
2  
3 91 dietary recall was used to determine all food and beverages consumed from midnight to  
4  
5 92 midnight on the day prior to the interview.<sup>(24)</sup> The primary carer of participants aged 9 years  
6  
7 93 and under provided information on dietary intake.<sup>(24)</sup> Sodium intake was calculated using the  
8  
9 94 Australian nutrient composition database AUSNUT2007, specifically developed by the Food  
10  
11 95 Standards Australia and New Zealand for the CNPAS.<sup>(25)</sup> Daily sodium (mg) intake was  
12  
13 96 converted to the salt equivalent (g) using the conversion 1 gram of sodium chloride (salt) =  
14  
15 97 390 mg sodium. Reported salt intake did not include salt added at the table or during  
16  
17 98 cooking.  
18  
19  
20  
21  
22 99

23  
24 100 The highest level of education attained by the primary carer was used to define SES. Based  
25  
26 101 on this participants were grouped into one of three categories of SES; i) high: includes those  
27  
28 102 with a university/tertiary qualification ii) mid: includes those with an advanced diploma,  
29  
30 103 diploma or certificate III/IV or trade certificate iii) low: includes those with some or no level  
31  
32 104 of high school education. Parental income was used as a secondary indicator of SES.  
33  
34 105 Reported parental income before tax was grouped into four categories i) AUD\$ 0 to \$31 999  
35  
36 106 ii) \$31 200 to \$51 999 iii) \$52 000 to \$103 999 iv)  $\geq$  \$104 000. Body weight and height were  
37  
38 107 measured using standardised protocols.<sup>(26)</sup> BMI was calculated as body weight (kg) divided  
39  
40 108 by the square of body height (m<sup>2</sup>). Participants were grouped into weight categories (very  
41  
42 109 underweight, underweight, healthy weight, overweight, obese) using the International  
43  
44 110 Obesity Task Force BMI reference cut offs for children.<sup>(27, 28)</sup>  
45  
46  
47  
48  
49  
50 111

51  
52  
53 112 **Statistical analysis**  
54  
55  
56  
57  
58  
59  
60

1  
2  
3 113 Statistical analyses were completed using STATA/SE 11 (StataCorp, College Station, Texas  
4  
5 114 USA) and PASW Statistics 17.0 (PASW Inc, Chicago, IL, USA). A *P* value of <0.05 was  
6  
7 115 considered significant. All analyses accounted for the complex survey design using the  
8  
9  
10 116 STATA svy command, specifying strata variable (region), cluster variable (post code) and  
11  
12 117 population weighting (age, gender, region). Descriptive statistics are presented as mean (SD)  
13  
14 118 or n (% weighted). To assess the association between SES, as defined by primary carer  
15  
16 119 education level, and sodium intake, multiple regression analysis was used with adjustment for  
17  
18 120 age, gender, energy intake and BMI. To further control for the effects of age, the analysis  
19  
20  
21 121 was repeated stratified by age group (i.e. 2-3; 4-8; 9-13; 14-16 years). These age categories  
22  
23 122 are consistent with those used in Australian dietary guidelines<sup>(6)</sup>. As income level is  
24  
25 123 sometimes used as a marker of SES<sup>(13)</sup> the association between parental income and sodium  
26  
27 124 intake was also examined, with adjustment for age, gender, energy intake and BMI. The  
28  
29 125 regression coefficient ( $\beta$ ) with 95% CI, corresponding *P* values and the coefficient of  
30  
31 126 determination ( $R^2$ ) are presented. In a previous analysis<sup>(29)</sup> which included the same study  
32  
33 127 population we used the population proportion formula<sup>(30)</sup> to calculate the contribution of  
34  
35 128 sodium from sub-major food group categories, as defined in the CNPAS food group coding  
36  
37 129 system.<sup>(24)</sup> For the present study, we have utilised this list which identifies the main sources  
38  
39 130 of dietary sodium, to determine if sodium intake from food group differs between low and  
40  
41 131 high SES categories, based on primary carer education level. To do this, we calculated the  
42  
43 132 mean sodium intake from each sub-major food group by SES category, and compared the  
44  
45 133 mean sodium of low to high SES, using an independent T-test.  
46  
47  
48  
49  
50  
51 134

## 54 135 RESULTS

1  
2  
3 136 Basic characteristics of the 4 487 participants are listed in **Table 1**. As defined by parental  
4  
5 137 education status, the proportion of children from low, mid and high SES background was  
6  
7 138 relatively evenly distributed. Over two thirds of children fell within the two highest income  
8  
9 139 bands. Average daily sodium intake differed by SES (**Figure 1**,  $P < 0.01$ ). Regression  
10  
11 140 analysis indicated that low SES was associated with a 195 mg/d (salt 0.5 g/d) greater intake  
12  
13 141 of sodium. The association between SES and sodium intake remained after adjustment for  
14  
15 142 age, gender, energy intake and BMI (**Table 2**). When stratified by age group the association  
16  
17 143 between sodium intake and SES remained significant between the ages of 4-13 years (**Table**  
18  
19 144 **2**), however there was no association between sodium intake and SES in 2-3 year olds or in  
20  
21 145 14-16 year olds (data not shown). There was no association between sodium intake and  
22  
23 146 parental income (data not shown), however, only 28% of children fell within the two lowest  
24  
25 147 income bands (**Table 1**)  
26  
27  
28  
29  
30 148  
31  
32  
33 149 **Table 3** lists those sub-major food groups which contributed  $>1\%$  to the groups' total daily  
34  
35 150 sodium intake. Combined these 23 food groups accounted for 84.5% of total daily sodium  
36  
37 151 intake. Regular breads and bread rolls contributed the most sodium. Moderate sources of  
38  
39 152 sodium, contributing more than 4% of total sodium intake, included mixed dishes where  
40  
41 153 cereal is the major ingredient (e.g. pizza, hamburger, sandwich, savoury rice and noodle  
42  
43 154 based dishes), processed meat, gravies and savoury sauces, pastries, cheese, and breakfast  
44  
45 155 cereals and bars. Compared to children of high SES, children of low SES had a significantly  
46  
47 156 greater intake of sodium from processed meat, gravies and savoury sauce, pastries, breakfast  
48  
49 157 cereals and bars, potatoes and potato snacks (e.g. potato crisps). The percentage difference in  
50  
51 158 sodium intake in each of these categories was 46%, 31%, 24%, 16%, 39% and 46%,  
52  
53 159 respectively (**Table 3**). Conversely, children of high SES background had a significantly  
54  
55  
56  
57  
58  
59  
60

1  
2  
3 160 greater intake of sodium from the food group containing cakes, buns, muffins, scones, cake-  
4  
5 161 type desserts; and the food group described as batter-based products (e.g. pancakes, picklets).  
6  
7 162 The percentage difference in sodium intake in each of these categories was 16% and 32%,  
8  
9 163 respectively (**Table 3**).  
10  
11  
12  
13  
14

## 165 **DISCUSSION**

166 In a nationally representative sample of Australian children aged 2-16 years, we found  
167 children of low SES background consumed 9% more dietary sodium than those of high SES  
168 background. The inverse association between sodium intake and SES was primarily driven  
169 by the association in children aged 4-13 years, particularly after adjustment for the important  
170 covariates age, gender, energy intake and BMI. In adult studies, low SES has been associated  
171 with more frequent consumption of high salt foods, such as soup, sauces, ready to eat meals,  
172 savoury seasonings, sausages and potato.<sup>(31, 32)</sup> Given parental control over children's food  
173 choices during these years, it is likely that SES disparities in adult food choices relating to  
174 high salt foods may filter down into children's eating practices. We found no association  
175 between SES and sodium intake in 2-3 and 14-16 year olds. Although some evidence  
176 indicates SES disparities in dietary patterns may be present during infancy,<sup>(33)</sup> it is possible  
177 such early differences are not seen in dietary patterns with the restricted range of food types.  
178 In the case of adolescents, as autonomy over food choices increases, other factors, such as  
179 peer-influence, taste and eating away from the home<sup>(34)</sup> may become more prominent  
180 determinants of dietary intake.

181  
51  
52  
53  
54  
55  
56  
57  
58  
59  
60

1  
2  
3 182 Using US National Health and Nutrition Examination Survey (NHANES) data, Mazur et  
4  
5 183 al.<sup>(35)</sup> explored the association of SES, as indicated by head of household education status and  
6  
7 184 household income, on sodium intake in Hispanic children aged 4-16 years. Interestingly, in  
8  
9 185 this study lower levels of education were associated with lower sodium intake<sup>(35)</sup>. This is  
10  
11 186 contrary to our own findings as well as past studies, which generally link lower SES to  
12  
13 187 overall poorer dietary outcomes.<sup>(13)</sup> We found no association between sodium intake and  
14  
15 188 level of income, however low income bands were underrepresented. This is in contrast to the  
16  
17 189 findings in Hispanic children, where low household income was associated with a greater  
18  
19 190 intake of dietary sodium.<sup>(35)</sup> In a New Zealand food survey, low cost 'home brand' labelled  
20  
21 191 food products were found to contain greater quantities of sodium than the more expensive  
22  
23 192 branded food products.<sup>(36)</sup> The impact of income on sodium intake in Australian children  
24  
25 193 remains unclear and further research is required.  
26  
27  
28  
29

30  
31 194

32  
33 195 Previous studies in children have reported socioeconomic differences in the consumption of  
34  
35 196 certain food groups.<sup>(37, 38)</sup> For example, in European children of low SES background, greater  
36  
37 197 intake of starchy foods, meat products, savoury snacks such as hamburgers, sugar and  
38  
39 198 confectionary, pizza, desserts and soft drinks have been reported.<sup>(37, 38)</sup> In the present study  
40  
41 199 those food groups which were found to contribute more sodium to the diets of low SES  
42  
43 200 children tended to include convenience style foods (i.e. pies/sausage rolls; savoury sauce and  
44  
45 201 casserole base sauces; fried prepared potato; processed meat; potato snacks). Comparably,  
46  
47 202 children of high SES background consumed greater amounts of sodium from cake and baked  
48  
49 203 type products. However, a significant amount of sodium in baked products can be in sodium  
50  
51 204 bicarbonate rather than in the form of sodium chloride. Sodium bicarbonate, unlike sodium  
52  
53 205 chloride, has not been directly associated with adverse blood pressure outcomes.<sup>(39)</sup>  
54  
55  
56  
57  
58  
59  
60

1  
2  
3 206  
4  
5  
6 207

7 With reference to sodium intake data by age group<sup>(5)</sup> and comparison to the recommended  
8 daily Upper Limit of sodium<sup>(6)</sup> it is evident that Australian children of all ages across all SES  
9 backgrounds are consuming too much dietary sodium. However, for the first time our  
10 findings indicate that socioeconomic disparities exist in sodium intake in Australian children  
11 aged 9-13 years. To reduce sodium intake in children a comprehensive approach is required,  
12 firstly targeting food policy, to encourage product reformulation of lower sodium food  
13 products across all price ranges within the food supply. Secondly, consumer education and  
14 awareness campaigns, that encourage food choices which are based on fresh products with  
15 minimal processing; this may require strategies that equip parents with enhanced food  
16 preparation skills and knowledge of the 'hidden' salt added to many commonly eaten  
17 processed foods. Furthermore, it is apparent that these strategies need to reach lower SES  
18 groups.

19  
20  
21  
22  
23  
24  
25  
26  
27  
28  
29  
30  
31  
32  
33  
34 219  
35

36 The major strengths of this study include the use of a large nationally-representative sample  
37 of Australian children, with comprehensive and standardised collection of dietary intake.  
38 Limitations of the study include the use of a 24-hr dietary recall which fails to capture the  
39 amount of salt coming from salt added at the table and during cooking and therefore is likely  
40 to underestimate the true value of salt intake.<sup>(40)</sup> The majority (77%) of dietary sodium  
41 consumed is from salt added to processed foods, whilst a smaller amount (11%) has been  
42 found to be derived from salt added at the table and during cooking.<sup>(41)</sup> In the present study,  
43 the higher intake of sodium reported in children from low SES background is attributable to  
44 differences in sodium intake from food sources only. In a previous analysis of this data, we  
45 found that children from low SES background (25%) were more likely to report adding salt at

1  
2  
3 230 the table than children from high SES (33%).<sup>(29)</sup> Thus, it is likely that children of low SES  
4  
5 231 background are consuming greater amounts of total daily sodium than reported in the present  
6  
7 232 analysis.  
8  
9

10 233

11  
12  
13 234 In summary, the findings of higher salt intakes in children of lower SES background, within  
14  
15 235 in a nationally representative sample, provides focus for concern regarding salt related  
16  
17 236 disease across the life course. This socioeconomic patterning of salt intake may in turn  
18  
19  
20 237 influence the SES disparity seen in hypertension and cardiovascular risk in adulthood. To  
21  
22 238 reduce socioeconomic inequalities in health, interventions need to begin early in life and  
23  
24 239 should include product reformulation of lower sodium food products across all price ranges,  
25  
26 240 as well as consumer education and awareness campaigns which reach low SES groups.  
27  
28

29  
30 241

31  
32  
33 242 **Contributorship statement:** The author's responsibilities were as follows – CAG, KJC, LJR  
34  
35 243 and CAN designed research; CAG performed statistical analysis and wrote the manuscript  
36  
37 244 and is guarantor of the paper; LJR, KJC and CAN helped with data interpretation, revision of  
38  
39 245 manuscript and provided significant consultation. All authors have read and approved the  
40  
41 246 final manuscript.  
42  
43

44 247 **Funding Statement:** This work was supported by a post graduate scholarship from the Heart  
45  
46 248 Foundation of Australia PP 08M 4074.  
47  
48

49  
50 249

51  
52  
53 250  
54  
55  
56  
57  
58  
59  
60



**Table 1.** Basic characteristics of Australian children and adolescents aged 2-16 years (n 487)

| Characteristic                               | n or mean | % or SD |
|----------------------------------------------|-----------|---------|
| Male (n %)                                   | 2 249     | 51      |
| Age (years) (mean SD)                        | 9.1       | 4.3     |
| Age group (n %)                              |           |         |
| 2-3 years                                    | 1071      | 12      |
| 4-8 years                                    | 1216      | 34      |
| 9-13 years                                   | 1110      | 33      |
| 14-16 years                                  | 1090      | 21      |
| Socioeconomic status (n %)*                  |           |         |
| Low SES                                      | 1414      | 30      |
| Mid SES                                      | 1583      | 36      |
| High SES                                     | 1490      | 34      |
| Parental income (n %) <sup>†</sup>           |           |         |
| \$0 to 31 999                                | 500       | 11      |
| \$32 000 to 51 999                           | 732       | 17      |
| \$52 000 to 103 999                          | 1850      | 42      |
| \$≥104 000                                   | 1169      | 30      |
| Weight status (n %) <sup>‡</sup>             |           |         |
| Underweight                                  | 212       | 5       |
| Healthy weight                               | 3267      | 72      |
| Overweight                                   | 761       | 17      |
| Obese                                        | 247       | 6       |
| Energy (kJ/d) (mean SD)                      | 8392      | 3156    |
| Sodium (mg/d) (mean SD)                      | 2473      | 1243    |
| Salt equivalent (g/d) (mean SD) <sup>§</sup> | 6.3       | 3.1     |

‡ SES as defined by the highest level of education attained by the primary carer

<sup>†</sup>Participants with missing information for parental income (n=236) excluded

1  
2  
3  
4  
5  
6  
7  
8  
9  
10  
11  
12  
13  
14  
15  
16  
17  
18  
19  
20  
21  
22  
23  
24  
25  
26  
27  
28  
29  
30  
31  
32  
33  
34  
35  
36  
37  
38  
39  
40  
41  
42  
43  
44  
45  
46  
47  
48  
49  
50  
51  
52  
53  
54  
55  
56  
57  
58  
59  
60

‡Weight classification based on the International Obesity Task Force BMI reference cut offs  
(27, 28)

§Salt equivalents (i.e. sodium chloride: 1 g = 390 mg sodium)

For peer review only

1  
2  
3 **Figure 1.** Mean sodium intake (mg/d) by socioeconomic group (n = 4487)<sup>†‡</sup>  
4  
5

6 **[JPEG IMAGE ATTACHED]**  
7  
8  
9

10  
11  
12  
13  
14  
15  
16  
17  
18 \* Significantly different from high SES ( $P < 0.001$ )  
19

20  
21 \*\* Significantly different from high SES ( $P < 0.05$ )  
22

23  
24 †SES as defined by the highest level of education attained by the primary carer  
25  
26  
27  
28  
29  
30  
31  
32  
33  
34  
35  
36  
37  
38  
39  
40  
41  
42  
43  
44  
45  
46  
47  
48  
49  
50  
51  
52  
53  
54  
55  
56  
57  
58  
59  
60

1  
2  
3  
4  
5  
6  
7  
8  
9  
10  
11  
12  
13  
14  
15  
16  
17  
18  
19  
20  
21  
22  
23  
24  
25  
26  
27  
28  
29  
30  
31  
32  
33  
34  
35  
36  
37  
38  
39  
40  
41  
42  
43  
44  
45  
46  
47  
48  
49

**Table 2.** Association between socioeconomic status (SES) and dietary sodium intake (390 mg/d) (1 g/d salt) in Australian children and adolescents aged 2-16 years (n 4 487) ¶ †

| Variable             | Total Sample (n=4 487) |         | Age group‡            |         |                       |         |
|----------------------|------------------------|---------|-----------------------|---------|-----------------------|---------|
|                      |                        |         | 4-8 years (n=1 216)   |         | 9-13 years (n=1 110)  |         |
|                      | $\beta$ (95% CI)       | P Value | $\beta$ (95% CI)      | P Value | $\beta$ (95% CI)      | P Value |
| <b>Unadjusted</b>    |                        |         |                       |         |                       |         |
| High SES (reference) |                        |         |                       |         |                       |         |
| Mid SES              | 0.3 (0.03, 0.5)        | 0.03    | 0.2 (-0.1, 0.6)       | 0.17    | 0.2 (-0.2, 0.6)       | 0.319   |
| Low SES              | 0.5 (0.3, 0.8)         | <0.001  | 0.5 (0.1, 1.0)        | 0.02    | 0.5 (-0.02, 1.0)      | 0.06    |
|                      | R <sup>2</sup> =0.004  | <0.01   | R <sup>2</sup> =0.008 | 0.05    | R <sup>2</sup> =0.004 | 0.16    |
| <b>Adjusted§</b>     |                        |         |                       |         |                       |         |

|                      |                      |        |                      |        |                      |        |
|----------------------|----------------------|--------|----------------------|--------|----------------------|--------|
| High SES (reference) |                      |        |                      |        |                      |        |
| Mid SES              | 0.2 (0.01, 0.4)      | 0.04   | 0.2 (-0.1, 0.4)      | 0.13   | 0.2 (-0.2, 0.6)      | 0.23   |
| Low SES              | 0.5 (0.2, 0.7)       | <0.001 | 0.6 (0.2, 0.9)       | 0.001  | 0.6 (0.1, 1.0)       | 0.01   |
|                      | R <sup>2</sup> =0.49 | <0.001 | R <sup>2</sup> =0.37 | <0.001 | R <sup>2</sup> =0.36 | <0.001 |

¶ Dependent variable is sodium intake in units of 390 mg/d (salt equivalent 1 g/d) and independent variable is SES entered as an indicator variable: high SES is the reference category

†SES as defined by the highest level of education attained by the primary carer

‡No association between salt intake and SES in age groups 2-3 years and 14-16 years (models not shown)

§Adjusted for gender, age, energy intake and BMI

**Table 3.** Dietary sources of sodium intake listed by their contribution to intake for the group and mean daily sodium intake by food group, by socioeconomic group¶

| Food group                                           | Total sample<br>(n 4487)                       | SES Group†               |                          |                          | P value‡    |
|------------------------------------------------------|------------------------------------------------|--------------------------|--------------------------|--------------------------|-------------|
|                                                      |                                                | Low (n 1414)             | Mid (n 1583)             | High (n 1490)            |             |
|                                                      | % contribution to total<br>daily sodium intake | Mean sodium<br>(SD) mg/d | Mean sodium<br>(SD) mg/d | Mean sodium<br>(SD) mg/d |             |
| Regular breads and bread rolls                       | 13.4                                           | 340 (315)                | 330 (300)                | 324 (317)                | 0.26        |
| Mixed dishes where cereal is the<br>major ingredient | 8.7                                            | 214 (514)                | 256 (616)                | 172 (445)                | 0.07        |
| <b>Processed meat§</b>                               | <b>7.6</b>                                     | <b>216 (464)</b>         | <b>180 (403)</b>         | <b>168 (368)</b>         | <b>0.02</b> |
| <b>Gravies and savoury sauces□</b>                   | <b>6.5</b>                                     | <b>182 (385)</b>         | <b>166 (395)</b>         | <b>139 (354)</b>         | <b>0.01</b> |
| <b>Pastries¶</b>                                     | <b>4.9</b>                                     | <b>135 (400)</b>         | <b>120 (352)</b>         | <b>109 (345)</b>         | <b>0.03</b> |

|                                                                 |            |                  |                  |                 |             |
|-----------------------------------------------------------------|------------|------------------|------------------|-----------------|-------------|
| Cheese                                                          | 4.6        | 114 (209)        | 110 (190)        | 116 (186)       | 0.80        |
| <b>Breakfast cereals and bars</b>                               | <b>4.2</b> | <b>113 (176)</b> | <b>101 (166)</b> | <b>97 (161)</b> | <b>0.03</b> |
| Dairy milk                                                      | 3.9        | 95 (106)         | 94 (103)         | 100 (98)        | 0.25        |
| Herbs, spices, seasonings and<br>stock cubes                    | 3.7        | 114 (482)        | 75 (246)         | 90 (301)        | 0.31        |
| Sausages, frankfurts and saveloys                               | 2.9        | 79 (259)         | 74 (136)         | 61 (201)        | 0.07        |
| Mixed dishes where poultry/game<br>is the major component       | 2.6        | 79 (268)         | 59 (194)         | 60 (238)        | 0.09        |
| Soup (prepared, ready to eat)                                   | 2.6        | 51 (288)         | 74 (379)         | 65 (282)        | 0.25        |
| English-style muffins, flat breads,<br>and savoury sweet breads | 2.4        | 55 (158)         | 58 (180)         | 67 (181)        | 0.17        |
| <b>Cakes, buns, muffins, scones,</b>                            | <b>2.3</b> | <b>54 (153)</b>  | <b>52 (144)</b>  | <b>68 (176)</b> | <b>0.02</b> |

---

| <b>cake-type desserts</b>                                       |            |                 |                 |                 |             |
|-----------------------------------------------------------------|------------|-----------------|-----------------|-----------------|-------------|
| Savoury biscuits                                                | 2.2        | 49 (136)        | 57 (147)        | 57 (152)        | 0.34        |
| Yeast, yeast, vegetable and meat<br>extracts                    | 2.0        | 47 (117)        | 55 (143)        | 45 (108)        | 0.70        |
| <b>Potatoes</b> ¶ ¶ ¶                                           | <b>1.9</b> | <b>53 (128)</b> | <b>51 (127)</b> | <b>38 (106)</b> | <b>0.01</b> |
| <b>Batter-based products</b> ††                                 | <b>1.7</b> | <b>38 (161)</b> | <b>37 (150)</b> | <b>50 (180)</b> | <b>0.05</b> |
| <b>Potato snacks</b>                                            | <b>1.7</b> | <b>51 (149)</b> | <b>40 (121)</b> | <b>35 (125)</b> | <b>0.03</b> |
| Pasta and pasta products                                        | 1.4        | 35 (142)        | 32 (130)        | 35 (138)        | 0.89        |
| Sweet biscuits                                                  | 1.2        | 29 (64)         | 33 (72)         | 27 (62)         | 0.61        |
| Mixed dishes where beef, veal or<br>lamb is the major component | 1.1        | 32 (175)        | 21 (116)        | 28 (56)         | 0.53        |
| Mature legumes and pulse                                        | 1.0        | 21 (149)        | 21 (137)        | 35 (258)        | 0.12        |

---



1  
2  
3  
4  
5 products and dishes  
6  
7

---

8 ¶ Includes those sub-major food group categories that contribute >1.0% of sodium to daily intake ambiguous  
9

10  
11 †SES as defined by the highest level of education attained by the primary carer  
12

13  
14 ‡Means are compared between low and high SES groups using independent T-test  
15

16  
17 §includes ham, bacon and processed delicatessen meat  
18

19  
20 □includes pasta sauces and casserole bases  
21

22  
23 ¶includes pies and sausage rolls  
24

25  
26 ¶ ¶ includes potato gems and wedges  
27

28  
29 ††includes pancakes and pikelets  
30  
31  
32  
33  
34  
35  
36  
37  
38  
39  
40  
41  
42  
43  
44  
45  
46  
47  
48  
49

1  
2  
3  
4  
5  
6  
7  
8  
9  
10  
11  
12  
13  
14  
15  
16  
17  
18  
19  
20  
21  
22  
23  
24  
25  
26  
27  
28  
29  
30  
31  
32  
33  
34  
35  
36  
37  
38  
39  
40  
41  
42  
43  
44  
45  
46  
47  
48  
49  
50  
51  
52  
53  
54  
55  
56  
57  
58  
59  
60

For peer review only

**REFERENCES**

1. Dickinson BD, Havas S. Reducing the population burden of cardiovascular disease by reducing sodium intake. *Arch Intern Med* 2007;**167**:1460-68.
2. He FJ, MacGregor GA. Importance of Salt in Determining Blood Pressure in Children Meta-Analysis of Controlled Trials. *Hypertension* 2006;**48**:861-69.
3. He FJ, Marrero NM, MacGregor GA. Salt and blood pressure in children and adolescents. *J Hum Hyperten* 2008;**22**:4-11.
4. Brown IJ, Tzoulaki I, Candeias V, et al. Salt intakes around the world: implications for public health. *Int J Epidemiol* 2009;**38**:791-813.
5. Department of Health and Ageing., Australian Food and Grocery Council., Department of Agriculture Fisheries and Forestry. 2007 Australian National Children's Nutrition and Physical Activity Survey - Main Findings. Canberra: Commonwealth of Australia, 2008. Available from:  
[http://www.health.gov.au/internet/main/publishing.nsf/content/66596E8FC68FD1A3CA2574D50027DB86/\\$File/childrens-nut-phys-survey.pdf](http://www.health.gov.au/internet/main/publishing.nsf/content/66596E8FC68FD1A3CA2574D50027DB86/$File/childrens-nut-phys-survey.pdf).
6. National Health and Medical Research Council. Nutrient reference values for Australia and New Zealand. Canberra: Australian Government. Department of Health and Ageing, 2006. Available from:  
[http://www.nhmrc.gov.au/files\\_nhmrc/publications/attachments/n35.pdf](http://www.nhmrc.gov.au/files_nhmrc/publications/attachments/n35.pdf).
7. Chen X, Wang Y. Tracking of blood pressure from childhood to adulthood A systematic review and meta-regression analysis. *Circulation* 2008;**117**:3171-80.
8. Toschke AM, Kohl L, Mansmann U, et al. Meta-analysis of blood pressure tracking from childhood to adulthood and implications for the design of intervention trials. *Acta Paediatrica* 2010;**99**:24-29.

- 1  
2  
3 9. Kaplan GA, Keil JE. Socioeconomic factors and cardiovascular disease: a review of the  
4  
5 literature. *Circulation* 1993;**88**:1973-98.  
6
- 7  
8 10. Rosengren A, Subramanian SV, Islam S, et al. Education and risk for acute myocardial  
9  
10 infarction in 52 high, middle and low-income countries: INTERHEART case-control  
11  
12 study. *Heart* 2009;**95**:2014-22.  
13
- 14 11. Loucks EB, Lynch JW, Pilote L, et al. Life-course socioeconomic position and incidence  
15  
16 of coronary heart disease: the Framingham Offspring Study. *Am J Epidemiol*  
17  
18 2009;**169**:829-36.  
19
- 20 12. Pollitt RA, Rose KM, Kaufman JS. Evaluating the evidence for models of life course  
21  
22 socioeconomic factors and cardiovascular outcomes: a systematic review. *BMC*  
23  
24 *Public Health* 2005;**5**:7.  
25  
26
- 27 13. Darmon N, Drewnowski A. Does social class predict diet quality? *Am J Clin Nutr*  
28  
29 2008;**87**:1107-17.  
30
- 31 14. Giskes K, Turrell G, Patterson C, et al. Socio-economic differences in fruit and vegetable  
32  
33 consumption among Australian adolescents and adults. *Public Health Nutr*  
34  
35 2002;**5**:663-69.  
36  
37
- 38 15. Hulshof KFAM, Brussaard JH, Kruijzinga AG, et al. Socio-economic status, dietary intake  
39  
40 and 10 y trends: the Dutch National Food Consumption Survey. *Eur J Clin Nutr*  
41  
42 2003;**57**:128-37.  
43  
44
- 45 16. Ambrosini GL, Oddy WH, Robinson M, et al. Adolescent dietary patterns are associated  
46  
47 with lifestyle and family psycho-social factors. *Public Health Nutr* 2009;**12**:1807-15.  
48
- 49 17. Haapalahti M, Mykkanen H, Tikkanen S, et al. Meal patterns and food use in 10- to 11-  
50  
51 year old Finnish children. *Public Health Nutr* 2002;**6**:365-70.  
52  
53
- 54 18. Neumark-Sztainer D, Wall M, Perry C, et al. Correlates of fruit and vegetable intake  
55  
56 among adolescents Findings from Project EAT. *Prev Med* 2003;**37**:198-208.  
57  
58

- 1  
2  
3 19. Utter J, Denny S, Crengle S, et al. Socio-economic differences in eating-related attitudes,  
4 behaviours and environments of adolescents. *Public Health Nutr* 2010;**14**:629-34.  
5  
6  
7 20. Wardle J, Jarvis MJ, Steggle N, et al. Socioeconomic disparities in cancer-risk  
8 behaviours in adolescence: baseline results from the Health and Behaviour in  
9 Teenagers Study (HABITS). *Prev Med* 2003;**36**:721-30.  
10  
11  
12 21. Dubois L, Farmer A, Girard M, et al. Demographic and socio-economic factors related to  
13 food intake and adherence to nutritional recommendations in a cohort of pre-school  
14 children. *Public Health Nutr* 2011;**14**:1096-104.  
15  
16  
17 22. Bates CJ, Prentice A, Cole TJ, et al. Micronutrients: highlights and research challenges  
18 from the 1994–5 National Diet and Nutrition Survey of people aged 65 years and  
19 over. *Brit J Nutr* 1999;**82**:7-15.  
20  
21  
22 23. Gerber AM, James SA, Ammerman AS, et al. Socioeconomic status and electrolyte  
23 intake in black adults: the Pitt country Study. *Am J Public Health* 1991;**81**:1608-12.  
24  
25  
26 24. Department of Health and Ageing. User guide 2007 Australian National Children's  
27 Nutrition and Physical Activity Survey. Canberra: Commonwealth of Australia, 2010.  
28 Available from:  
29 [http://www.health.gov.au/internet/main/publishing.nsf/Content/AC3F256C715674D5](http://www.health.gov.au/internet/main/publishing.nsf/Content/AC3F256C715674D5CA2574D60000237D/$File/user-guide-v2.pdf)  
30 [CA2574D60000237D/\\$File/user-guide-v2.pdf](http://www.health.gov.au/internet/main/publishing.nsf/Content/AC3F256C715674D5CA2574D60000237D/$File/user-guide-v2.pdf).  
31  
32  
33 25. Food Standards Australian and New Zealand [Internet]. Canberra: Food Standards  
34 Australia and New Zealand; [cited 2009 Jan 23]. Available from:  
35 <http://www.foodstandards.gov.au/consumerinformation/ausnut2007/>.  
36  
37  
38 26. Marfell-Jones M, Olds T, Stewart A, et al. International standards for anthropometric  
39 assessment. Potchefstroom, South Africa: International standards for anthropometric  
40 assessment (ISAK), 2006. Available from:  
41  
42  
43  
44  
45  
46  
47  
48  
49  
50  
51  
52  
53  
54  
55  
56  
57  
58  
59  
60

- 1  
2  
3 27. Cole TJ. Establishing a standard definition for child overweight and obesity worldwide:  
4  
5 international survey. *Br Med J* 2000;**320**:1-6.  
6  
7 28. Cole TJ, Flegal KM, Nicholls D, et al. Body mass index cut offs to define thinness in  
8  
9 children and adolescents: international survey. *Brit Med J* 2007;**335**:194-7.  
10  
11 29. Grimes CA, Campbell KJ, Riddell LJ, et al. Sources of sodium in Australian children's  
12  
13 diets and the effect of the application of sodium targets to food products to reduce  
14  
15 sodium intake. *Br J Nutr* 2011;**105**:468-77.  
16  
17 30. Krebs-Smith SM, Kott PS, Guenther PM. Mean proportion and population proportion:  
18  
19 two answers to the same question? *J Am Diet Assoc* 1989;**89**:667-72.  
20  
21 31. Purdy J, Armstrong G, McIlveen H. The influence of socio-economic status on salt  
22  
23 consumption in Northern Ireland. *International Journal of Consumer Studies*  
24  
25 2002;**26**:71-80.  
26  
27 32. Van der Veen JE, Graaf CD, Van Dis SJ, et al. Determinants of salt use in cooked meals  
28  
29 in the Netherlands: attitudes and practices of food preparers. *Eur J Clin Nutr*  
30  
31 1999;**53**:388-94.  
32  
33 33. Okubo H, Miyake Y, Sasaki S, et al. Dietary patterns in infancy and their associations  
34  
35 with maternal socio-economic and lifestyle factors among 758 Japanese mother-child  
36  
37 pairs: the Osaka Maternal and Child Health Study. *Matern Child Nutr* 2012;**doi:**  
38  
39 **10.1111/j.1740-8709.2012.00403.x**. Epub 2012 Mar 29.  
40  
41 34. Story M, Neumark-Sztainer D, French S. Individual and environmental influences on  
42  
43 adolescent eating behaviours. *J Am Diet Assoc* 2002;**102**:S40-S51.  
44  
45 35. Mazur RE, Marquis GS, Jensen HH. Diet and food insufficiency among Hispanic youths:  
46  
47 acculturation and socioeconomic factors in the third National Health and Nutrition  
48  
49 Examination Survey. *Am J Clin Nutr* 2003;**78**:1120-27.  
50  
51  
52  
53  
54  
55  
56  
57  
58  
59  
60

- 1  
2  
3 36. Monro D, Young L, Wilson J, et al. The sodium content of low cost and private label  
4  
5 foods; implications for public health. *Journal of the New Zealand Dietetic Association*  
6  
7 2004;**58**:4-10.  
8  
9  
10 37. Lioret S, Dubuisson C, Dufour A, et al. Trends in food intake in French children from  
11  
12 1999 to 2007: results from the INCA (etude Individuelle Nationale des  
13  
14 Consommations Alimentaires) dietary surveys. *Brit J Nutr* 2010;**103**:585-601.  
15  
16 38. Sausenthaler S, Standl M, Buyken A, et al. Regional and socio-economic differences in  
17  
18 food, nutrient and supplement intake in school-age children in Germany: results from  
19  
20 the GINIplus and the LISApplus studies. *Public Health Nutr* 2011;**10**:1724-35.  
21  
22 39. McCarty MF. Should we restrict chloride rather than sodium? *Med Hypotheses*  
23  
24 2004;**63**:138-48.  
25  
26 40. Loria CM, Obarzanek E, Ernst ND. The Dietary Guidelines: Surveillance Issues and  
27  
28 Research Needs. Choose and Prepare Foods with Less Salt: Dietary Advice for All  
29  
30 Americans. *J Nutr* 2001;**131**:536S-51S.  
31  
32 41. Mattes RD, Donnelly D. Relative contributions of dietary sodium sources. *J Am Coll*  
33  
34 *Nutr* 1991;**10**:383-93.  
35  
36  
37  
38  
39  
40  
41  
42  
43  
44  
45  
46  
47  
48  
49  
50  
51  
52  
53  
54  
55  
56  
57  
58  
59  
60

1  
2  
3  
4  
5  
6  
7  
8  
9  
10  
11  
12  
13  
14  
15  
16  
17  
18  
19  
20  
21  
22  
23  
24  
25  
26  
27  
28  
29  
30  
31  
32  
33  
34  
35  
36  
37  
38  
39  
40  
41  
42  
43  
44  
45  
46  
47  
48  
49  
50  
51  
52  
53  
54  
55  
56  
57  
58  
59  
60

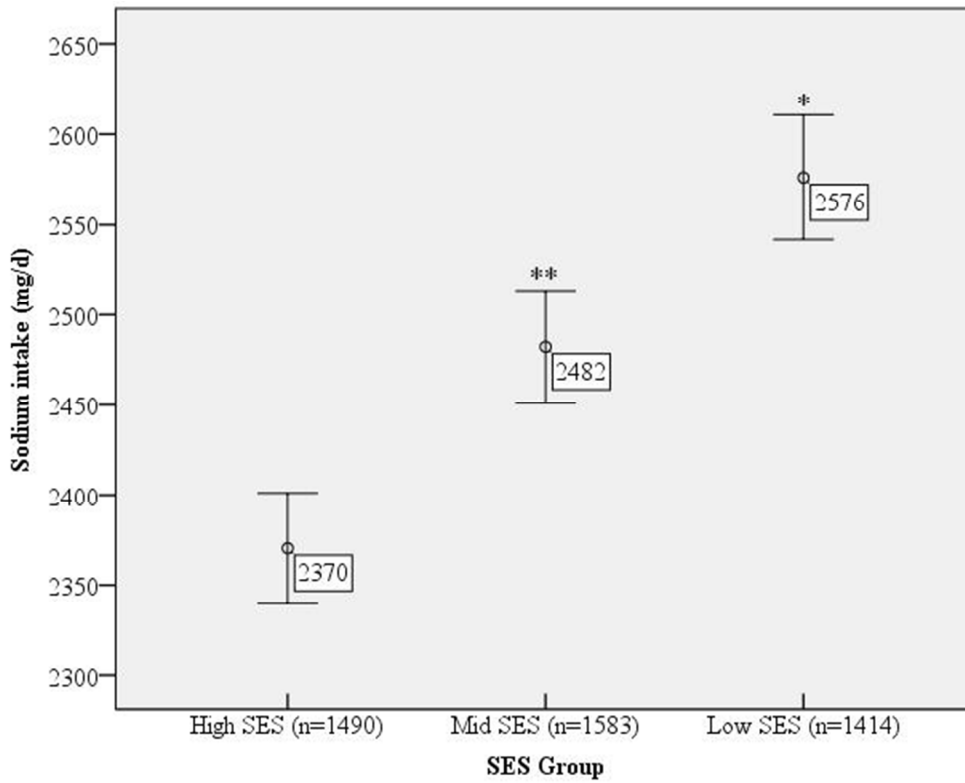

\* Significantly different from high SES (P <0.001)  
\*\* Significantly different from high SES (P <0.05)  
†SES as defined by the highest level of education attained by the primary carer  
220x176mm (72 x 72 DPI)

view only



## STROBE Statement—checklist of items that should be included in reports of observational studies

|                              | Item No | Recommendation                                                                                                                                                                                                                                                                                                                                                                                                                                                                                                                                                                                                                                                                                   |
|------------------------------|---------|--------------------------------------------------------------------------------------------------------------------------------------------------------------------------------------------------------------------------------------------------------------------------------------------------------------------------------------------------------------------------------------------------------------------------------------------------------------------------------------------------------------------------------------------------------------------------------------------------------------------------------------------------------------------------------------------------|
| <b>Title and abstract</b>    | 1       | (a) Indicate the study's design with a commonly used term in the title or the abstract<br>(b) Provide in the abstract an informative and balanced summary of what was done and what was found                                                                                                                                                                                                                                                                                                                                                                                                                                                                                                    |
| <b>Introduction</b>          |         |                                                                                                                                                                                                                                                                                                                                                                                                                                                                                                                                                                                                                                                                                                  |
| Background/rationale         | 2       | Explain the scientific background and rationale for the investigation being reported                                                                                                                                                                                                                                                                                                                                                                                                                                                                                                                                                                                                             |
| Objectives                   | 3       | State specific objectives, including any prespecified hypotheses                                                                                                                                                                                                                                                                                                                                                                                                                                                                                                                                                                                                                                 |
| <b>Methods</b>               |         |                                                                                                                                                                                                                                                                                                                                                                                                                                                                                                                                                                                                                                                                                                  |
| Study design                 | 4       | Present key elements of study design early in the paper                                                                                                                                                                                                                                                                                                                                                                                                                                                                                                                                                                                                                                          |
| Setting                      | 5       | Describe the setting, locations, and relevant dates, including periods of recruitment, exposure, follow-up, and data collection                                                                                                                                                                                                                                                                                                                                                                                                                                                                                                                                                                  |
| Participants                 | 6       | (a) <i>Cohort study</i> —Give the eligibility criteria, and the sources and methods of selection of participants. Describe methods of follow-up<br><i>Case-control study</i> —Give the eligibility criteria, and the sources and methods of case ascertainment and control selection. Give the rationale for the choice of cases and controls<br><i>Cross-sectional study</i> —Give the eligibility criteria, and the sources and methods of selection of participants<br>(b) <i>Cohort study</i> —For matched studies, give matching criteria and number of exposed and unexposed<br><i>Case-control study</i> —For matched studies, give matching criteria and the number of controls per case |
| Variables                    | 7       | Clearly define all outcomes, exposures, predictors, potential confounders, and effect modifiers. Give diagnostic criteria, if applicable                                                                                                                                                                                                                                                                                                                                                                                                                                                                                                                                                         |
| Data sources/<br>measurement | 8*      | For each variable of interest, give sources of data and details of methods of assessment (measurement). Describe comparability of assessment methods if there is more than one group                                                                                                                                                                                                                                                                                                                                                                                                                                                                                                             |
| Bias                         | 9       | Describe any efforts to address potential sources of bias                                                                                                                                                                                                                                                                                                                                                                                                                                                                                                                                                                                                                                        |
| Study size                   | 10      | Explain how the study size was arrived at                                                                                                                                                                                                                                                                                                                                                                                                                                                                                                                                                                                                                                                        |
| Quantitative variables       | 11      | Explain how quantitative variables were handled in the analyses. If applicable, describe which groupings were chosen and why                                                                                                                                                                                                                                                                                                                                                                                                                                                                                                                                                                     |
| Statistical methods          | 12      | (a) Describe all statistical methods, including those used to control for confounding<br>(b) Describe any methods used to examine subgroups and interactions<br>(c) Explain how missing data were addressed<br>(d) <i>Cohort study</i> —If applicable, explain how loss to follow-up was addressed<br><i>Case-control study</i> —If applicable, explain how matching of cases and controls was addressed<br><i>Cross-sectional study</i> —If applicable, describe analytical methods taking account of sampling strategy<br>(e) Describe any sensitivity analyses                                                                                                                                |

Continued on next page

1  
2  
3  
4  
5  
6  
7  
8  
9  
10  
11  
12  
13  
14  
15  
16  
17  
18  
19  
20  
21  
22  
23  
24  
25  
26  
27  
28  
29  
30  
31  
32  
33  
34  
35  
36  
37  
38  
39  
40  
41  
42  
43  
44  
45  
46  
47  
48  
49  
50  
51  
52  
53  
54  
55  
56  
57  
58  
59  
60

## Results

|                  |     |                                                                                                                                                                                                                                                                                                                                                                                                               |
|------------------|-----|---------------------------------------------------------------------------------------------------------------------------------------------------------------------------------------------------------------------------------------------------------------------------------------------------------------------------------------------------------------------------------------------------------------|
| Participants     | 13* | (a) Report numbers of individuals at each stage of study—eg numbers potentially eligible, examined for eligibility, confirmed eligible, included in the study, completing follow-up, and analysed<br>(b) Give reasons for non-participation at each stage<br>(c) Consider use of a flow diagram                                                                                                               |
| Descriptive data | 14* | (a) Give characteristics of study participants (eg demographic, clinical, social) and information on exposures and potential confounders<br>(b) Indicate number of participants with missing data for each variable of interest<br>(c) <i>Cohort study</i> —Summarise follow-up time (eg, average and total amount)                                                                                           |
| Outcome data     | 15* | <i>Cohort study</i> —Report numbers of outcome events or summary measures over time<br><i>Case-control study</i> —Report numbers in each exposure category, or summary measures of exposure<br><i>Cross-sectional study</i> —Report numbers of outcome events or summary measures                                                                                                                             |
| Main results     | 16  | (a) Give unadjusted estimates and, if applicable, confounder-adjusted estimates and their precision (eg, 95% confidence interval). Make clear which confounders were adjusted for and why they were included<br>(b) Report category boundaries when continuous variables were categorized<br>(c) If relevant, consider translating estimates of relative risk into absolute risk for a meaningful time period |
| Other analyses   | 17  | Report other analyses done—eg analyses of subgroups and interactions, and sensitivity analyses                                                                                                                                                                                                                                                                                                                |

## Discussion

|                  |    |                                                                                                                                                                            |
|------------------|----|----------------------------------------------------------------------------------------------------------------------------------------------------------------------------|
| Key results      | 18 | Summarise key results with reference to study objectives                                                                                                                   |
| Limitations      | 19 | Discuss limitations of the study, taking into account sources of potential bias or imprecision. Discuss both direction and magnitude of any potential bias                 |
| Interpretation   | 20 | Give a cautious overall interpretation of results considering objectives, limitations, multiplicity of analyses, results from similar studies, and other relevant evidence |
| Generalisability | 21 | Discuss the generalisability (external validity) of the study results                                                                                                      |

## Other information

|         |    |                                                                                                                                                               |
|---------|----|---------------------------------------------------------------------------------------------------------------------------------------------------------------|
| Funding | 22 | Give the source of funding and the role of the funders for the present study and, if applicable, for the original study on which the present article is based |
|---------|----|---------------------------------------------------------------------------------------------------------------------------------------------------------------|

\*Give information separately for cases and controls in case-control studies and, if applicable, for exposed and unexposed groups in cohort and cross-sectional studies.

**Note:** An Explanation and Elaboration article discusses each checklist item and gives methodological background and published examples of transparent reporting. The STROBE checklist is best used in conjunction with this article (freely available on the Web sites of PLoS Medicine at <http://www.plosmedicine.org/>, Annals of Internal Medicine at <http://www.annals.org/>, and Epidemiology at <http://www.epidem.com/>). Information on the STROBE Initiative is available at [www.strobe-statement.org](http://www.strobe-statement.org).



**Is socioeconomic status associated with dietary sodium intake in Australian children? A cross-sectional study**

|                                 |                                                                                                                                                                                                                                                                |
|---------------------------------|----------------------------------------------------------------------------------------------------------------------------------------------------------------------------------------------------------------------------------------------------------------|
| Journal:                        | <i>BMJ Open</i>                                                                                                                                                                                                                                                |
| Manuscript ID:                  | bmjopen-2012-002106.R1                                                                                                                                                                                                                                         |
| Article Type:                   | Research                                                                                                                                                                                                                                                       |
| Date Submitted by the Author:   | 12-Dec-2012                                                                                                                                                                                                                                                    |
| Complete List of Authors:       | Grimes, Carley; Deakin University, Centre of Physical Activity and Nutrition Research<br>Campbell, Karen; Deakin University, CPAN<br>Riddell, Lynn; Deakin University, Centre of Physical Activity and Nutrition Sciences<br>Nowson, Caryl; Deakin University, |
| <b>Primary Subject Heading</b>: | Public health                                                                                                                                                                                                                                                  |
| Secondary Subject Heading:      | Paediatrics, Cardiovascular medicine, Epidemiology                                                                                                                                                                                                             |
| Keywords:                       | NUTRITION & DIETETICS, Community child health < PAEDIATRICS, EPIDEMIOLOGY                                                                                                                                                                                      |
|                                 |                                                                                                                                                                                                                                                                |

SCHOLARONE™  
Manuscripts

1  
2  
3  
4  
5  
6 **Is socioeconomic status associated with dietary sodium intake in Australian children? A**  
7  
8 **cross-sectional study**  
9

10  
11 Carley A. Grimes<sup>1</sup>, Karen J Campbell<sup>2</sup>, Lynn J Riddell<sup>3</sup>, Caryl A. Nowson<sup>4</sup>  
12  
13

14  
15  
16  
17 <sup>1</sup> Carley A. Grimes, Centre for Physical Activity and Nutrition Research, School of Exercise  
18 and Nutrition Sciences, Deakin University, 221 Burwood Highway, Burwood, Victoria 3125,  
19  
20  
21  
22 Australia.  
23

24  
25 <sup>2</sup> Karen J. Campbell, Centre for Physical Activity and Nutrition Research, School of Exercise  
26 and Nutrition Sciences, Deakin University, 221 Burwood Highway, Burwood, Victoria 3125,  
27  
28  
29  
30 Australia.  
31

32  
33 <sup>3</sup> Lynn J Riddell, Centre for Physical Activity and Nutrition Research, School of Exercise and  
34 Nutrition Sciences, Deakin University, 221 Burwood Highway, Burwood, Victoria 3125,  
35  
36  
37  
38 Australia.  
39

40  
41 <sup>4</sup> Caryl A. Nowson, Centre for Physical Activity and Nutrition Research, School of Exercise  
42 and Nutrition Sciences, Deakin University, 221 Burwood Highway, Burwood, Victoria 3125,  
43  
44  
45  
46 Australia. Tel: 613 9251 7272. Fax: 613 9244 6017. E-mail: [nowson@deakin.edu.au](mailto:nowson@deakin.edu.au)  
47

48 **Corresponding author & Reprints:**  
49

50  
51 Carley A. Grimes, Centre for Physical Activity and Nutrition Research, School of Exercise  
52 and Nutrition Sciences, Deakin University, 221 Burwood Highway, Burwood, Victoria 3125,  
53  
54  
55  
56 Australia. Tel: 613 9251 7272. Fax: 613 9244 6017. E-mail: [carley.grimes@deakin.edu.au](mailto:carley.grimes@deakin.edu.au)  
57

**Short title:**

Dietary sodium intake and socioeconomic status in Australian children

**Key words:**

Sodium, Dietary; Sodium Chloride; Socioeconomic Status; Child; Australia

**Word count:** 2378

**Declaration of competing interests:**

All authors have completed the Unified Competing Interest form at [www.icmje.org/coi\\_disclosure.pdf](http://www.icmje.org/coi_disclosure.pdf) (available on request from the corresponding author) and declare: Carley Grimes had financial support in the form of a post graduate scholarship from the Heart Foundation, Australia for the submitted work; and had no financial relationships with any organisations that might have an interest in the submitted work in the previous three years, no other relationships or activities that could appear to have influenced the submitted work. Karen Campbell had no support from any organisation for the submitted work; no other relationships or activities that could appear to have influenced the submitted work. Caryl Nowson has received research funds from Meat & Livestock Australia; National Health and Medical Research Council, Wicking Foundation, National Heart Foundation, Australia, Helen MacPerhson Smith Trust and Red Cross Blood Bank. These payments are unrelated to the submitted work. Lynn Riddell has received research funds from Meat & Livestock Australia. These payments are unrelated to the submitted work.

1  
2  
3  
4  
5  
6  
7  
8  
9  
10  
11  
12  
13  
14  
15  
16  
17  
18  
19  
20  
21  
22  
23  
24  
25  
26  
27  
28  
29  
30  
31  
32  
33  
34  
35  
36  
37  
38  
39  
40  
41  
42  
43  
44  
45  
46  
47  
48  
49  
50  
51  
52  
53  
54  
55  
56  
57  
58  
59  
60

**Data sharing statement:**

The authors declare that on request all data files are available for analysis from the corresponding author at [carley.grimes@deakin.edu.au](mailto:carley.grimes@deakin.edu.au)

For peer review only

1  
2  
3 **1 ABSTRACT**  
4

5  
6 **2 Objective:** To assess the association between socioeconomic status (SES) and dietary sodium  
7  
8 intake, and identify if the major dietary sources of sodium differ by socioeconomic group in a  
9  
10 nationally representative sample of Australian children.  
11

12  
13 **5 Design:** Cross-sectional survey.  
14

15  
16 **6 Setting:** 2007 Australian National Children's Nutrition and Physical Activity Survey.  
17  
18

19  
20 **7 Participants:** A total of 4487 children aged 2-16 years completed all components of the  
21  
22 survey.  
23

24  
25 **9 Primary and secondary outcome measures:** Sodium intake was determined via one 24-hr  
26  
27 dietary recall. The population proportion formula was used to identify the major sources of  
28  
29 dietary salt. SES was defined by the level of education attained by the primary carer. In  
30  
31 addition parental income was used as a secondary indicator of SES.  
32  
33

34  
35 **13 Results:** Dietary sodium intake of children of low SES background was 2576 (SEM 42) mg/d  
36  
37 (salt equivalent 6.6 (0.1) g/d) which was greater than children of high SES background 2370  
38  
39 (35) mg/d (salt 6.1 (0.09) g/d) ( $P<0.001$ ). After adjustment for age, gender, energy intake  
40  
41 and body mass index, low SES children consumed 195 mg/d (salt 0.5 g/d) more sodium than  
42  
43 high SES children ( $P<0.001$ ). Low SES children had a greater intake of sodium from  
44  
45 processed meat, gravies/sauces, pastries, breakfast cereals, potatoes and potato snacks (all  
46  
47  $P<0.05$ ).  
48  
49

50  
51 **20 Conclusion:** Australian children from a low SES background have on average a 9% greater  
52  
53 intake of sodium from food sources compared to those from a high SES background.  
54  
55

1  
2  
3  
4  
5  
6  
7  
8  
9  
10  
11  
12  
13  
14  
15  
16  
17  
18  
19  
20  
21  
22  
23  
24  
25  
26  
27  
28  
29  
30  
31  
32  
33  
34  
35  
36  
37  
38  
39  
40  
41  
42  
43  
44  
45  
46  
47  
48  
49  
50  
51  
52  
53  
54  
55  
56  
57  
58  
59  
60

22 Understanding the socioeconomic patterning of salt intake during childhood should be  
23 considered in interventions to reduce cardiovascular disease.

For peer review only



1  
2  
3 24 **Article summary:**  
4  
5

6 25 **Article focus**  
7

- 8  
9 26 • To assess the association between socioeconomic status (SES) and dietary sodium intake  
10  
11 27 in Australian children and adolescents.  
12  
13  
14 28 • To determine if the major dietary sources of sodium differ by socioeconomic group.  
15  
16

17 29 **Key messages**  
18

- 19  
20 30 • In Australian children socioeconomic status is inversely associated with dietary sodium  
21  
22 31 intake.  
23  
24  
25 32 • Children of low socioeconomic background consumed more sodium from convenience  
26  
27 33 style foods including pies/sausage rolls; savoury sauces, fried prepared potato; processed  
28  
29 34 meat and potato crisps.  
30  
31  
32

33 35 **Strengths and limitations of this study**  
34

- 35  
36 36 • These results are based on a large nationally representative sample of Australian children  
37  
38 37 and adolescents.  
39  
40  
41 38 • Sodium intake was determined via a 24-hr dietary recall and therefore does not capture the  
42  
43 39 amount of sodium derived from salt used at the table or during cooking.  
44  
45

46  
47 40 The socioeconomic disparity of sodium intake reported in this study is attributable to  
48  
49 41 differences in sodium intake from food sources only. Further research is required to  
50  
51 42 understand how SES impacts on raising sodium intake.  
52  
53  
54  
55  
56  
57  
58  
59  
60

## 43 INTRODUCTION

44 As in adults,<sup>(1)</sup> dietary sodium intake is positively associated with blood pressure in  
45 children.<sup>(2, 3)</sup> Comparable to other developed nations,<sup>(4)</sup> dietary sodium intake of Australian  
46 children is high and exceeds dietary recommendations.<sup>(5, 6)</sup> Given blood pressure follows a  
47 tracking pattern over the life course,<sup>(7, 8)</sup> it is likely that high sodium consumption during  
48 childhood increases future risk of adult hypertension and subsequent cardiovascular disease  
49 (CVD). Increased CVD risk is also observed with low SES,<sup>(9, 10)</sup> potentially due in part to  
50 differences in dietary intakes. Furthermore, prolonged inequalities of SES across the life  
51 course are likely to accumulate to overall greater CVD risk,<sup>(11, 12)</sup> A number of studies in  
52 adults<sup>(13-15)</sup> and in children and adolescents<sup>(16-20)</sup> have identified SES as a determinant of diet  
53 quality. For instance, evidence from cross-sectional studies in children and adolescents have  
54 reported a positive association between SES and fruit and vegetable intake<sup>(17, 18, 21)</sup> and  
55 conversely, lower levels of SES have been associated with poor dietary outcomes, including  
56 greater intake of high fat foods,<sup>(20)</sup> fast foods and soft drinks.<sup>(19)</sup> Studies examining the  
57 association between SES and sodium intake are scarce and inconsistent, one study in British  
58 adults found low SES was associated with higher intakes of sodium,<sup>(22)</sup> whereas in US adults  
59 there was no association between SES and sodium intake.<sup>(23)</sup> The aim of this study was to  
60 examine the association between SES and dietary sodium intake and the food sources of  
61 sodium in a nationally representative sample of Australian children aged 2-16 years.

## 63 METHODS

### 64 Study design

1  
2  
3 65 The 2007 Australian Children's Nutrition and Physical Activity Survey (CNPAS) was a  
4  
5 66 cross-sectional survey designed to collect demographic, dietary, anthropometric and physical  
6  
7 67 activity data from a nationally representative sample of children aged 2-16 years. The full  
8  
9 68 details of the sampling methodology can be found elsewhere.<sup>(24)</sup> Briefly, participants were  
10  
11 69 recruited using a multistage quota sampling framework. The initial target quota was 1000  
12  
13 70 participants for each of the following age groups; 2-3, 4-8, 9-13 and 14-16 years (50% boys  
14  
15 71 and 50% girls), to which a 400 booster sample was later provided by the state of South  
16  
17 72 Australia. The primary sampling unit was postcode and clusters of postcodes were randomly  
18  
19 73 selected as stratified by state/territory and by capital city statistical division or rest of  
20  
21 74 state/territory. Randomly selected clusters of postcodes ensured an equal number of  
22  
23 75 participants in each age group, from each of the metro and non-metro areas within each state.  
24  
25 76 Within selected postcodes Random Digit Dialling (RDD) was used to invite eligible  
26  
27 77 households, i.e. those with children aged 2-16 years, to participate in the study. Only one  
28  
29 78 child from each household could participate in the study. The response rate of eligible  
30  
31 79 children was 40%. Due to the non-proportionate nature of the sampling framework each  
32  
33 80 participant was assigned a population weighting which weighted for age, gender and region.  
34  
35 81 The study was approved by the National Health and Medical Research Council registered  
36  
37 82 Ethics Committees of Commonwealth Scientific and Industrial Research Organisation and  
38  
39 83 the University of South Australia. All participants, or where the child was aged <14 years the  
40  
41 84 primary carer, provided written consent.<sup>(24)</sup>  
42  
43  
44  
45  
46  
47  
48  
49  
50

## 51 **Assessments**

52  
53  
54 87 Demographic and food intake data was collected during a face to face computer assisted  
55  
56 88 personal interview (CAPI) completed during February and August 2007. A three-pass 24 h  
57  
58  
59  
60

1  
2  
3 89 dietary recall was used to determine all food and beverages consumed from midnight to  
4  
5 90 midnight on the day prior to the interview.<sup>(24)</sup> The three pass method includes the following  
6  
7 91 stages i) provide a quick list of all foods and beverages ii) a series of probe questions relevant  
8  
9 92 to each quick list item to gather more detailed information on time and place of consumption,  
10  
11 93 any additions to the food item, portion size and brand name iii) finally, a recall review to  
12  
13 94 validate information and make any necessary adjustments. Portion sizes were estimated  
14  
15 95 using a validated food model booklet and standard household measures. To minimise error  
16  
17 96 after data collection all interviews were reviewed by study dietitians to assess for unrealistic  
18  
19 97 portion sizes, inadequate detail and typing errors. The primary carer of participants aged 9  
20  
21 98 years and under provided information on dietary intake.<sup>(24)</sup>  
22  
23  
24  
25  
26  
27  
28

29 100 Sodium intake was calculated using the Australian nutrient composition database  
30  
31 101 AUSNUT2007, specifically developed by the Food Standards Australia and New Zealand for  
32  
33 102 the CNPAS.<sup>(25)</sup> A description of the food coding system using in this database has previously  
34  
35 103 been described.<sup>(26)</sup> Daily sodium (mg) intake was converted to the salt equivalent (g) using  
36  
37 104 the conversion 1 gram of sodium chloride (salt) = 390 mg sodium. Reported salt intake did  
38  
39 105 not include salt added at the table or during cooking.  
40  
41  
42  
43  
44  
45

#### 46 107 *Indicator of socioeconomic status*

47  
48

49 108 Consistent with other dietary studies in children and adolescents we have used level of  
50  
51 109 education attained by the primary carer and household income as markers of SES.<sup>(27,28)</sup> The  
52  
53 110 highest level of education attained by the primary carer was used to define SES. Based on  
54  
55 111 this participants were grouped into one of three categories of SES; i) high: includes those  
56  
57  
58  
59  
60

1  
2  
3 112 with a university/tertiary qualification ii) mid: includes those with an advanced diploma,  
4  
5 113 diploma or certificate III/IV or trade certificate iii) low: includes those with some or no level  
6  
7 114 of high school education. Parental income was used as a secondary indicator of SES.  
8  
9 115 Reported parental income before tax was grouped into four categories i) AUD\$ 0 to \$31 999  
10  
11 116 ii) \$31 200 to \$51 999 iii) \$52 000 to \$103 999 iv)  $\geq$  \$104 000. Body weight and height were  
12  
13 117 measured using standardised protocols.<sup>(29)</sup> BMI was calculated as body weight (kg) divided  
14  
15 118 by the square of body height (m<sup>2</sup>). Participants were grouped into weight categories (very  
16  
17 119 underweight, underweight, healthy weight, overweight, obese) using the International  
18  
19 120 Obesity Task Force BMI reference cut offs for children.<sup>(30,31)</sup>  
20  
21  
22  
23  
24  
25  
26

## 27 122 **Statistical analysis**

28  
29  
30 123 Statistical analyses were completed using STATA/SE 11 (StataCorp, College Station, Texas  
31  
32 124 USA) and PASW Statistics 17.0 (PASW Inc, Chicago, IL, USA). A *P* value of <0.05 was  
33  
34 125 considered significant. All analyses accounted for the complex survey design using the  
35  
36 126 STATA svy command, specifying strata variable (region), cluster variable (post code) and  
37  
38 127 population weighting (age, gender, region). Descriptive statistics are presented as mean (SD)  
39  
40 128 or n (% weighted). To assess the association between SES, as defined by primary carer  
41  
42 129 education level, and sodium intake, multiple regression analysis was used with adjustment for  
43  
44 130 age, gender, energy intake and BMI. To further control for the effects of age, the analysis  
45  
46 131 was repeated stratified by age group (i.e. 2-3; 4-8; 9-13; 14-16 years). These age categories  
47  
48 132 are consistent with those used in Australian dietary guidelines<sup>(6)</sup>. As income level is  
49  
50 133 sometimes used as a marker of SES<sup>(13)</sup> the association between parental income and sodium  
51  
52 134 intake was also examined, with adjustment for age, gender, energy intake and BMI. The  
53  
54  
55  
56  
57  
58  
59  
60

1  
2  
3 135 regression coefficient ( $\beta$ ) with 95% CI, corresponding  $P$  values and the coefficient of  
4  
5 136 determination ( $R^2$ ) are presented. In a previous analysis<sup>(26)</sup> which included the same study  
6  
7 137 population we used the population proportion formula<sup>(32)</sup> to calculate the contribution of  
8  
9  
10 138 sodium from sub-major food group categories, as defined in the CNPAS food group coding  
11  
12 139 system.<sup>(24)</sup> The population proportion formula<sup>(32)</sup> is outlined below:

14  
15 140 **% of sodium from food group** = [sum of sodium from food group (mg) / total sum of  
16  
17  
18 141 sodium from all foods (mg)] X 100

19  
20  
21 142 For the present study, we have utilised this list which identifies the main sources of dietary  
22  
23 143 sodium, to determine if sodium intake from food group differs between low and high SES  
24  
25 144 categories, based on primary carer education level. To do this, we calculated the mean  
26  
27 145 sodium intake from each sub-major food group by SES category, and compared the mean  
28  
29 146 sodium of low to high SES, using an independent T-test.  
30  
31

32  
33 147  
34  
35

## 36 148 **RESULTS**

37  
38  
39 149 Basic characteristics of the 4 487 participants are listed in **Table 1**. As defined by parental  
40  
41 150 education status, the proportion of children from low, mid and high SES background was  
42  
43 151 relatively evenly distributed. Over two thirds of children fell within the two highest income  
44  
45 152 bands. Average daily sodium intake differed by SES (**Figure 1**,  $P < 0.01$ ). Regression  
46  
47 153 analysis indicated that low SES was associated with a 195 mg/d (salt 0.5 g/d) greater intake  
48  
49 154 of sodium. The association between SES and sodium intake remained after adjustment for  
50  
51 155 age, gender, energy intake and BMI (**Table 2**). When stratified by age group the association  
52  
53 156 between sodium intake and SES remained significant between the ages of 4-13 years (**Table**  
54  
55  
56  
57  
58  
59  
60

1  
2  
3 157 2), however there was no association between sodium intake and SES in 2-3 year olds or in  
4  
5 158 14-16 year olds (data not shown). There was no association between sodium intake and  
6  
7 159 parental income (data not shown), however, only 28% of children fell within the two lowest  
8  
9  
10 160 income bands (**Table 1**)

11  
12  
13 161

14  
15  
16 162 **Table 3** lists those sub-major food groups which contributed >1% to the groups' total daily  
17  
18 163 sodium intake. Combined these 23 food groups accounted for 84.5% of total daily sodium  
19  
20 164 intake. Regular breads and bread rolls contributed the most sodium. Moderate sources of  
21  
22 165 sodium, contributing more than 4% of total sodium intake, included mixed dishes where  
23  
24 166 cereal is the major ingredient (e.g. pizza, hamburger, sandwich, savoury rice and noodle  
25  
26 167 based dishes), processed meat, gravies and savoury sauces, pastries, cheese, and breakfast  
27  
28 168 cereals and bars. Compared to children of high SES, children of low SES had a significantly  
29  
30 169 greater intake of sodium from processed meat, gravies and savoury sauce, pastries, breakfast  
31  
32 170 cereals and bars, potatoes and potato snacks (e.g. potato crisps). The percentage difference in  
33  
34 171 sodium intake in each of these categories was 46%, 31%, 24%, 16%, 39% and 46%,  
35  
36 172 respectively (**Table 3**). Conversely, children of high SES background had a significantly  
37  
38 173 greater intake of sodium from the food group containing cakes, buns, muffins, scones, cake-  
39  
40 174 type desserts; and the food group described as batter-based products (e.g. pancakes, picklets).  
41  
42 175 The percentage difference in sodium intake in each of these categories was 16% and 32%,  
43  
44 176 respectively (**Table 3**).

45  
46  
47  
48  
49 177

50  
51  
52  
53 178 **DISCUSSION**

1  
2  
3 179 In a nationally representative sample of Australian children aged 2-16 years, we found  
4  
5 180 children of low SES background consumed 9% more dietary sodium, from food sources, than  
6  
7 181 those of high SES background. The inverse association between sodium intake and SES was  
8  
9 182 primarily driven by the association in children aged 4-13 years, particularly after adjustment  
10  
11 183 for the important covariates age, gender, energy intake and BMI. In adult studies, low SES  
12  
13 184 has been associated with more frequent consumption of high salt foods, such as soup, sauces,  
14  
15 185 ready to eat meals, savoury seasonings, sausages and potato.<sup>(33, 34)</sup> Given parental control  
16  
17 186 over children's food choices during these years, it is likely that SES disparities in adult food  
18  
19 187 choices relating to high salt foods may filter down into children's eating practices. We found  
20  
21 188 no association between SES and sodium intake in 2-3 and 14-16 year olds. Although some  
22  
23 189 evidence indicates SES disparities in dietary patterns may be present during infancy,<sup>(35)</sup> it is  
24  
25 190 possible such early differences are not seen in dietary patterns with the restricted range of  
26  
27 191 food types. In the case of adolescents, as autonomy over food choices increases, other  
28  
29 192 factors, such as peer-influence, taste and eating away from the home<sup>(36)</sup> may become more  
30  
31 193 prominent determinants of dietary intake.  
32  
33  
34  
35  
36  
37  
38  
39

40 195 Using US National Health and Nutrition Examination Survey (NHANES) data, Mazur et  
41  
42 196 al.<sup>(37)</sup> explored the association of SES, as indicated by head of household education status and  
43  
44 197 household income, on sodium intake in Hispanic children aged 4-16 years. Interestingly, in  
45  
46 198 this study lower levels of education were associated with lower sodium intake<sup>(37)</sup>. This is  
47  
48 199 contrary to our own findings as well as past studies, which generally link lower SES to  
49  
50 200 overall poorer dietary outcomes.<sup>(13)</sup> We found no association between sodium intake and  
51  
52 201 level of income, however low income bands were underrepresented. This is in contrast to the  
53  
54 202 findings in Hispanic children, where low household income was associated with a greater  
55  
56  
57  
58  
59  
60



1  
2  
3 203 intake of dietary sodium.<sup>(37)</sup> In a New Zealand food survey, low cost 'home brand' labelled  
4  
5 204 food products were found to contain greater quantities of sodium than the more expensive  
6  
7 205 branded food products.<sup>(38)</sup> The impact of income on sodium intake in Australian children  
8  
9  
10 206 remains unclear and further research is required.

11  
12  
13 207

14  
15  
16 208 Previous studies in children have reported socioeconomic differences in the consumption of  
17  
18 209 certain food groups.<sup>(39, 40)</sup> For example, in European children of low SES background, greater  
19  
20 210 intake of starchy foods, meat products, savoury snacks such as hamburgers, sugar and  
21  
22 211 confectionary, pizza, desserts and soft drinks have been reported.<sup>(39, 40)</sup> In the present study  
23  
24 212 those food groups which were found to contribute more sodium to the diets of low SES  
25  
26 213 children tended to include convenience style foods (i.e. pies/sausage rolls; savoury sauce and  
27  
28 214 casserole base sauces; fried prepared potato; processed meat; potato snacks). Comparably,  
29  
30 215 children of high SES background consumed greater amounts of sodium from cake and baked  
31  
32 216 type products. However, a significant amount of sodium in baked products can be in sodium  
33  
34 217 bicarbonate rather than in the form of sodium chloride. Sodium bicarbonate, unlike sodium  
35  
36 218 chloride, has not been directly associated with adverse blood pressure outcomes.<sup>(41)</sup>

37  
38  
39  
40  
41 219

42  
43  
44 220 With reference to sodium intake data by age group<sup>(5)</sup> and comparison to the recommended  
45  
46 221 daily Upper Limit of sodium<sup>(6)</sup> it is evident that Australian children of all ages across all SES  
47  
48 222 backgrounds are consuming too much dietary sodium. However, for the first time our  
49  
50 223 findings indicate that socioeconomic disparities exist in sodium intake in Australian children  
51  
52 224 aged 9-13 years. To reduce sodium intake in children a comprehensive approach is required,  
53  
54 225 firstly targeting food policy, to encourage product reformulation of lower sodium food  
55  
56  
57  
58  
59  
60

1  
2  
3 226 products across all price ranges within the food supply. Secondly, consumer education and  
4  
5 227 awareness campaigns, that encourage food choices which are based on fresh products with  
6  
7 228 minimal processing; this may require strategies that equip parents with enhanced food  
8  
9  
10 229 preparation skills and knowledge of the 'hidden' salt added to many commonly eaten  
11  
12 230 processed foods. Furthermore, it is apparent that these strategies need to reach lower SES  
13  
14 231 groups.

15  
16  
17 232

18  
19  
20 233 The major strengths of this study include the use of a large nationally-representative sample  
21  
22 234 of Australian children, with comprehensive and standardised collection of dietary intake.  
23  
24 235 Limitations of the study include the use of a 24-hr dietary recall to assess sodium intake.  
25  
26 236 Firstly, this method fails to capture the amount of salt coming from salt added at the table and  
27  
28 237 during cooking and therefore is likely to underestimate the true value of salt intake.<sup>(42)</sup> The  
29  
30 238 majority (77%) of dietary sodium consumed is from salt added to processed foods, whilst a  
31  
32 239 smaller amount (11%) has been found to be derived from salt added at the table and during  
33  
34 240 cooking.<sup>(43)</sup> In the present study, the higher intake of sodium reported in children from low  
35  
36 241 SES background is attributable to differences in sodium intake from food sources only. In a  
37  
38 242 previous analysis of these data, we found that children from low SES background (33%) were  
39  
40 243 more likely to report adding salt at the table than children from high SES (25%).<sup>(26)</sup> Thus, it  
41  
42 244 is likely that children of low SES background are consuming greater amounts of total daily  
43  
44 245 sodium than reported in the present analysis. Secondly, assessment of sodium intake is  
45  
46 246 limited by the quality of food composition databases, which may not capture the variation in  
47  
48 247 sodium content of different brand products within each food group.<sup>(42, 44)</sup>

49  
50  
51  
52  
53  
54 248

1  
2  
3 249 In summary, the findings of higher salt intakes from food sources in children of lower SES  
4  
5 250 background, within in a nationally representative sample, provides focus for concern  
6  
7 251 regarding salt related disease across the life course. This socioeconomic patterning of salt  
8  
9 252 intake may in turn influence the SES disparity seen in hypertension and cardiovascular risk in  
10  
11 253 adulthood. To reduce socioeconomic inequalities in health, interventions need to begin early  
12  
13 254 in life and should include product reformulation of lower sodium food products across all  
14  
15 255 price ranges, as well as consumer education and awareness campaigns which reach low SES  
16  
17  
18 256 groups.  
19  
20  
21  
22 257  
23

24  
25 258 **Contributorship statement:** The author's responsibilities were as follows – CAG, KJC, LJR  
26  
27 259 and CAN designed research; CAG performed statistical analysis and wrote the manuscript  
28  
29 260 and is guarantor of the paper; LJR, KJC and CAN helped with data interpretation, revision of  
30  
31 261 manuscript and provided significant consultation. All authors have read and approved the  
32  
33 262 final manuscript.  
34  
35

36 263 **Funding Statement:** This work was supported by a post graduate scholarship from the Heart  
37  
38 264 Foundation of Australia PP 08M 4074.  
39  
40  
41  
42 265  
43  
44  
45 266  
46  
47  
48  
49  
50  
51  
52  
53  
54  
55  
56  
57  
58  
59  
60

**Table 1.** Basic characteristics of Australian children and adolescents aged 2-16 years (n 487)

| Characteristic                   | n or mean | % or SD |
|----------------------------------|-----------|---------|
| Male (n %)                       | 2 249     | 51      |
| Age (years) (mean SD)            | 9.1       | 4.3     |
| Age group (n %)                  |           |         |
| 2-3 years                        | 1071      | 12      |
| 4-8 years                        | 1216      | 34      |
| 9-13 years                       | 1110      | 33      |
| 14-16 years                      | 1090      | 21      |
| Socioeconomic status (n %)*      |           |         |
| Low SES                          | 1414      | 30      |
| Mid SES                          | 1583      | 36      |
| High SES                         | 1490      | 34      |
| Parental income (n %)†           |           |         |
| \$0 to 31 999                    | 500       | 11      |
| \$32 000 to 51 999               | 732       | 17      |
| \$52 000 to 103 999              | 1850      | 42      |
| \$≥104 000                       | 1169      | 30      |
| Weight status (n %)‡             |           |         |
| Underweight                      | 212       | 5       |
| Healthy weight                   | 3267      | 72      |
| Overweight                       | 761       | 17      |
| Obese                            | 247       | 6       |
| Energy (kJ/d) (mean SD)          | 8392      | 3156    |
| Sodium (mg/d) (mean SD)          | 2473      | 1243    |
| Salt equivalent (g/d) (mean SD)§ | 6.3       | 3.1     |

‡ SES as defined by the highest level of education attained by the primary carer

†Participants with missing information for parental income (n=236) excluded

‡Weight classification based on the International Obesity Task Force BMI reference cut offs

(30, 31)

§Salt equivalents (i.e. sodium chloride: 1 g = 390 mg sodium)

For peer review only

1  
2  
3 **Figure 1.** Mean sodium intake (mg/d) by socioeconomic group (n = 4487)<sup>†‡</sup>  
4  
5

6 **[JPEG IMAGE ATTACHED]**  
7  
8  
9  
10  
11  
12  
13  
14  
15  
16  
17

18 \* Significantly different from high SES ( $P < 0.001$ )  
19

20  
21 \*\* Significantly different from high SES ( $P < 0.05$ )  
22

23  
24 †SES as defined by the highest level of education attained by the primary carer  
25  
26  
27  
28  
29  
30  
31  
32  
33  
34  
35  
36  
37  
38  
39  
40  
41  
42  
43  
44  
45  
46  
47  
48  
49  
50  
51  
52  
53  
54  
55  
56  
57  
58  
59  
60

**Table 2.** Association between socioeconomic status (SES) and dietary sodium intake (390 mg/d) (1 g/d salt) in Australian children and adolescents aged 2-16 years (n 4 487) <sup>¶</sup> †

| Variable                    | Total Sample (n=4 487) |         | Age group <sup>‡</sup> |         |                       |         |
|-----------------------------|------------------------|---------|------------------------|---------|-----------------------|---------|
|                             |                        |         | 4-8 years (n=1 216)    |         | 9-13 years (n=1 110)  |         |
|                             | $\beta$ (95% CI)       | P Value | $\beta$ (95% CI)       | P Value | $\beta$ (95% CI)      | P Value |
| <b>Unadjusted</b>           |                        |         |                        |         |                       |         |
| High SES (reference)        |                        |         |                        |         |                       |         |
| Mid SES                     | 0.3 (0.03, 0.5)        | 0.03    | 0.2 (-0.1, 0.6)        | 0.17    | 0.2 (-0.2, 0.6)       | 0.319   |
| Low SES                     | 0.5 (0.3, 0.8)         | <0.001  | 0.5 (0.1, 1.0)         | 0.02    | 0.5 (-0.02, 1.0)      | 0.06    |
|                             | R <sup>2</sup> =0.004  | <0.01   | R <sup>2</sup> =0.008  | 0.05    | R <sup>2</sup> =0.004 | 0.16    |
| <b>Adjusted<sup>§</sup></b> |                        |         |                        |         |                       |         |

1  
2  
3  
4  
5  
6  
7  
8  
9  
10  
11  
12  
13  
14  
15  
16  
17  
18  
19  
20  
21  
22  
23  
24  
25  
26  
27  
28  
29  
30  
31  
32  
33  
34  
35  
36  
37  
38  
39  
40  
41  
42  
43  
44  
45  
46  
47  
48  
49

|                      |                      |        |                      |        |                      |        |
|----------------------|----------------------|--------|----------------------|--------|----------------------|--------|
| High SES (reference) |                      |        |                      |        |                      |        |
| Mid SES              | 0.2 (0.01, 0.4)      | 0.04   | 0.2 (-0.1, 0.4)      | 0.13   | 0.2 (-0.2, 0.6)      | 0.23   |
| Low SES              | 0.5 (0.2, 0.7)       | <0.001 | 0.6 (0.2, 0.9)       | 0.001  | 0.6 (0.1, 1.0)       | 0.01   |
|                      | R <sup>2</sup> =0.49 | <0.001 | R <sup>2</sup> =0.37 | <0.001 | R <sup>2</sup> =0.36 | <0.001 |

---

¶ Dependent variable is sodium intake in units of 390 mg/d (salt equivalent 1 g/d) and independent variable is SES entered as an indicator variable: high SES is the reference category

†SES as defined by the highest level of education attained by the primary carer

‡No association between salt intake and SES in age groups 2-3 years and 14-16 years (models not shown)

§Adjusted for gender, age, energy intake and BMI



**Table 3.** Dietary sources of sodium intake listed by their contribution to intake for the group and mean daily sodium intake by food group, by socioeconomic group¶

| Food group                                           | Total sample<br>(n 4487)                       | SES Group†               |                          |                          | P value‡    |
|------------------------------------------------------|------------------------------------------------|--------------------------|--------------------------|--------------------------|-------------|
|                                                      |                                                | Low (n 1414)             | Mid (n 1583)             | High (n 1490)            |             |
|                                                      | % contribution to total<br>daily sodium intake | Mean sodium<br>(SD) mg/d | Mean sodium<br>(SD) mg/d | Mean sodium<br>(SD) mg/d |             |
| Regular breads and bread rolls                       | 13.4                                           | 340 (315)                | 330 (300)                | 324 (317)                | 0.26        |
| Mixed dishes where cereal is the<br>major ingredient | 8.7                                            | 214 (514)                | 256 (616)                | 172 (445)                | 0.07        |
| <b>Processed meat§</b>                               | <b>7.6</b>                                     | <b>216 (464)</b>         | <b>180 (403)</b>         | <b>168 (368)</b>         | <b>0.02</b> |
| <b>Gravies and savoury sauces□</b>                   | <b>6.5</b>                                     | <b>182 (385)</b>         | <b>166 (395)</b>         | <b>139 (354)</b>         | <b>0.01</b> |
| <b>Pastries¶</b>                                     | <b>4.9</b>                                     | <b>135 (400)</b>         | <b>120 (352)</b>         | <b>109 (345)</b>         | <b>0.03</b> |

1  
2  
3  
4  
5  
6  
7  
8  
9  
10  
11  
12  
13  
14  
15  
16  
17  
18  
19  
20  
21  
22  
23  
24  
25  
26  
27  
28  
29  
30  
31  
32  
33  
34  
35  
36  
37  
38  
39  
40  
41  
42  
43  
44  
45  
46  
47  
48  
49

|                                                                 |            |                  |                  |                 |             |
|-----------------------------------------------------------------|------------|------------------|------------------|-----------------|-------------|
| Cheese                                                          | 4.6        | 114 (209)        | 110 (190)        | 116 (186)       | 0.80        |
| <b>Breakfast cereals and bars</b>                               | <b>4.2</b> | <b>113 (176)</b> | <b>101 (166)</b> | <b>97 (161)</b> | <b>0.03</b> |
| Dairy milk                                                      | 3.9        | 95 (106)         | 94 (103)         | 100 (98)        | 0.25        |
| Herbs, spices, seasonings and<br>stock cubes                    | 3.7        | 114 (482)        | 75 (246)         | 90 (301)        | 0.31        |
| Sausages, frankfurts and saveloys                               | 2.9        | 79 (259)         | 74 (136)         | 61 (201)        | 0.07        |
| Mixed dishes where poultry/game<br>is the major component       | 2.6        | 79 (268)         | 59 (194)         | 60 (238)        | 0.09        |
| Soup (prepared, ready to eat)                                   | 2.6        | 51 (288)         | 74 (379)         | 65 (282)        | 0.25        |
| English-style muffins, flat breads,<br>and savoury sweet breads | 2.4        | 55 (158)         | 58 (180)         | 67 (181)        | 0.17        |
| <b>Cakes, buns, muffins, scones,</b>                            | <b>2.3</b> | <b>54 (153)</b>  | <b>52 (144)</b>  | <b>68 (176)</b> | <b>0.02</b> |

---

| <b>cake-type desserts</b>                                       |            |                 |                 |                 |             |
|-----------------------------------------------------------------|------------|-----------------|-----------------|-----------------|-------------|
| Savoury biscuits                                                | 2.2        | 49 (136)        | 57 (147)        | 57 (152)        | 0.34        |
| Yeast, yeast, vegetable and meat<br>extracts                    | 2.0        | 47 (117)        | 55 (143)        | 45 (108)        | 0.70        |
| <b>Potatoes</b> ¶ ¶ ¶                                           | <b>1.9</b> | <b>53 (128)</b> | <b>51 (127)</b> | <b>38 (106)</b> | <b>0.01</b> |
| <b>Batter-based products</b> ††                                 | <b>1.7</b> | <b>38 (161)</b> | <b>37 (150)</b> | <b>50 (180)</b> | <b>0.05</b> |
| <b>Potato snacks</b>                                            | <b>1.7</b> | <b>51 (149)</b> | <b>40 (121)</b> | <b>35 (125)</b> | <b>0.03</b> |
| Pasta and pasta products                                        | 1.4        | 35 (142)        | 32 (130)        | 35 (138)        | 0.89        |
| Sweet biscuits                                                  | 1.2        | 29 (64)         | 33 (72)         | 27 (62)         | 0.61        |
| Mixed dishes where beef, veal or<br>lamb is the major component | 1.1        | 32 (175)        | 21 (116)        | 28 (56)         | 0.53        |
| Mature legumes and pulse                                        | 1.0        | 21 (149)        | 21 (137)        | 35 (258)        | 0.12        |

---

1  
2  
3  
4  
5 products and dishes  
6  
7

---

8 ¶ Includes those sub-major food group categories that contribute >1.0% of sodium to daily intake ambiguous  
9

10  
11 †SES as defined by the highest level of education attained by the primary carer  
12

13  
14 ‡Means are compared between low and high SES groups using independent T-test  
15

16  
17 §includes ham, bacon and processed delicatessen meat  
18

19  
20 □includes pasta sauces and casserole bases  
21

22  
23 ¶includes pies and sausage rolls  
24

25  
26 ¶ ¶ includes potato gems and wedges  
27

28  
29 ††includes pancakes and pikelets  
30  
31  
32  
33  
34  
35  
36  
37  
38  
39  
40  
41  
42  
43  
44  
45  
46  
47  
48  
49

1  
2  
3  
4  
5  
6  
7  
8  
9  
10  
11  
12  
13  
14  
15  
16  
17  
18  
19  
20  
21  
22  
23  
24  
25  
26  
27  
28  
29  
30  
31  
32  
33  
34  
35  
36  
37  
38  
39  
40  
41  
42  
43  
44  
45  
46  
47  
48  
49  
50  
51  
52  
53  
54  
55  
56  
57  
58  
59  
60

For peer review only

**REFERENCES**

1. Dickinson BD, Havas S. Reducing the population burden of cardiovascular disease by reducing sodium intake. *Arch Intern Med* 2007;**167**:1460-68.
2. He FJ, MacGregor GA. Importance of Salt in Determining Blood Pressure in Children Meta-Analysis of Controlled Trials. *Hypertension* 2006;**48**:861-69.
3. He FJ, Marrero NM, MacGregor GA. Salt and blood pressure in children and adolescents. *J Hum Hyperten* 2008;**22**:4-11.
4. Brown IJ, Tzoulaki I, Candeias V, et al. Salt intakes around the world: implications for public health. *Int J Epidemiol* 2009;**38**:791-813.
5. Department of Health and Ageing, Australian Food and Grocery Council, Department of Agriculture Fisheries and Forestry. 2007 Australian National Children's Nutrition and Physical Activity Survey - Main Findings. Canberra: Commonwealth of Australia, 2008. Available from:  
[http://www.health.gov.au/internet/main/publishing.nsf/content/66596E8FC68FD1A3CA2574D50027DB86/\\$File/childrens-nut-phys-survey.pdf](http://www.health.gov.au/internet/main/publishing.nsf/content/66596E8FC68FD1A3CA2574D50027DB86/$File/childrens-nut-phys-survey.pdf).
6. National Health and Medical Research Council. Nutrient reference values for Australia and New Zealand. Canberra: Australian Government. Department of Health and Ageing, 2006. Available from:  
[http://www.nhmrc.gov.au/files\\_nhmrc/publications/attachments/n35.pdf](http://www.nhmrc.gov.au/files_nhmrc/publications/attachments/n35.pdf).
7. Chen X, Wang Y. Tracking of blood pressure from childhood to adulthood A systematic review and meta-regression analysis. *Circulation* 2008;**117**:3171-80.
8. Toschke AM, Kohl L, Mansmann U, et al. Meta-analysis of blood pressure tracking from childhood to adulthood and implications for the design of intervention trials. *Acta Paediatrica* 2010;**99**:24-29.

- 1  
2  
3 9. Kaplan GA, Keil JE. Socioeconomic factors and cardiovascular disease: a review of the  
4  
5 literature. *Circulation* 1993;**88**:1973-98.  
6
- 7  
8 10. Rosengren A, Subramanian SV, Islam S, et al. Education and risk for acute myocardial  
9  
10 infarction in 52 high, middle and low-income countries: INTERHEART case-control  
11  
12 study. *Heart* 2009;**95**:2014-22.  
13
- 14 11. Loucks EB, Lynch JW, Pilote L, et al. Life-course socioeconomic position and incidence  
15  
16 of coronary heart disease: the Framingham Offspring Study. *Am J Epidemiol*  
17  
18 2009;**169**:829-36.  
19
- 20 12. Pollitt RA, Rose KM, Kaufman JS. Evaluating the evidence for models of life course  
21  
22 socioeconomic factors and cardiovascular outcomes: a systematic review. *BMC*  
23  
24 *Public Health* 2005;**5**:7.  
25  
26
- 27 13. Darmon N, Drewnowski A. Does social class predict diet quality? *Am J Clin Nutr*  
28  
29 2008;**87**:1107-17.  
30
- 31 14. Giskes K, Turrell G, Patterson C, et al. Socio-economic differences in fruit and vegetable  
32  
33 consumption among Australian adolescents and adults. *Public Health Nutr*  
34  
35 2002;**5**:663-69.  
36  
37
- 38 15. Hulshof KFAM, Brussaard JH, Kruijzinga AG, et al. Socio-economic status, dietary intake  
39  
40 and 10 y trends: the Dutch National Food Consumption Survey. *Eur J Clin Nutr*  
41  
42 2003;**57**:128-37.  
43  
44
- 45 16. Ambrosini GL, Oddy WH, Robinson M, et al. Adolescent dietary patterns are associated  
46  
47 with lifestyle and family psycho-social factors. *Public Health Nutr* 2009;**12**:1807-15.  
48
- 49 17. Haapalahti M, Mykkanen H, Tikkanen S, et al. Meal patterns and food use in 10- to 11-  
50  
51 year old Finnish children. *Public Health Nutr* 2002;**6**:365-70.  
52  
53
- 54 18. Neumark-Sztainer D, Wall M, Perry C, et al. Correlates of fruit and vegetable intake  
55  
56 among adolescents Findings from Project EAT. *Prev Med* 2003;**37**:198-208.  
57  
58

- 1  
2  
3 19. Utter J, Denny S, Crengle S, et al. Socio-economic differences in eating-related attitudes,  
4 behaviours and environments of adolescents. *Public Health Nutr* 2010;**14**:629-34.  
5  
6  
7 20. Wardle J, Jarvis MJ, Steggle N, et al. Socioeconomic disparities in cancer-risk  
8 behaviours in adolescence: baseline results from the Health and Behaviour in  
9 Teenagers Study (HABITS). *Prev Med* 2003;**36**:721-30.  
10  
11  
12 21. Dubois L, Farmer A, Girard M, et al. Demographic and socio-economic factors related to  
13 food intake and adherence to nutritional recommendations in a cohort of pre-school  
14 children. *Public Health Nutr* 2011;**14**:1096-104.  
15  
16  
17 22. Bates CJ, Prentice A, Cole TJ, et al. Micronutrients: highlights and research challenges  
18 from the 1994–5 National Diet and Nutrition Survey of people aged 65 years and  
19 over. *Brit J Nutr* 1999;**82**:7-15.  
20  
21  
22 23. Gerber AM, James SA, Ammerman AS, et al. Socioeconomic status and electrolyte  
23 intake in black adults: the Pitt country Study. *Am J Public Health* 1991;**81**:1608-12.  
24  
25  
26 24. Department of Health and Ageing. User Guide 2007 Australian National Children's  
27 Nutrition and Physical Activity Survey. Canberra: 2010. Available from:  
28 [http://www.health.gov.au/internet/main/publishing.nsf/Content/AC3F256C715674D5](http://www.health.gov.au/internet/main/publishing.nsf/Content/AC3F256C715674D5CA2574D60000237D/$File/user-guide-v2.pdf)  
29 [CA2574D60000237D/\\$File/user-guide-v2.pdf](http://www.health.gov.au/internet/main/publishing.nsf/Content/AC3F256C715674D5CA2574D60000237D/$File/user-guide-v2.pdf).  
30  
31  
32 25. Food Standards Australian and New Zealand [Internet]. Canberra: Food Standards  
33 Australia and New Zealand; [cited 2009 Jan 23]. Available from:  
34 <http://www.foodstandards.gov.au/consumerinformation/ausnut2007/>.  
35  
36  
37 26. Grimes CA, Campbell KJ, Riddell LJ, et al. Sources of sodium in Australian children's  
38 diets and the effect of the application of sodium targets to food products to reduce  
39 sodium intake. *Br J Nutr* 2011;**105**:468-77.  
40  
41  
42 27. Cameron AJ, Ball K, Pearson N, et al. Socioeconomic variation in diet and activity-  
43 related behaviours of Australian children and adolescents  
44  
45  
46  
47  
48  
49  
50  
51  
52  
53  
54  
55  
56  
57  
58  
59  
60



- 1  
2  
3 aged 2–16 years. *Pediatr Obes* 2010;**7**:329-42.
- 4  
5 28. Golley RK, Hendrie GA, McNaughton SA. Scores on the Dietary Guideline Index for  
6  
7 Children and Adolescents Are Associated with Nutrient Intake and Socio-Economic  
8  
9 position but Not Adiposity. *J Nutr* 2011;**141**:1340-7.
- 10  
11 29. Marfell-Jones M, Olds T, Stewart A, et al. International standards for anthropometric  
12  
13 assessment. Potchefstroom, South Africa: International standards for anthropometric  
14  
15 assessment,, 2006. Available from:
- 16  
17 30. Cole TJ. Establishing a standard definition for child overweight and obesity worldwide:  
18  
19 international survey. *Br Med J* 2000;**320**:1-6.
- 20  
21 31. Cole TJ, Flegal KM, Nicholls D, et al. Body mass index cut offs to define thinness in  
22  
23 children and adolescents: international survey. *Brit Med J* 2007;**335**:194-7.
- 24  
25 32. Krebs-Smith SM, Kott PS, Guenther PM. Mean proportion and population proportion:  
26  
27 two answers to the same question? *J Am Diet Assoc* 1989;**89**:667-72.
- 28  
29 33. Purdy J, Armstrong G, McIlveen H. The influence of socio-economic status on salt  
30  
31 consumption in Northern Ireland. *International Journal of Consumer Studies*  
32  
33 2002;**26**:71-80.
- 34  
35 34. Van der Veen JE, Graaf CD, Van Dis SJ, et al. Determinants of salt use in cooked meals  
36  
37 in the Netherlands: attitudes and practices of food preparers. *Eur J Clin Nutr*  
38  
39 1999;**53**:388-94.
- 40  
41 35. Okubo H, Miyake Y, Sasaki S, et al. Dietary patterns in infancy and their associations  
42  
43 with maternal socio-economic and lifestyle factors among 758 Japanese mother–child  
44  
45 pairs: the Osaka Maternal and Child Health Study. *Matern Child Nutr*  
46  
47 2012;**8**:doi:10.1111/j.740-8709.2012.00403.x.
- 48  
49 36. Story M, Neumark-Sztainer D, French S. Individual and environmental influences on  
50  
51 adolescent eating behaviours. *J Am Diet Assoc* 2002;**102**:S40-S51.
- 52  
53  
54  
55  
56  
57  
58  
59  
60

- 1  
2  
3 37. Mazur RE, Marquis GS, Jensen HH. Diet and food insufficiency among Hispanic youths:  
4  
5 acculturation and socioeconomic factors in the third National Health and Nutrition  
6  
7 Examination Survey. *Am J Clin Nutr* 2003;**78**:1120-27.  
8  
9  
10 38. Monro D, Young L, Wilson J, et al. The sodium content of low cost and private label  
11  
12 foods; implications for public health. *Journal of the New Zealand Dietetic Association*  
13  
14 2004;**58**:4-10.  
15  
16 39. Lioret S, Dubuisson C, Dufour A, et al. Trends in food intake in French children from  
17  
18 1999 to 2007: results from the INCA (etude Individuelle Nationale des  
19  
20 Consommations Alimentaires) dietary surveys. *Brit J Nutr* 2010;**103**:585-601.  
21  
22  
23 40. Sausenthaler S, Standl M, Buyken A, et al. Regional and socio-economic differences in  
24  
25 food, nutrient and supplement intake in school-age children in Germany: results from  
26  
27 the GINIplus and the LISAPLUS studies. *Public Health Nutr* 2011;**10**:1724-35.  
28  
29  
30 41. McCarty MF. Should we restrict chloride rather than sodium? *Med Hypotheses*  
31  
32 2004;**63**:138-48.  
33  
34 42. Loria CM, Obarzanek E, Ernst ND. The Dietary Guidelines: Surveillance Issues and  
35  
36 Research Needs. *Choose and Prepare Foods with Less Salt: Dietary Advice for All*  
37  
38 Americans. *J Nutr* 2001;**131**:536S-51S.  
39  
40  
41 43. Mattes RD, Donnelly D. Relative contributions of dietary sodium sources. *J Am Coll*  
42  
43 *Nutr* 1991;**10**:383-93.  
44  
45 44. World Health Organization. Creating an enabling environment for population-based salt  
46  
47 reduction strategies. United Kingdom: World Health Organization, 2010. Available  
48  
49 from:  
50  
51  
52  
53  
54  
55  
56  
57  
58  
59  
60

~~Dietary sodium intake is associated with socioeconomic status in Australian children: a cross-sectional study~~

Is socioeconomic status associated with dietary sodium intake in Australian children? A cross-sectional study

Carley A. Grimes<sup>1</sup>, Karen J Campbell<sup>2</sup>, Lynn J Riddell<sup>3</sup>, Caryl A. Nowson<sup>4</sup>

<sup>1</sup> Carley A. Grimes, Centre for Physical Activity and Nutrition Research, School of Exercise and Nutrition Sciences, Deakin University, 221 Burwood Highway, Burwood, Victoria 3125, Australia.

<sup>2</sup> Karen J. Campbell, Centre for Physical Activity and Nutrition Research, School of Exercise and Nutrition Sciences, Deakin University, 221 Burwood Highway, Burwood, Victoria 3125, Australia.

<sup>3</sup> Lynn J Riddell, Centre for Physical Activity and Nutrition Research, School of Exercise and Nutrition Sciences, Deakin University, 221 Burwood Highway, Burwood, Victoria 3125, Australia.

<sup>4</sup> Caryl A. Nowson, Centre for Physical Activity and Nutrition Research, School of Exercise and Nutrition Sciences, Deakin University, 221 Burwood Highway, Burwood, Victoria 3125, Australia. Tel: 613 9251 7272. Fax: 613 9244 6017. E-mail: [nowson@deakin.edu.au](mailto:nowson@deakin.edu.au)

**Corresponding author & Reprints:**

1  
2  
3 Carley A. Grimes, Centre for Physical Activity and Nutrition Research, School of Exercise  
4 and Nutrition Sciences, Deakin University, 221 Burwood Highway, Burwood, Victoria 3125,  
5  
6  
7 Australia. Tel: 613 9251 7272. Fax: 613 9244 6017. E-mail: carley.grimes@deakin.edu.au  
8  
9

10  
11  
12  
13 **Short title:**

14  
15  
16 Dietary sodium intake and socioeconomic status in Australian children  
17

18  
19 **Key words:**

20  
21  
22 Sodium, Dietary; Sodium Chloride; Socioeconomic Status; Child; Australia  
23  
24

25  
26 **Word count:** 2378  
27

28  
29 **Declaration of competing interests:**

30  
31 All authors have completed the Unified Competing Interest form  
32  
33 at [www.icmje.org/coi\\_disclosure.pdf](http://www.icmje.org/coi_disclosure.pdf) (available on request from the corresponding author)  
34  
35 and declare: Carley Grimes had financial support in the form of a post graduate scholarship  
36  
37 from the Heart Foundation, Australia for the submitted work; and had no financial  
38  
39 relationships with any organisations that might have an interest in the submitted work in the  
40  
41 previous three years, no other relationships or activities that could appear to have influenced  
42  
43 the submitted work. Karen Campbell had no support from any organisation for the submitted  
44  
45 work; no other relationships or activities that could appear to have influenced the submitted  
46  
47 work. Caryl Nowson has received research funds from Meat & Livestock Australia; National  
48  
49 Health and Medical Research Council, Wicking Foundation, National Heart Foundation,  
50  
51 Australia, Helen MacPerhson Smith Trust and Red Cross Blood Bank. These payments are  
52  
53  
54  
55  
56  
57  
58  
59  
60

1  
2  
3 unrelated to the submitted work. Lynn Riddell has received research funds from Meat &  
4  
5 Livestock Australia. These payments are unrelated to the submitted work.  
6  
7  
8  
9

10  
11 **Data sharing statement:**  
12

13  
14 The authors declare that on request all data files are available for analysis from the  
15  
16 corresponding author at [carley.grimes@deakin.edu.au](mailto:carley.grimes@deakin.edu.au)  
17  
18  
19  
20  
21  
22  
23  
24  
25  
26  
27  
28  
29  
30  
31  
32  
33  
34  
35  
36  
37  
38  
39  
40  
41  
42  
43  
44  
45  
46  
47  
48  
49  
50  
51  
52  
53  
54  
55  
56  
57  
58  
59  
60

1  
2  
3 1 **ABSTRACT**  
4  
5

6 2 **Objective:** To assess the association between socioeconomic status (SES) and dietary sodium  
7  
8 3 intake, and identify if the major dietary sources of sodium differ by socioeconomic group in a  
9  
10 4 nationally representative sample of Australian children.  
11

12  
13 5 **Design:** Cross-sectional survey.  
14

15  
16 6 **Setting:** 2007 Australian National Children's Nutrition and Physical Activity Survey.  
17

18  
19 7 **Participants:** A total of 4487 children aged 2-16 years completed all components of the  
20  
21 8 survey.  
22

23  
24 9 **Primary and secondary outcome measures:** Sodium intake was determined via one 24-hr  
25  
26 10 dietary recall. The population proportion formula was used to identify the major sources of  
27  
28 11 dietary salt. SES was defined by the level of education attained by the primary carer. In  
29  
30 12 addition parental income was used as a secondary indicator of SES.  
31  
32

33  
34 13 **Results:** Dietary sodium intake of children of low SES background was 2576 (SEM 42) mg/d  
35  
36 14 (salt equivalent 6.6 (0.1) g/d) which was greater than children of high SES background 2370  
37  
38 15 (35) mg/d (salt 6.1 (0.09) g/d) ( $P<0.001$ ). After adjustment for age, gender, energy intake  
39  
40 16 and body mass index, low SES children consumed 195 mg/d (salt 0.5 g/d) more sodium than  
41  
42 17 high SES children ( $P<0.001$ ). Low SES children had a greater intake of sodium from  
43  
44 18 processed meat, gravies/sauces, pastries, breakfast cereals, potatoes and potato snacks (all  
45  
46 19  $P<0.05$ ).  
47  
48

49  
50 20 **Conclusion:** Australian children from a low SES background have on average a 9% greater  
51  
52 21 intake of sodium from food sources compared to those from a high SES background. **This**  
53  
54 22 ~~socioeconomic patterning of salt intake may in turn influence the SES disparity seen in~~  
55  
56  
57  
58  
59  
60

1  
2  
3 23 | ~~hypertension and cardiovascular risk in adulthood.~~ Understanding these the differences in  
4  
5 24 | socioeconomic patterning of salt intake during childhood ~~risk provides important focus for~~  
6  
7 25 | intervention should be considered in interventions to reduce cardiovascular disease.  
8  
9  
10  
11  
12  
13  
14  
15  
16  
17  
18  
19  
20  
21  
22  
23  
24  
25  
26  
27  
28  
29  
30  
31  
32  
33  
34  
35  
36  
37  
38  
39  
40  
41  
42  
43  
44  
45  
46  
47  
48  
49  
50  
51  
52  
53  
54  
55  
56  
57  
58  
59  
60

For peer review only

1  
2  
3 26 **Article summary:**  
4  
5

6 27 **Article focus**  
7  
8

9 • To assess the association between socioeconomic status (SES) and dietary sodium intake  
10  
11 in Australian children and adolescents.  
12

13  
14 • To determine if the major dietary sources of sodium differ by socioeconomic group.  
15  
16

17 31 **Key messages**  
18  
19

20 • In Australian children socioeconomic status is inversely associated with dietary sodium  
21  
22 intake.  
23

24 • Children of low socioeconomic background consumed more sodium from convenience  
25  
26 style foods including pies/sausage rolls; savoury sauces, fried prepared potato; processed  
27  
28 meat and potato crisps.  
29  
30  
31  
32

33 37 **Strengths and limitations of this study**  
34  
35

36 • These results are based on a large nationally representative sample of Australian children  
37  
38 and adolescents.  
39

40 • Sodium intake was determined via a 24-hr dietary recall and therefore does not capture the  
41  
42 amount of sodium derived from salt used at the table or during cooking.  
43  
44

45  
46  
47 • The socioeconomic disparity of sodium intake reported in this study is attributable to  
48  
49 differences in sodium intake from food sources only. Further research is required to  
50  
51 understand [how SES impacts on raising sodium intake.](#) ~~on total daily sodium intake.~~  
52  
53  
54  
55



## 46 INTRODUCTION

47 As in adults,<sup>(1)</sup> dietary sodium intake is positively associated with blood pressure in  
48 children.<sup>(2, 3)</sup> Comparable to other developed nations,<sup>(4)</sup> dietary sodium intake of Australian  
49 children is high and exceeds dietary recommendations.<sup>(5, 6)</sup> Given blood pressure follows a  
50 tracking pattern over the life course,<sup>(7, 8)</sup> it is likely that high sodium consumption during  
51 childhood increases future risk of adult hypertension and subsequent cardiovascular disease  
52 (CVD). Increased CVD risk is also observed with low SES,<sup>(9, 10)</sup> potentially due in part to  
53 differences in dietary intakes. Furthermore, prolonged inequalities of SES across the life  
54 course are likely to accumulate to overall greater CVD risk,<sup>(11, 12)</sup> A number of studies in  
55 adults<sup>(13-15)</sup> and in children and adolescents<sup>(16-20)</sup> have identified SES as a determinant of diet  
56 quality. For instance, evidence from cross-sectional studies in children and adolescents have  
57 reported a positive association between SES and fruit and vegetable intake<sup>(17, 18, 21)</sup> and  
58 conversely, lower levels of SES have been associated with poor dietary outcomes, including  
59 greater intake of high fat foods,<sup>(20)</sup> fast foods and soft drinks.<sup>(19)</sup> Studies examining the  
60 association between SES and sodium intake are scarce and inconsistent, one study in British  
61 adults found low SES was associated with higher intakes of sodium,<sup>(22)</sup> whereas in US adults  
62 there was no association between SES and sodium intake.<sup>(23)</sup> The aim of this study was to  
63 examine the association between SES and dietary sodium intake and the food sources of  
64 sodium in a nationally representative sample of Australian children aged 2-16 years.

## 66 METHODS

### 67 Study design

1  
2  
3 68 The 2007 Australian Children's Nutrition and Physical Activity Survey (CNPAS) was a  
4  
5 69 cross-sectional survey designed to collect demographic, dietary, anthropometric and physical  
6  
7 70 activity data from a nationally representative sample of children aged 2-16 years. The full  
8  
9 71 details of the sampling methodology can be found elsewhere.<sup>(24)</sup> Briefly, participants were  
10  
11 72 recruited using a multistage quota sampling framework. The initial target quota was 1000  
12  
13 73 participants for each of the following age groups; 2-3, 4-8, 9-13 and 14-16 years (50% boys  
14  
15 74 and 50% girls), to which a 400 booster sample was later provided by the state of South  
16  
17 75 Australia. The primary sampling unit was postcode and clusters of postcodes were randomly  
18  
19 76 selected as stratified by state/territory and by capital city statistical division or rest of  
20  
21 77 state/territory. Randomly selected clusters of postcodes ensured an equal number of  
22  
23 78 participants in each age group, from each of the metro and non-metro areas within each state.  
24  
25 79 Within selected postcodes Random Digit Dialling (RDD) was used to invite eligible  
26  
27 80 households, i.e. those with children aged 2-16 years, to participate in the study. Only one  
28  
29 81 child from each household could participate in the study. The response rate of eligible  
30  
31 82 children was 40%. Due to the non-proportionate nature of the sampling framework each  
32  
33 83 participant was assigned a population weighting which weighted for age, gender and region.  
34  
35 84 The study was approved by the National Health and Medical Research Council registered  
36  
37 85 Ethics Committees of Commonwealth Scientific and Industrial Research Organisation and  
38  
39 86 the University of South Australia. All participants, or where the child was aged <14 years the  
40  
41 87 primary carer, provided written consent.<sup>(24)</sup>  
42  
43  
44  
45  
46  
47  
48  
49  
50

## 51 **Assessments**

52  
53  
54 90 Demographic and food intake data was collected during a face to face computer assisted  
55  
56 91 personal interview (CAPI) completed during February and August 2007. A three-pass 24 h  
57  
58  
59  
60

1  
2  
3 92 dietary recall was used to determine all food and beverages consumed from midnight to  
4  
5 93 midnight on the day prior to the interview.<sup>(24)</sup> The three pass method includes the following  
6  
7 94 stages i) provide a quick list of all foods and beverages ii) a series of probe questions relevant  
8  
9 95 to each quick list item to gather more detailed information on time and place of consumption,  
10  
11 96 any additions to the food item, portion size and brand name iii) finally, a recall review to  
12  
13 97 validate information and make any necessary adjustments. Portion sizes were estimated  
14  
15 98 using a validated food model booklet and standard household measures. To minimise error  
16  
17 99 after data collection all interviews were reviewed by study dietitians to assess for unrealistic  
18  
19 100 portion sizes, inadequate detail and typing errors. The primary carer of participants aged 9  
20  
21 101 years and under provided information on dietary intake.<sup>(24)</sup>  
22  
23  
24  
25  
26 102  
27  
28

29 103 Sodium intake was calculated using the Australian nutrient composition database  
30  
31 104 AUSNUT2007, specifically developed by the Food Standards Australia and New Zealand for  
32  
33 105 the CNPAS.<sup>(25)</sup> A description of the food coding system using in this database has previously  
34  
35 106 been described.<sup>(26)</sup> Daily sodium (mg) intake was converted to the salt equivalent (g) using  
36  
37 107 the conversion 1 gram of sodium chloride (salt) = 390 mg sodium. Reported salt intake did  
38  
39 108 not include salt added at the table or during cooking.  
40  
41  
42  
43 109  
44  
45

46 110 *Indicator of socioeconomic status*

47  
48  
49 111 Consistent with other dietary studies in children and adolescents we have used level of  
50  
51 112 education attained by the primary carer and household income as markers of SES.<sup>(27, 28)</sup> The  
52  
53 113 highest level of education attained by the primary carer was used to define SES. Based on  
54  
55 114 this participants were grouped into one of three categories of SES; i) high: includes those  
56  
57  
58  
59  
60

1  
2  
3 115 with a university/tertiary qualification ii) mid: includes those with an advanced diploma,  
4  
5 116 diploma or certificate III/IV or trade certificate iii) low: includes those with some or no level  
6  
7 117 of high school education. Parental income was used as a secondary indicator of SES.  
8  
9 118 Reported parental income before tax was grouped into four categories i) AUD\$ 0 to \$31 999  
10  
11 119 ii) \$31 200 to \$51 999 iii) \$52 000 to \$103 999 iv)  $\geq$  \$104 000. Body weight and height were  
12  
13 120 measured using standardised protocols.<sup>(29)</sup> BMI was calculated as body weight (kg) divided  
14  
15 121 by the square of body height (m<sup>2</sup>). Participants were grouped into weight categories (very  
16  
17 122 underweight, underweight, healthy weight, overweight, obese) using the International  
18  
19 123 Obesity Task Force BMI reference cut offs for children.<sup>(30,31)</sup>  
20  
21  
22  
23  
24 124  
25  
26

## 27 125 **Statistical analysis**

28  
29  
30 126 Statistical analyses were completed using STATA/SE 11 (StataCorp, College Station, Texas  
31  
32 127 USA) and PASW Statistics 17.0 (PASW Inc, Chicago, IL, USA). A *P* value of <0.05 was  
33  
34 128 considered significant. All analyses accounted for the complex survey design using the  
35  
36 129 STATA svy command, specifying strata variable (region), cluster variable (post code) and  
37  
38 130 population weighting (age, gender, region). Descriptive statistics are presented as mean (SD)  
39  
40 131 or n (% weighted). To assess the association between SES, as defined by primary carer  
41  
42 132 education level, and sodium intake, multiple regression analysis was used with adjustment for  
43  
44 133 age, gender, energy intake and BMI. To further control for the effects of age, the analysis  
45  
46 134 was repeated stratified by age group (i.e. 2-3; 4-8; 9-13; 14-16 years). These age categories  
47  
48 135 are consistent with those used in Australian dietary guidelines<sup>(6)</sup>. As income level is  
49  
50 136 sometimes used as a marker of SES<sup>(13)</sup> the association between parental income and sodium  
51  
52 137 intake was also examined, with adjustment for age, gender, energy intake and BMI. The  
53  
54  
55  
56  
57  
58  
59  
60

1  
2  
3 138 regression coefficient ( $\beta$ ) with 95% CI, corresponding  $P$  values and the coefficient of  
4  
5 139 determination ( $R^2$ ) are presented. In a previous analysis<sup>(26)</sup> which included the same study  
6  
7 140 population we used the population proportion formula<sup>(32)</sup> to calculate the contribution of  
8  
9 141 sodium from sub-major food group categories, as defined in the CNPAS food group coding  
10  
11 142 system.<sup>(24)</sup> The population proportion formula<sup>(32)</sup> is outlined below:

12  
13  
14  
15 143 % of sodium from food group = [sum of sodium from food group (mg) / total sum of  
16  
17 144 sodium from all foods (mg)] X 100

18  
19  
20  
21 145 For the present study, we have utilised this list which identifies the main sources of dietary  
22  
23 146 sodium, to determine if sodium intake from food group differs between low and high SES  
24  
25 147 categories, based on primary carer education level. To do this, we calculated the mean  
26  
27 148 sodium intake from each sub-major food group by SES category, and compared the mean  
28  
29 149 sodium of low to high SES, using an independent T-test.  
30  
31

32  
33 150

## 34 35 36 151 RESULTS

37  
38  
39 152 Basic characteristics of the 4 487 participants are listed in **Table 1**. As defined by parental  
40  
41 153 education status, the proportion of children from low, mid and high SES background was  
42  
43 154 relatively evenly distributed. Over two thirds of children fell within the two highest income  
44  
45 155 bands. Average daily sodium intake differed by SES (**Figure 1**,  $P < 0.01$ ). Regression  
46  
47 156 analysis indicated that low SES was associated with a 195 mg/d (salt 0.5 g/d) greater intake  
48  
49 157 of sodium. The association between SES and sodium intake remained after adjustment for  
50  
51 158 age, gender, energy intake and BMI (**Table 2**). When stratified by age group the association  
52  
53 159 between sodium intake and SES remained significant between the ages of 4-13 years (**Table**  
54  
55  
56  
57  
58  
59  
60

1  
2  
3 160 2), however there was no association between sodium intake and SES in 2-3 year olds or in  
4  
5 161 14-16 year olds (data not shown). There was no association between sodium intake and  
6  
7 162 parental income (data not shown), however, only 28% of children fell within the two lowest  
8  
9 163 income bands (**Table 1**)

10  
11  
12  
13 164

14  
15  
16 165 **Table 3** lists those sub-major food groups which contributed >1% to the groups' total daily  
17  
18 166 sodium intake. Combined these 23 food groups accounted for 84.5% of total daily sodium  
19  
20 167 intake. Regular breads and bread rolls contributed the most sodium. Moderate sources of  
21  
22 168 sodium, contributing more than 4% of total sodium intake, included mixed dishes where  
23  
24 169 cereal is the major ingredient (e.g. pizza, hamburger, sandwich, savoury rice and noodle  
25  
26 170 based dishes), processed meat, gravies and savoury sauces, pastries, cheese, and breakfast  
27  
28 171 cereals and bars. Compared to children of high SES, children of low SES had a significantly  
29  
30 172 greater intake of sodium from processed meat, gravies and savoury sauce, pastries, breakfast  
31  
32 173 cereals and bars, potatoes and potato snacks (e.g. potato crisps). The percentage difference in  
33  
34 174 sodium intake in each of these categories was 46%, 31%, 24%, 16%, 39% and 46%,  
35  
36 175 respectively (**Table 3**). Conversely, children of high SES background had a significantly  
37  
38 176 greater intake of sodium from the food group containing cakes, buns, muffins, scones, cake-  
39  
40 177 type desserts; and the food group described as batter-based products (e.g. pancakes, picklets).  
41  
42 178 The percentage difference in sodium intake in each of these categories was 16% and 32%,  
43  
44 179 respectively (**Table 3**).  
45  
46  
47  
48  
49

50 180

51  
52  
53 181 **DISCUSSION**  
54  
55  
56  
57  
58  
59  
60

1  
2  
3 182 In a nationally representative sample of Australian children aged 2-16 years, we found  
4  
5 183 children of low SES background consumed 9% more dietary sodium, from food sources, than  
6  
7 184 those of high SES background. The inverse association between sodium intake and SES was  
8  
9  
10 185 primarily driven by the association in children aged 4-13 years, particularly after adjustment  
11  
12 186 for the important covariates age, gender, energy intake and BMI. In adult studies, low SES  
13  
14 187 has been associated with more frequent consumption of high salt foods, such as soup, sauces,  
15  
16 188 ready to eat meals, savoury seasonings, sausages and potato.<sup>(33, 34)</sup> Given parental control  
17  
18 189 over children's food choices during these years, it is likely that SES disparities in adult food  
19  
20  
21 190 choices relating to high salt foods may filter down into children's eating practices. We found  
22  
23 191 no association between SES and sodium intake in 2-3 and 14-16 year olds. Although some  
24  
25 192 evidence indicates SES disparities in dietary patterns may be present during infancy,<sup>(35)</sup> it is  
26  
27 193 possible such early differences are not seen in dietary patterns with the restricted range of  
28  
29 194 food types. In the case of adolescents, as autonomy over food choices increases, other  
30  
31 195 factors, such as peer-influence, taste and eating away from the home<sup>(36)</sup> may become more  
32  
33 196 prominent determinants of dietary intake.  
34  
35  
36  
37  
38  
39

40 198 Using US National Health and Nutrition Examination Survey (NHANES) data, Mazur et  
41  
42 199 al.<sup>(37)</sup> explored the association of SES, as indicated by head of household education status and  
43  
44 200 household income, on sodium intake in Hispanic children aged 4-16 years. Interestingly, in  
45  
46 201 this study lower levels of education were associated with lower sodium intake<sup>(37)</sup>. This is  
47  
48 202 contrary to our own findings as well as past studies, which generally link lower SES to  
49  
50 203 overall poorer dietary outcomes.<sup>(13)</sup> We found no association between sodium intake and  
51  
52 204 level of income, however low income bands were underrepresented. This is in contrast to the  
53  
54 205 findings in Hispanic children, where low household income was associated with a greater  
55  
56  
57  
58  
59  
60

1  
2  
3 206 intake of dietary sodium.<sup>(37)</sup> In a New Zealand food survey, low cost ‘home brand’ labelled  
4  
5 207 food products were found to contain greater quantities of sodium than the more expensive  
6  
7 208 branded food products.<sup>(38)</sup> The impact of income on sodium intake in Australian children  
8  
9  
10 209 remains unclear and further research is required.

11  
12  
13 210

14  
15  
16 211 Previous studies in children have reported socioeconomic differences in the consumption of  
17  
18 212 certain food groups.<sup>(39, 40)</sup> For example, in European children of low SES background, greater  
19  
20 213 intake of starchy foods, meat products, savoury snacks such as hamburgers, sugar and  
21  
22 214 confectionary, pizza, desserts and soft drinks have been reported.<sup>(39, 40)</sup> In the present study  
23  
24 215 those food groups which were found to contribute more sodium to the diets of low SES  
25  
26 216 children tended to include convenience style foods (i.e. pies/sausage rolls; savoury sauce and  
27  
28 217 casserole base sauces; fried prepared potato; processed meat; potato snacks). Comparably,  
29  
30 218 children of high SES background consumed greater amounts of sodium from cake and baked  
31  
32 219 type products. However, a significant amount of sodium in baked products can be in sodium  
33  
34 220 bicarbonate rather than in the form of sodium chloride. Sodium bicarbonate, unlike sodium  
35  
36 221 chloride, has not been directly associated with adverse blood pressure outcomes.<sup>(41)</sup>

37  
38  
39  
40  
41 222

42  
43  
44 223 With reference to sodium intake data by age group<sup>(5)</sup> and comparison to the recommended  
45  
46 224 daily Upper Limit of sodium<sup>(6)</sup> it is evident that Australian children of all ages across all SES  
47  
48 225 backgrounds are consuming too much dietary sodium. However, for the first time our  
49  
50 226 findings indicate that socioeconomic disparities exist in sodium intake in Australian children  
51  
52 227 aged 9-13 years. To reduce sodium intake in children a comprehensive approach is required,  
53  
54 228 firstly targeting food policy, to encourage product reformulation of lower sodium food



1  
2  
3 229 products across all price ranges within the food supply. Secondly, consumer education and  
4  
5 230 awareness campaigns, that encourage food choices which are based on fresh products with  
6  
7 231 minimal processing; this may require strategies that equip parents with enhanced food  
8  
9 232 preparation skills and knowledge of the 'hidden' salt added to many commonly eaten  
10  
11 233 processed foods. Furthermore, it is apparent that these strategies need to reach lower SES  
12  
13 234 groups.  
14  
15  
16  
17  
18  
19

20 236 The major strengths of this study include the use of a large nationally-representative sample  
21  
22 237 of Australian children, with comprehensive and standardised collection of dietary intake.  
23

24 238 Limitations of the study include the use of a 24-hr dietary recall to assess sodium intake.

25 239 Firstly, this method ~~which~~ fails to capture the amount of salt coming from salt added at the

26 240 table and during cooking and therefore is likely to underestimate the true value of salt

27 241 intake.<sup>(42)</sup> The majority (77%) of dietary sodium consumed is from salt added to processed

28 242 foods, whilst a smaller amount (11%) has been found to be derived from salt added at the

29 243 table and during cooking.<sup>(43)</sup> In the present study, the higher intake of sodium reported in

30 244 children from low SES background is attributable to differences in sodium intake from food

31 245 sources only. In a previous analysis of ~~these is~~ data, we found that children from low SES

32 246 background (~~3325~~%) were more likely to report adding salt at the table than children from

33 247 high SES (~~2533~~%).<sup>(26)</sup> Thus, it is likely that children of low SES background are consuming

34 248 greater amounts of total daily sodium than reported in the present analysis. Secondly,

35 249 assessment of sodium intake is limited by the quality of food composition databases, which

36 250 may not capture the variation in sodium content of different brand products within each food

37 251 group. <sup>(42, 44)</sup>

38  
39  
40  
41  
42  
43  
44  
45  
46  
47  
48  
49  
50  
51  
52  
53  
54  
55  
56  
57 252

1  
2  
3 253 | In summary, the findings of higher salt intakes from food sources in children of lower SES  
4  
5 254 background, within in a nationally representative sample, provides focus for concern  
6  
7 255 regarding salt related disease across the life course. This socioeconomic patterning of salt  
8  
9 256 intake may in turn influence the SES disparity seen in hypertension and cardiovascular risk in  
10  
11 257 adulthood. To reduce socioeconomic inequalities in health, interventions need to begin early  
12  
13 258 in life and should include product reformulation of lower sodium food products across all  
14  
15 259 price ranges, as well as consumer education and awareness campaigns which reach low SES  
16  
17 260 groups.  
18  
19  
20  
21  
22  
23

24 262 **Contributorship statement:** The author's responsibilities were as follows – CAG, KJC, LJR  
25  
26 263 and CAN designed research; CAG performed statistical analysis and wrote the manuscript  
27  
28 264 and is guarantor of the paper; LJR, KJC and CAN helped with data interpretation, revision of  
29  
30 265 manuscript and provided significant consultation. All authors have read and approved the  
31  
32 266 final manuscript.  
33  
34  
35

36 267 **Funding Statement:** This work was supported by a post graduate scholarship from the Heart  
37  
38 268 Foundation of Australia PP 08M 4074.  
39  
40  
41  
42  
43  
44  
45 270

**Table 1.** Basic characteristics of Australian children and adolescents aged 2-16 years (n 487)

| Characteristic                               | n or mean | % or SD |
|----------------------------------------------|-----------|---------|
| Male (n %)                                   | 2 249     | 51      |
| Age (years) (mean SD)                        | 9.1       | 4.3     |
| Age group (n %)                              |           |         |
| 2-3 years                                    | 1071      | 12      |
| 4-8 years                                    | 1216      | 34      |
| 9-13 years                                   | 1110      | 33      |
| 14-16 years                                  | 1090      | 21      |
| Socioeconomic status (n %)*                  |           |         |
| Low SES                                      | 1414      | 30      |
| Mid SES                                      | 1583      | 36      |
| High SES                                     | 1490      | 34      |
| Parental income (n %) <sup>†</sup>           |           |         |
| \$0 to 31 999                                | 500       | 11      |
| \$32 000 to 51 999                           | 732       | 17      |
| \$52 000 to 103 999                          | 1850      | 42      |
| \$≥104 000                                   | 1169      | 30      |
| Weight status (n %) <sup>‡</sup>             |           |         |
| Underweight                                  | 212       | 5       |
| Healthy weight                               | 3267      | 72      |
| Overweight                                   | 761       | 17      |
| Obese                                        | 247       | 6       |
| Energy (kJ/d) (mean SD)                      | 8392      | 3156    |
| Sodium (mg/d) (mean SD)                      | 2473      | 1243    |
| Salt equivalent (g/d) (mean SD) <sup>§</sup> | 6.3       | 3.1     |

‡ SES as defined by the highest level of education attained by the primary carer

<sup>†</sup>Participants with missing information for parental income (n=236) excluded

1  
2  
3  
4  
5  
6  
7  
8  
9  
10  
11  
12  
13  
14  
15  
16  
17  
18  
19  
20  
21  
22  
23  
24  
25  
26  
27  
28  
29  
30  
31  
32  
33  
34  
35  
36  
37  
38  
39  
40  
41  
42  
43  
44  
45  
46  
47  
48  
49  
50  
51  
52  
53  
54  
55  
56  
57  
58  
59  
60

‡Weight classification based on the International Obesity Task Force BMI reference cut offs

(30, 31)

§Salt equivalents (i.e. sodium chloride: 1 g = 390 mg sodium)

For peer review only

1  
2  
3 **Figure 1.** Mean sodium intake (mg/d) by socioeconomic group (n = 4487)<sup>†‡</sup>  
4  
5

6 **[JPEG IMAGE ATTACHED]**  
7  
8  
9

10  
11  
12  
13  
14  
15  
16  
17  
18 \* Significantly different from high SES ( $P < 0.001$ )  
19

20  
21 \*\* Significantly different from high SES ( $P < 0.05$ )  
22

23  
24 †SES as defined by the highest level of education attained by the primary carer  
25  
26  
27  
28  
29  
30  
31  
32  
33  
34  
35  
36  
37  
38  
39  
40  
41  
42  
43  
44  
45  
46  
47  
48  
49  
50  
51  
52  
53  
54  
55  
56  
57  
58  
59  
60

1  
2  
3  
4  
5  
6  
7  
8  
9  
10  
11  
12  
13  
14  
15  
16  
17  
18  
19  
20  
21  
22  
23  
24  
25  
26  
27  
28  
29  
30  
31  
32  
33  
34  
35  
36  
37  
38  
39  
40  
41  
42  
43  
44  
45  
46  
47  
48  
49

**Table 2.** Association between socioeconomic status (SES) and dietary sodium intake (390 mg/d) (1 g/d salt) in Australian children and adolescents aged 2-16 years (n 4 487) ¶ †

| Variable             | Total Sample (n=4 487) |         | Age group‡            |         |                       |         |
|----------------------|------------------------|---------|-----------------------|---------|-----------------------|---------|
|                      |                        |         | 4-8 years (n=1 216)   |         | 9-13 years (n=1 110)  |         |
|                      | $\beta$ (95% CI)       | P Value | $\beta$ (95% CI)      | P Value | $\beta$ (95% CI)      | P Value |
| <b>Unadjusted</b>    |                        |         |                       |         |                       |         |
| High SES (reference) |                        |         |                       |         |                       |         |
| Mid SES              | 0.3 (0.03, 0.5)        | 0.03    | 0.2 (-0.1, 0.6)       | 0.17    | 0.2 (-0.2, 0.6)       | 0.319   |
| Low SES              | 0.5 (0.3, 0.8)         | <0.001  | 0.5 (0.1, 1.0)        | 0.02    | 0.5 (-0.02, 1.0)      | 0.06    |
|                      | R <sup>2</sup> =0.004  | <0.01   | R <sup>2</sup> =0.008 | 0.05    | R <sup>2</sup> =0.004 | 0.16    |
| <b>Adjusted§</b>     |                        |         |                       |         |                       |         |

|                      |                      |        |                      |        |                      |        |
|----------------------|----------------------|--------|----------------------|--------|----------------------|--------|
| High SES (reference) |                      |        |                      |        |                      |        |
| Mid SES              | 0.2 (0.01, 0.4)      | 0.04   | 0.2 (-0.1, 0.4)      | 0.13   | 0.2 (-0.2, 0.6)      | 0.23   |
| Low SES              | 0.5 (0.2, 0.7)       | <0.001 | 0.6 (0.2, 0.9)       | 0.001  | 0.6 (0.1, 1.0)       | 0.01   |
|                      | R <sup>2</sup> =0.49 | <0.001 | R <sup>2</sup> =0.37 | <0.001 | R <sup>2</sup> =0.36 | <0.001 |

¶ Dependent variable is sodium intake in units of 390 mg/d (salt equivalent 1 g/d) and independent variable is SES entered as an indicator variable: high SES is the reference category

†SES as defined by the highest level of education attained by the primary carer

‡No association between salt intake and SES in age groups 2-3 years and 14-16 years (models not shown)

§Adjusted for gender, age, energy intake and BMI

**Table 3.** Dietary sources of sodium intake listed by their contribution to intake for the group and mean daily sodium intake by food group, by socioeconomic group¶

| Food group                                           | Total sample<br>(n 4487)                       | SES Group†               |                          |                          | P value‡    |
|------------------------------------------------------|------------------------------------------------|--------------------------|--------------------------|--------------------------|-------------|
|                                                      |                                                | Low (n 1414)             | Mid (n 1583)             | High (n 1490)            |             |
|                                                      | % contribution to total<br>daily sodium intake | Mean sodium<br>(SD) mg/d | Mean sodium<br>(SD) mg/d | Mean sodium<br>(SD) mg/d |             |
| Regular breads and bread rolls                       | 13.4                                           | 340 (315)                | 330 (300)                | 324 (317)                | 0.26        |
| Mixed dishes where cereal is the<br>major ingredient | 8.7                                            | 214 (514)                | 256 (616)                | 172 (445)                | 0.07        |
| <b>Processed meat§</b>                               | <b>7.6</b>                                     | <b>216 (464)</b>         | <b>180 (403)</b>         | <b>168 (368)</b>         | <b>0.02</b> |
| <b>Gravies and savoury sauces□</b>                   | <b>6.5</b>                                     | <b>182 (385)</b>         | <b>166 (395)</b>         | <b>139 (354)</b>         | <b>0.01</b> |
| <b>Pastries¶</b>                                     | <b>4.9</b>                                     | <b>135 (400)</b>         | <b>120 (352)</b>         | <b>109 (345)</b>         | <b>0.03</b> |



|                                                                 |            |                  |                  |                 |             |
|-----------------------------------------------------------------|------------|------------------|------------------|-----------------|-------------|
| Cheese                                                          | 4.6        | 114 (209)        | 110 (190)        | 116 (186)       | 0.80        |
| <b>Breakfast cereals and bars</b>                               | <b>4.2</b> | <b>113 (176)</b> | <b>101 (166)</b> | <b>97 (161)</b> | <b>0.03</b> |
| Dairy milk                                                      | 3.9        | 95 (106)         | 94 (103)         | 100 (98)        | 0.25        |
| Herbs, spices, seasonings and<br>stock cubes                    | 3.7        | 114 (482)        | 75 (246)         | 90 (301)        | 0.31        |
| Sausages, frankfurts and saveloys                               | 2.9        | 79 (259)         | 74 (136)         | 61 (201)        | 0.07        |
| Mixed dishes where poultry/game<br>is the major component       | 2.6        | 79 (268)         | 59 (194)         | 60 (238)        | 0.09        |
| Soup (prepared, ready to eat)                                   | 2.6        | 51 (288)         | 74 (379)         | 65 (282)        | 0.25        |
| English-style muffins, flat breads,<br>and savoury sweet breads | 2.4        | 55 (158)         | 58 (180)         | 67 (181)        | 0.17        |
| <b>Cakes, buns, muffins, scones,</b>                            | <b>2.3</b> | <b>54 (153)</b>  | <b>52 (144)</b>  | <b>68 (176)</b> | <b>0.02</b> |

---

|                                                                 |            |                 |                 |                 |             |
|-----------------------------------------------------------------|------------|-----------------|-----------------|-----------------|-------------|
| <b>cake-type desserts</b>                                       |            |                 |                 |                 |             |
| Savoury biscuits                                                | 2.2        | 49 (136)        | 57 (147)        | 57 (152)        | 0.34        |
| Yeast, yeast, vegetable and meat<br>extracts                    | 2.0        | 47 (117)        | 55 (143)        | 45 (108)        | 0.70        |
| <b>Potatoes</b> ¶ ¶ ¶                                           | <b>1.9</b> | <b>53 (128)</b> | <b>51 (127)</b> | <b>38 (106)</b> | <b>0.01</b> |
| <b>Batter-based products</b> ††                                 | <b>1.7</b> | <b>38 (161)</b> | <b>37 (150)</b> | <b>50 (180)</b> | <b>0.05</b> |
| <b>Potato snacks</b>                                            | <b>1.7</b> | <b>51 (149)</b> | <b>40 (121)</b> | <b>35 (125)</b> | <b>0.03</b> |
| Pasta and pasta products                                        | 1.4        | 35 (142)        | 32 (130)        | 35 (138)        | 0.89        |
| Sweet biscuits                                                  | 1.2        | 29 (64)         | 33 (72)         | 27 (62)         | 0.61        |
| Mixed dishes where beef, veal or<br>lamb is the major component | 1.1        | 32 (175)        | 21 (116)        | 28 (56)         | 0.53        |
| Mature legumes and pulse                                        | 1.0        | 21 (149)        | 21 (137)        | 35 (258)        | 0.12        |

---

1  
2  
3  
4  
5 products and dishes  
6  
7

---

8 ¶ Includes those sub-major food group categories that contribute >1.0% of sodium to daily intake ambiguous  
9

10  
11 †SES as defined by the highest level of education attained by the primary carer  
12

13  
14 ‡Means are compared between low and high SES groups using independent T-test  
15

16  
17 §includes ham, bacon and processed delicatessen meat  
18

19  
20 □includes pasta sauces and casserole bases  
21

22  
23 ¶includes pies and sausage rolls  
24

25  
26 ¶ ¶ includes potato gems and wedges  
27

28  
29 ††includes pancakes and pikelets  
30  
31  
32  
33  
34  
35  
36  
37  
38  
39  
40  
41  
42  
43  
44  
45  
46  
47  
48  
49

1  
2  
3  
4  
5  
6  
7  
8  
9  
10  
11  
12  
13  
14  
15  
16  
17  
18  
19  
20  
21  
22  
23  
24  
25  
26  
27  
28  
29  
30  
31  
32  
33  
34  
35  
36  
37  
38  
39  
40  
41  
42  
43  
44  
45  
46  
47  
48  
49  
50  
51  
52  
53  
54  
55  
56  
57  
58  
59  
60

For peer review only

**REFERENCES**

1. Dickinson BD, Havas S. Reducing the population burden of cardiovascular disease by reducing sodium intake. *Arch Intern Med* 2007;**167**:1460-68.
2. He FJ, MacGregor GA. Importance of Salt in Determining Blood Pressure in Children Meta-Analysis of Controlled Trials. *Hypertension* 2006;**48**:861-69.
3. He FJ, Marrero NM, MacGregor GA. Salt and blood pressure in children and adolescents. *J Hum Hyperten* 2008;**22**:4-11.
4. Brown IJ, Tzoulaki I, Candeias V, et al. Salt intakes around the world: implications for public health. *Int J Epidemiol* 2009;**38**:791-813.
5. Department of Health and Ageing, Australian Food and Grocery Council, Department of Agriculture Fisheries and Forestry. 2007 Australian National Children's Nutrition and Physical Activity Survey - Main Findings. Canberra: Commonwealth of Australia, 2008. Available from:  
[http://www.health.gov.au/internet/main/publishing.nsf/content/66596E8FC68FD1A3CA2574D50027DB86/\\$File/childrens-nut-phys-survey.pdf](http://www.health.gov.au/internet/main/publishing.nsf/content/66596E8FC68FD1A3CA2574D50027DB86/$File/childrens-nut-phys-survey.pdf).
6. National Health and Medical Research Council. Nutrient reference values for Australia and New Zealand. Canberra: Australian Government. Department of Health and Ageing, 2006. Available from:  
[http://www.nhmrc.gov.au/files\\_nhmrc/publications/attachments/n35.pdf](http://www.nhmrc.gov.au/files_nhmrc/publications/attachments/n35.pdf).
7. Chen X, Wang Y. Tracking of blood pressure from childhood to adulthood A systematic review and meta-regression analysis. *Circulation* 2008;**117**:3171-80.
8. Toschke AM, Kohl L, Mansmann U, et al. Meta-analysis of blood pressure tracking from childhood to adulthood and implications for the design of intervention trials. *Acta Paediatrica* 2010;**99**:24-29.

- 1  
2  
3 9. Kaplan GA, Keil JE. Socioeconomic factors and cardiovascular disease: a review of the  
4  
5 literature. *Circulation* 1993;**88**:1973-98.  
6
- 7  
8 10. Rosengren A, Subramanian SV, Islam S, et al. Education and risk for acute myocardial  
9  
10 infarction in 52 high, middle and low-income countries: INTERHEART case-control  
11  
12 study. *Heart* 2009;**95**:2014-22.  
13
- 14 11. Loucks EB, Lynch JW, Pilote L, et al. Life-course socioeconomic position and incidence  
15  
16 of coronary heart disease: the Framingham Offspring Study. *Am J Epidemiol*  
17  
18 2009;**169**:829-36.  
19
- 20 12. Pollitt RA, Rose KM, Kaufman JS. Evaluating the evidence for models of life course  
21  
22 socioeconomic factors and cardiovascular outcomes: a systematic review. *BMC*  
23  
24 *Public Health* 2005;**5**:7.  
25  
26
- 27 13. Darmon N, Drewnowski A. Does social class predict diet quality? *Am J Clin Nutr*  
28  
29 2008;**87**:1107-17.  
30  
31
- 32 14. Giskes K, Turrell G, Patterson C, et al. Socio-economic differences in fruit and vegetable  
33  
34 consumption among Australian adolescents and adults. *Public Health Nutr*  
35  
36 2002;**5**:663-69.  
37
- 38 15. Hulshof KFAM, Brussaard JH, Kruijzinga AG, et al. Socio-economic status, dietary intake  
39  
40 and 10 y trends: the Dutch National Food Consumption Survey. *Eur J Clin Nutr*  
41  
42 2003;**57**:128-37.  
43  
44
- 45 16. Ambrosini GL, Oddy WH, Robinson M, et al. Adolescent dietary patterns are associated  
46  
47 with lifestyle and family psycho-social factors. *Public Health Nutr* 2009;**12**:1807-15.  
48
- 49 17. Haapalahti M, Mykkanen H, Tikkanen S, et al. Meal patterns and food use in 10- to 11-  
50  
51 year old Finnish children. *Public Health Nutr* 2002;**6**:365-70.  
52  
53
- 54 18. Neumark-Sztainer D, Wall M, Perry C, et al. Correlates of fruit and vegetable intake  
55  
56 among adolescents Findings from Project EAT. *Prev Med* 2003;**37**:198-208.  
57  
58

- 1  
2  
3 19. Utter J, Denny S, Crengle S, et al. Socio-economic differences in eating-related attitudes,  
4 behaviours and environments of adolescents. *Public Health Nutr* 2010;**14**:629-34.  
5  
6  
7 20. Wardle J, Jarvis MJ, Steggle N, et al. Socioeconomic disparities in cancer-risk  
8 behaviours in adolescence: baseline results from the Health and Behaviour in  
9 Teenagers Study (HABITS). *Prev Med* 2003;**36**:721-30.  
10  
11  
12 21. Dubois L, Farmer A, Girard M, et al. Demographic and socio-economic factors related to  
13 food intake and adherence to nutritional recommendations in a cohort of pre-school  
14 children. *Public Health Nutr* 2011;**14**:1096-104.  
15  
16  
17 22. Bates CJ, Prentice A, Cole TJ, et al. Micronutrients: highlights and research challenges  
18 from the 1994–5 National Diet and Nutrition Survey of people aged 65 years and  
19 over. *Brit J Nutr* 1999;**82**:7-15.  
20  
21  
22 23. Gerber AM, James SA, Ammerman AS, et al. Socioeconomic status and electrolyte  
23 intake in black adults: the Pitt country Study. *Am J Public Health* 1991;**81**:1608-12.  
24  
25  
26 24. Department of Health and Ageing. User Guide 2007 Australian National Children's  
27 Nutrition and Physical Activity Survey. Canberra: 2010. Available from:  
28  
29  
30 <http://www.health.gov.au/internet/main/publishing.nsf/Content/AC3F256C715674D5>  
31  
32 [CA2574D60000237D/\\$File/user-guide-v2.pdf](http://www.health.gov.au/internet/main/publishing.nsf/Content/AC3F256C715674D5).  
33  
34  
35 25. Food Standards Australian and New Zealand [Internet]. Canberra: Food Standards  
36 Australia and New Zealand; [cited 2009 Jan 23]. Available from:  
37  
38 <http://www.foodstandards.gov.au/consumerinformation/ausnut2007/>.  
39  
40  
41 26. Grimes CA, Campbell KJ, Riddell LJ, et al. Sources of sodium in Australian children's  
42 diets and the effect of the application of sodium targets to food products to reduce  
43 sodium intake. *Br J Nutr* 2011;**105**:468-77.  
44  
45  
46 27. Cameron AJ, Ball K, Pearson N, et al. Socioeconomic variation in diet and activity-  
47 related behaviours of Australian children and adolescents  
48  
49  
50  
51  
52  
53  
54  
55  
56  
57  
58  
59  
60

- 1  
2  
3 aged 2–16 years. *Pediatr Obes* 2010;**7**:329-42.
- 4  
5 28. Golley RK, Hendrie GA, McNaughton SA. Scores on the Dietary Guideline Index for  
6  
7 Children and Adolescents Are Associated with Nutrient Intake and Socio-Economic  
8  
9 position but Not Adiposity. *J Nutr* 2011;**141**:1340-7.
- 10  
11 29. Marfell-Jones M, Olds T, Stewart A, et al. International standards for anthropometric  
12  
13 assessment. Potchefstroom, South Africa: International standards for anthropometric  
14  
15 assessment,, 2006. Available from:
- 16  
17 30. Cole TJ. Establishing a standard definition for child overweight and obesity worldwide:  
18  
19 international survey. *Br Med J* 2000;**320**:1-6.
- 20  
21 31. Cole TJ, Flegal KM, Nicholls D, et al. Body mass index cut offs to define thinness in  
22  
23 children and adolescents: international survey. *Brit Med J* 2007;**335**:194-7.
- 24  
25 32. Krebs-Smith SM, Kott PS, Guenther PM. Mean proportion and population proportion:  
26  
27 two answers to the same question? *J Am Diet Assoc* 1989;**89**:667-72.
- 28  
29 33. Purdy J, Armstrong G, McIlveen H. The influence of socio-economic status on salt  
30  
31 consumption in Northern Ireland. *International Journal of Consumer Studies*  
32  
33 2002;**26**:71-80.
- 34  
35 34. Van der Veen JE, Graaf CD, Van Dis SJ, et al. Determinants of salt use in cooked meals  
36  
37 in the Netherlands: attitudes and practices of food preparers. *Eur J Clin Nutr*  
38  
39 1999;**53**:388-94.
- 40  
41 42 35. Okubo H, Miyake Y, Sasaki S, et al. Dietary patterns in infancy and their associations  
43  
44 with maternal socio-economic and lifestyle factors among 758 Japanese mother–child  
45  
46 pairs: the Osaka Maternal and Child Health Study. *Matern Child Nutr*  
47  
48 2012;**8**:doi:10.1111/j.740-8709.2012.00403.x.
- 49  
50 51 36. Story M, Neumark-Sztainer D, French S. Individual and environmental influences on  
52  
53 adolescent eating behaviours. *J Am Diet Assoc* 2002;**102**:S40-S51.
- 54  
55  
56  
57  
58  
59  
60



- 1  
2  
3 37. Mazur RE, Marquis GS, Jensen HH. Diet and food insufficiency among Hispanic youths:  
4  
5 acculturation and socioeconomic factors in the third National Health and Nutrition  
6  
7 Examination Survey. *Am J Clin Nutr* 2003;**78**:1120-27.  
8  
9  
10 38. Monro D, Young L, Wilson J, et al. The sodium content of low cost and private label  
11  
12 foods; implications for public health. *Journal of the New Zealand Dietetic Association*  
13  
14 2004;**58**:4-10.  
15  
16 39. Lioret S, Dubuisson C, Dufour A, et al. Trends in food intake in French children from  
17  
18 1999 to 2007: results from the INCA (etude Individuelle Nationale des  
19  
20 Consommations Alimentaires) dietary surveys. *Brit J Nutr* 2010;**103**:585-601.  
21  
22  
23 40. Sausenthaler S, Standl M, Buyken A, et al. Regional and socio-economic differences in  
24  
25 food, nutrient and supplement intake in school-age children in Germany: results from  
26  
27 the GINIplus and the LISApplus studies. *Public Health Nutr* 2011;**10**:1724-35.  
28  
29  
30 41. McCarty MF. Should we restrict chloride rather than sodium? *Med Hypotheses*  
31  
32 2004;**63**:138-48.  
33  
34 42. Loria CM, Obarzanek E, Ernst ND. The Dietary Guidelines: Surveillance Issues and  
35  
36 Research Needs. Choose and Prepare Foods with Less Salt: Dietary Advice for All  
37  
38 Americans. *J Nutr* 2001;**131**:536S-51S.  
39  
40  
41 43. Mattes RD, Donnelly D. Relative contributions of dietary sodium sources. *J Am Coll*  
42  
43 *Nutr* 1991;**10**:383-93.  
44  
45 44. World Health Organization. Creating an enabling environment for population-based salt  
46  
47 reduction strategies. United Kingdom: World Health Organization, 2010. Available  
48  
49 from:  
50  
51  
52  
53  
54  
55  
56  
57  
58  
59  
60

1  
2  
3  
4  
5  
6  
7  
8  
9  
10  
11  
12  
13  
14  
15  
16  
17  
18  
19  
20  
21  
22  
23  
24  
25  
26  
27  
28  
29  
30  
31  
32  
33  
34  
35  
36  
37  
38  
39  
40  
41  
42  
43  
44  
45  
46  
47  
48  
49  
50  
51  
52  
53  
54  
55  
56  
57  
58  
59  
60



\* Significantly different from high SES (P <0.001)  
\*\* Significantly different from high SES (P <0.05)  
†SES as defined by the highest level of education attained by the primary carer  
220x176mm (72 x 72 DPI)

View only

## STROBE Statement—checklist of items that should be included in reports of observational studies

|                              | Item No | Recommendation                                                                                                                                                                                                                                                                                                                                                                                                                                                                                                                                                                                                                                                                                   |
|------------------------------|---------|--------------------------------------------------------------------------------------------------------------------------------------------------------------------------------------------------------------------------------------------------------------------------------------------------------------------------------------------------------------------------------------------------------------------------------------------------------------------------------------------------------------------------------------------------------------------------------------------------------------------------------------------------------------------------------------------------|
| <b>Title and abstract</b>    | 1       | (a) Indicate the study's design with a commonly used term in the title or the abstract<br>(b) Provide in the abstract an informative and balanced summary of what was done and what was found                                                                                                                                                                                                                                                                                                                                                                                                                                                                                                    |
| <b>Introduction</b>          |         |                                                                                                                                                                                                                                                                                                                                                                                                                                                                                                                                                                                                                                                                                                  |
| Background/rationale         | 2       | Explain the scientific background and rationale for the investigation being reported                                                                                                                                                                                                                                                                                                                                                                                                                                                                                                                                                                                                             |
| Objectives                   | 3       | State specific objectives, including any prespecified hypotheses                                                                                                                                                                                                                                                                                                                                                                                                                                                                                                                                                                                                                                 |
| <b>Methods</b>               |         |                                                                                                                                                                                                                                                                                                                                                                                                                                                                                                                                                                                                                                                                                                  |
| Study design                 | 4       | Present key elements of study design early in the paper                                                                                                                                                                                                                                                                                                                                                                                                                                                                                                                                                                                                                                          |
| Setting                      | 5       | Describe the setting, locations, and relevant dates, including periods of recruitment, exposure, follow-up, and data collection                                                                                                                                                                                                                                                                                                                                                                                                                                                                                                                                                                  |
| Participants                 | 6       | (a) <i>Cohort study</i> —Give the eligibility criteria, and the sources and methods of selection of participants. Describe methods of follow-up<br><i>Case-control study</i> —Give the eligibility criteria, and the sources and methods of case ascertainment and control selection. Give the rationale for the choice of cases and controls<br><i>Cross-sectional study</i> —Give the eligibility criteria, and the sources and methods of selection of participants<br>(b) <i>Cohort study</i> —For matched studies, give matching criteria and number of exposed and unexposed<br><i>Case-control study</i> —For matched studies, give matching criteria and the number of controls per case |
| Variables                    | 7       | Clearly define all outcomes, exposures, predictors, potential confounders, and effect modifiers. Give diagnostic criteria, if applicable                                                                                                                                                                                                                                                                                                                                                                                                                                                                                                                                                         |
| Data sources/<br>measurement | 8*      | For each variable of interest, give sources of data and details of methods of assessment (measurement). Describe comparability of assessment methods if there is more than one group                                                                                                                                                                                                                                                                                                                                                                                                                                                                                                             |
| Bias                         | 9       | Describe any efforts to address potential sources of bias                                                                                                                                                                                                                                                                                                                                                                                                                                                                                                                                                                                                                                        |
| Study size                   | 10      | Explain how the study size was arrived at                                                                                                                                                                                                                                                                                                                                                                                                                                                                                                                                                                                                                                                        |
| Quantitative variables       | 11      | Explain how quantitative variables were handled in the analyses. If applicable, describe which groupings were chosen and why                                                                                                                                                                                                                                                                                                                                                                                                                                                                                                                                                                     |
| Statistical methods          | 12      | (a) Describe all statistical methods, including those used to control for confounding<br>(b) Describe any methods used to examine subgroups and interactions<br>(c) Explain how missing data were addressed<br>(d) <i>Cohort study</i> —If applicable, explain how loss to follow-up was addressed<br><i>Case-control study</i> —If applicable, explain how matching of cases and controls was addressed<br><i>Cross-sectional study</i> —If applicable, describe analytical methods taking account of sampling strategy<br>(e) Describe any sensitivity analyses                                                                                                                                |

Continued on next page

1  
2  
3  
4  
5  
6  
7  
8  
9  
10  
11  
12  
13  
14  
15  
16  
17  
18  
19  
20  
21  
22  
23  
24  
25  
26  
27  
28  
29  
30  
31  
32  
33  
34  
35  
36  
37  
38  
39  
40  
41  
42  
43  
44  
45  
46  
47  
48  
49  
50  
51  
52  
53  
54  
55  
56  
57  
58  
59  
60**Results**

|                  |     |                                                                                                                                                                                                                                                                                                                                                                                                               |
|------------------|-----|---------------------------------------------------------------------------------------------------------------------------------------------------------------------------------------------------------------------------------------------------------------------------------------------------------------------------------------------------------------------------------------------------------------|
| Participants     | 13* | (a) Report numbers of individuals at each stage of study—eg numbers potentially eligible, examined for eligibility, confirmed eligible, included in the study, completing follow-up, and analysed<br>(b) Give reasons for non-participation at each stage<br>(c) Consider use of a flow diagram                                                                                                               |
| Descriptive data | 14* | (a) Give characteristics of study participants (eg demographic, clinical, social) and information on exposures and potential confounders<br>(b) Indicate number of participants with missing data for each variable of interest<br>(c) <i>Cohort study</i> —Summarise follow-up time (eg, average and total amount)                                                                                           |
| Outcome data     | 15* | <i>Cohort study</i> —Report numbers of outcome events or summary measures over time<br><i>Case-control study</i> —Report numbers in each exposure category, or summary measures of exposure<br><i>Cross-sectional study</i> —Report numbers of outcome events or summary measures                                                                                                                             |
| Main results     | 16  | (a) Give unadjusted estimates and, if applicable, confounder-adjusted estimates and their precision (eg, 95% confidence interval). Make clear which confounders were adjusted for and why they were included<br>(b) Report category boundaries when continuous variables were categorized<br>(c) If relevant, consider translating estimates of relative risk into absolute risk for a meaningful time period |
| Other analyses   | 17  | Report other analyses done—eg analyses of subgroups and interactions, and sensitivity analyses                                                                                                                                                                                                                                                                                                                |

**Discussion**

|                  |    |                                                                                                                                                                            |
|------------------|----|----------------------------------------------------------------------------------------------------------------------------------------------------------------------------|
| Key results      | 18 | Summarise key results with reference to study objectives                                                                                                                   |
| Limitations      | 19 | Discuss limitations of the study, taking into account sources of potential bias or imprecision. Discuss both direction and magnitude of any potential bias                 |
| Interpretation   | 20 | Give a cautious overall interpretation of results considering objectives, limitations, multiplicity of analyses, results from similar studies, and other relevant evidence |
| Generalisability | 21 | Discuss the generalisability (external validity) of the study results                                                                                                      |

**Other information**

|         |    |                                                                                                                                                               |
|---------|----|---------------------------------------------------------------------------------------------------------------------------------------------------------------|
| Funding | 22 | Give the source of funding and the role of the funders for the present study and, if applicable, for the original study on which the present article is based |
|---------|----|---------------------------------------------------------------------------------------------------------------------------------------------------------------|

\*Give information separately for cases and controls in case-control studies and, if applicable, for exposed and unexposed groups in cohort and cross-sectional studies.

**Note:** An Explanation and Elaboration article discusses each checklist item and gives methodological background and published examples of transparent reporting. The STROBE checklist is best used in conjunction with this article (freely available on the Web sites of PLoS Medicine at <http://www.plosmedicine.org/>, Annals of Internal Medicine at <http://www.annals.org/>, and Epidemiology at <http://www.epidem.com/>). Information on the STROBE Initiative is available at [www.strobe-statement.org](http://www.strobe-statement.org).

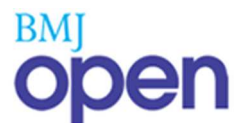

**Is socioeconomic status associated with dietary sodium intake in Australian children? A cross-sectional study**

|                                 |                                                                                                                                                                                                                                                                |
|---------------------------------|----------------------------------------------------------------------------------------------------------------------------------------------------------------------------------------------------------------------------------------------------------------|
| Journal:                        | <i>BMJ Open</i>                                                                                                                                                                                                                                                |
| Manuscript ID:                  | bmjopen-2012-002106.R2                                                                                                                                                                                                                                         |
| Article Type:                   | Research                                                                                                                                                                                                                                                       |
| Date Submitted by the Author:   | 16-Jan-2013                                                                                                                                                                                                                                                    |
| Complete List of Authors:       | Grimes, Carley; Deakin University, Centre of Physical Activity and Nutrition Research<br>Campbell, Karen; Deakin University, CPAN<br>Riddell, Lynn; Deakin University, Centre of Physical Activity and Nutrition Sciences<br>Nowson, Caryl; Deakin University, |
| <b>Primary Subject Heading</b>: | Public health                                                                                                                                                                                                                                                  |
| Secondary Subject Heading:      | Paediatrics, Cardiovascular medicine, Epidemiology, Nutrition and metabolism                                                                                                                                                                                   |
| Keywords:                       | NUTRITION & DIETETICS, Community child health < PAEDIATRICS, EPIDEMIOLOGY                                                                                                                                                                                      |
|                                 |                                                                                                                                                                                                                                                                |

SCHOLARONE™  
Manuscripts

1  
2  
3 **Is socioeconomic status associated with dietary sodium intake in Australian children? A**  
4 **cross-sectional study**  
5  
6

7  
8 Carley A. Grimes<sup>1</sup>, Karen J Campbell<sup>2</sup>, Lynn J Riddell<sup>3</sup>, Caryl A. Nowson<sup>4</sup>  
9

10  
11  
12  
13  
14 <sup>1</sup> Carley A. Grimes, Centre for Physical Activity and Nutrition Research, School of Exercise  
15 and Nutrition Sciences, Deakin University, 221 Burwood Highway, Burwood, Victoria 3125,  
16  
17  
18  
19 Australia.

20  
21  
22 <sup>2</sup> Karen J. Campbell, Centre for Physical Activity and Nutrition Research, School of Exercise  
23 and Nutrition Sciences, Deakin University, 221 Burwood Highway, Burwood, Victoria 3125,  
24  
25  
26  
27 Australia.

28  
29 <sup>3</sup> Lynn J Riddell, Centre for Physical Activity and Nutrition Research, School of Exercise and  
30 Nutrition Sciences, Deakin University, 221 Burwood Highway, Burwood, Victoria 3125,  
31  
32  
33  
34 Australia.

35  
36  
37 <sup>4</sup> Caryl A. Nowson, Centre for Physical Activity and Nutrition Research, School of Exercise  
38 and Nutrition Sciences, Deakin University, 221 Burwood Highway, Burwood, Victoria 3125,  
39  
40  
41  
42 Australia. Tel: 613 9251 7272. Fax: 613 9244 6017. E-mail: [nowson@deakin.edu.au](mailto:nowson@deakin.edu.au)  
43

44 **Corresponding author & Reprints:**  
45

46  
47 Carley A. Grimes, Centre for Physical Activity and Nutrition Research, School of Exercise  
48 and Nutrition Sciences, Deakin University, 221 Burwood Highway, Burwood, Victoria 3125,  
49  
50  
51  
52 Australia. Tel: 613 9251 7272. Fax: 613 9244 6017. E-mail: [carley.grimes@deakin.edu.au](mailto:carley.grimes@deakin.edu.au)  
53  
54  
55  
56  
57

**Short title:**

Dietary sodium intake and socioeconomic status in Australian children

**Key words:**

Sodium, Dietary; Sodium Chloride; Socioeconomic Status; Child; Australia

**Word count:** 2651

**Declaration of competing interests:**

All authors have completed the Unified Competing Interest form at [www.icmje.org/coi\\_disclosure.pdf](http://www.icmje.org/coi_disclosure.pdf) (available on request from the corresponding author) and declare: Carley Grimes had financial support in the form of a post graduate scholarship from the Heart Foundation, Australia for the submitted work; and had no financial relationships with any organisations that might have an interest in the submitted work in the previous three years, no other relationships or activities that could appear to have influenced the submitted work. Karen Campbell had no support from any organisation for the submitted work; no other relationships or activities that could appear to have influenced the submitted work. Caryl Nowson has received research funds from Meat & Livestock Australia; National Health and Medical Research Council, Wicking Foundation, National Heart Foundation, Australia, Helen MacPerhson Smith Trust and Red Cross Blood Bank. These payments are unrelated to the submitted work. Lynn Riddell has received research funds from Meat & Livestock Australia. These payments are unrelated to the submitted work.

1  
2  
3  
4  
5  
6  
7  
8  
9  
10  
11  
12  
13  
14  
15  
16  
17  
18  
19  
20  
21  
22  
23  
24  
25  
26  
27  
28  
29  
30  
31  
32  
33  
34  
35  
36  
37  
38  
39  
40  
41  
42  
43  
44  
45  
46  
47  
48  
49  
50  
51  
52  
53  
54  
55  
56  
57  
58  
59  
60

**Data sharing statement:**

The authors declare that on request all data files are available for analysis from the corresponding author at [carley.grimes@deakin.edu.au](mailto:carley.grimes@deakin.edu.au)

For peer review only



1  
2  
3 **1 ABSTRACT**  
4

5  
6 **2 Objective:** To assess the association between socioeconomic status (SES) and dietary sodium  
7  
8 intake, and identify if the major dietary sources of sodium differ by socioeconomic group in a  
9  
10 nationally representative sample of Australian children.  
11

12  
13 **5 Design:** Cross-sectional survey.  
14

15  
16 **6 Setting:** 2007 Australian National Children's Nutrition and Physical Activity Survey.  
17  
18

19  
20 **7 Participants:** A total of 4487 children aged 2-16 years completed all components of the  
21  
22 survey.  
23

24  
25 **9 Primary and secondary outcome measures:** Sodium intake was determined via one 24-hr  
26  
27 dietary recall. The population proportion formula was used to identify the major sources of  
28  
29 dietary salt. SES was defined by the level of education attained by the primary carer. In  
30  
31 addition parental income was used as a secondary indicator of SES.  
32  
33

34  
35 **13 Results:** Dietary sodium intake of children of low SES background was 2576 (SEM 42) mg/d  
36  
37 (salt equivalent 6.6 (0.1) g/d) which was greater than children of high SES background 2370  
38  
39 (35) mg/d (salt 6.1 (0.09) g/d) ( $P<0.001$ ). After adjustment for age, gender, energy intake  
40  
41 and body mass index, low SES children consumed 195 mg/d (salt 0.5 g/d) more sodium than  
42  
43 high SES children ( $P<0.001$ ). Low SES children had a greater intake of sodium from  
44  
45 processed meat, gravies/sauces, pastries, breakfast cereals, potatoes and potato snacks (all  
46  
47  $P<0.05$ ).  
48  
49

50  
51 **20 Conclusion:** Australian children from a low SES background have on average a 9% greater  
52  
53 intake of sodium from food sources compared to those from a high SES background.  
54  
55

1  
2  
3  
4  
5  
6  
7  
8  
9  
10  
11  
12  
13  
14  
15  
16  
17  
18  
19  
20  
21  
22  
23  
24  
25  
26  
27  
28  
29  
30  
31  
32  
33  
34  
35  
36  
37  
38  
39  
40  
41  
42  
43  
44  
45  
46  
47  
48  
49  
50  
51  
52  
53  
54  
55  
56  
57  
58  
59  
60

22 Understanding the socioeconomic patterning of salt intake during childhood should be  
23 considered in interventions to reduce cardiovascular disease.

For peer review only

1  
2  
3 24 **Article summary:**  
4  
5

6 25 **Article focus**  
7

- 8  
9 26 • To assess the association between socioeconomic status (SES) and dietary sodium intake  
10  
11 27 in Australian children and adolescents.  
12  
13  
14 28 • To determine if the major dietary sources of sodium differ by socioeconomic group.  
15  
16

17 29 **Key messages**  
18

- 19  
20 30 • In Australian children socioeconomic status is inversely associated with dietary sodium  
21  
22 31 intake.  
23  
24  
25 32 • Children of low socioeconomic background consumed more sodium from convenience  
26  
27 33 style foods including pies/sausage rolls; savoury sauces, fried prepared potato; processed  
28  
29 34 meat and potato crisps.  
30  
31  
32

33 35 **Strengths and limitations of this study**  
34

- 35  
36 36 • These results are based on a large nationally representative sample of Australian children  
37  
38 37 and adolescents.  
39  
40  
41 38 • Sodium intake was determined via a 24-hr dietary recall and therefore does not capture the  
42  
43 39 amount of sodium derived from salt used at the table or during cooking.  
44  
45

46  
47 40 The socioeconomic disparity of sodium intake reported in this study is attributable to  
48  
49 41 differences in sodium intake from food sources only. Further research is required to  
50  
51 42 understand how SES impacts on raising sodium intake.  
52  
53  
54  
55  
56  
57  
58  
59  
60

## 43 INTRODUCTION

44 As in adults,<sup>(1)</sup> dietary sodium intake is positively associated with blood pressure in  
45 children.<sup>(2, 3)</sup> Comparable to other developed nations,<sup>(4)</sup> dietary sodium intake of Australian  
46 children is high and exceeds dietary recommendations.<sup>(5, 6)</sup> Given blood pressure follows a  
47 tracking pattern over the life course,<sup>(7, 8)</sup> it is likely that high sodium consumption during  
48 childhood increases future risk of adult hypertension and subsequent cardiovascular disease  
49 (CVD). Increased CVD risk is also observed with low SES,<sup>(9, 10)</sup> potentially due in part to  
50 differences in dietary intakes. Furthermore, prolonged inequalities of SES across the life  
51 course are likely to accumulate to overall greater CVD risk,<sup>(11, 12)</sup> A number of studies in  
52 adults<sup>(13-15)</sup> and in children and adolescents<sup>(16-20)</sup> have identified SES as a determinant of diet  
53 quality. For instance, evidence from cross-sectional studies in children and adolescents have  
54 reported a positive association between SES and fruit and vegetable intake<sup>(17, 18, 21)</sup> and  
55 conversely, lower levels of SES have been associated with poor dietary outcomes, including  
56 greater intake of high fat foods,<sup>(20)</sup> fast foods and soft drinks.<sup>(19)</sup> Studies examining the  
57 association between SES and sodium intake are scarce and inconsistent, one study in British  
58 adults found low SES was associated with higher intakes of sodium,<sup>(22)</sup> whereas in US adults  
59 there was no association between SES and sodium intake.<sup>(23)</sup> The aim of this study was to  
60 examine the association between SES and dietary sodium intake and the food sources of  
61 sodium in a nationally representative sample of Australian children aged 2-16 years.

## 63 METHODS

### 64 Study design

1  
2  
3 65 The 2007 Australian Children's Nutrition and Physical Activity Survey (CNPAS) was a  
4  
5 66 cross-sectional survey designed to collect demographic, dietary, anthropometric and physical  
6  
7 67 activity data from a nationally representative sample of children aged 2-16 years. The full  
8  
9 68 details of the sampling methodology can be found elsewhere.<sup>(24)</sup> Briefly, participants were  
10  
11 69 recruited using a multistage quota sampling framework. The initial target quota was 1000  
12  
13 70 participants for each of the following age groups; 2-3, 4-8, 9-13 and 14-16 years (50% boys  
14  
15 71 and 50% girls), to which a 400 booster sample was later provided by the state of South  
16  
17 72 Australia. The primary sampling unit was postcode and clusters of postcodes were randomly  
18  
19 73 selected as stratified by state/territory and by capital city statistical division or rest of  
20  
21 74 state/territory. Randomly selected clusters of postcodes ensured an equal number of  
22  
23 75 participants in each age group, from each of the metro and non-metro areas within each state.  
24  
25 76 Within selected postcodes Random Digit Dialling (RDD) was used to invite eligible  
26  
27 77 households, i.e. those with children aged 2-16 years, to participate in the study. Only one  
28  
29 78 child from each household could participate in the study. The response rate of eligible  
30  
31 79 children was 40%. Due to the non-proportionate nature of the sampling framework each  
32  
33 80 participant was assigned a population weighting which weighted for age, gender and region.  
34  
35 81 The study was approved by the National Health and Medical Research Council registered  
36  
37 82 Ethics Committees of Commonwealth Scientific and Industrial Research Organisation and  
38  
39 83 the University of South Australia. All participants, or where the child was aged <14 years the  
40  
41 84 primary carer, provided written consent.<sup>(24)</sup>  
42  
43  
44  
45  
46  
47  
48  
49  
50

## 51 **Assessments**

52  
53  
54 87 Demographic and food intake data was collected during a face to face computer assisted  
55  
56 88 personal interview (CAPI) completed during February and August 2007. A three-pass 24 h  
57  
58  
59  
60

1  
2  
3 89 dietary recall was used to determine all food and beverages consumed from midnight to  
4  
5 90 midnight on the day prior to the interview.<sup>(24)</sup> The three pass method includes the following  
6  
7 91 stages i) provide a quick list of all foods and beverages ii) a series of probe questions relevant  
8  
9  
10 92 to each quick list item to gather more detailed information on time and place of consumption,  
11  
12 93 any additions to the food item, portion size and brand name iii) finally, a recall review to  
13  
14 94 validate information and make any necessary adjustments. Portion sizes were estimated  
15  
16 95 using a validated food model booklet and standard household measures. To minimise error  
17  
18 96 after data collection all interviews were reviewed by study dietitians to assess for unrealistic  
19  
20  
21 97 portion sizes, inadequate detail and typing errors. The primary carer of participants aged 9  
22  
23 98 years and under provided information on dietary intake.<sup>(24)</sup>  
24  
25

26 99

27  
28  
29 100 Sodium intake was calculated using the Australian nutrient composition database  
30  
31 101 AUSNUT2007, specifically developed by the Food Standards Australia and New Zealand for  
32  
33 102 the CNPAS.<sup>(25)</sup> A description of the food coding system using in this database has previously  
34  
35 103 been described.<sup>(26)</sup> Daily sodium (mg) intake was converted to the salt equivalent (g) using  
36  
37 104 the conversion 1 gram of sodium chloride (salt) = 390 mg sodium. Reported salt intake did  
38  
39 105 not include salt added at the table or during cooking.  
40  
41  
42

43 106

44  
45  
46 107 *Indicator of socioeconomic status*  
47

48  
49 108 Consistent with other dietary studies in children and adolescents we have used level of  
50  
51 109 education attained by the primary carer and household income as markers of SES.<sup>(27,28)</sup> The  
52  
53 110 highest level of education attained by the primary carer was used to define SES. Based on  
54  
55  
56 111 this participants were grouped into one of three categories of SES; i) high: includes those  
57

1  
2  
3 112 with a university/tertiary qualification ii) mid: includes those with an advanced diploma,  
4  
5 113 diploma or certificate III/IV or trade certificate iii) low: includes those with some or no level  
6  
7 114 of high school education. Parental income was used as a secondary indicator of SES.  
8  
9 115 Reported parental income before tax was grouped into four categories i) AUD\$ 0 to \$31 999  
10  
11 116 ii) \$31 200 to \$51 999 iii) \$52 000 to \$103 999 iv)  $\geq$  \$104 000. Body weight and height were  
12  
13 117 measured using standardised protocols.<sup>(29)</sup> BMI was calculated as body weight (kg) divided  
14  
15 118 by the square of body height (m<sup>2</sup>). Participants were grouped into weight categories (very  
16  
17 119 underweight, underweight, healthy weight, overweight, obese) using the International  
18  
19 120 Obesity Task Force BMI reference cut offs for children.<sup>(30,31)</sup>  
20  
21  
22  
23  
24  
25  
26

## 27 122 **Statistical analysis**

28  
29  
30 123 Statistical analyses were completed using STATA/SE 11 (StataCorp, College Station, Texas  
31  
32 124 USA) and PASW Statistics 17.0 (PASW Inc, Chicago, IL, USA). A *P* value of <0.05 was  
33  
34 125 considered significant. All analyses accounted for the complex survey design using the  
35  
36 126 STATA svy command, specifying strata variable (region), cluster variable (post code) and  
37  
38 127 population weighting (age, gender, region). Descriptive statistics are presented as mean (SD)  
39  
40 128 or n (% weighted). Pearson correlation coefficient was used to assess the association  
41  
42 129 between sodium intake, energy intake and BMI. To assess the association between SES, as  
43  
44 130 defined by primary carer education level, and sodium intake, multiple regression analysis was  
45  
46 131 used with adjustment for age, gender, energy intake and BMI. To further control for the  
47  
48 132 effects of age, the analysis was repeated stratified by age group (i.e. 2-3; 4-8; 9-13; 14-16  
49  
50 133 years). These age categories are consistent with those used in Australian dietary guidelines  
51  
52 134 <sup>(6)</sup>. As income level is sometimes used as a marker of SES <sup>(13)</sup> the association between  
53  
54  
55  
56  
57  
58  
59  
60

1  
2  
3 135 parental income and sodium intake was also examined, with adjustment for age, gender,  
4  
5 136 energy intake and BMI. The regression coefficient ( $\beta$ ) with 95% CI, corresponding *P* values  
6  
7 137 and the coefficient of determination ( $R^2$ ) are presented. In a previous analysis<sup>(26)</sup> which  
8  
9 138 included the same study population we used the population proportion formula<sup>(32)</sup> to calculate  
10  
11 139 the contribution of sodium from sub-major food group categories, as defined in the CNPAS  
12  
13 140 food group coding system.<sup>(24)</sup> The population proportion formula<sup>(32)</sup> is outlined below:

14 141 **% of sodium from food group** = [sum of sodium from food group (mg) / total sum of  
15  
16  
17 142 sodium from all foods (mg)] X 100

18  
19  
20  
21  
22  
23 143 For the present study, we have utilised this list which identifies the main sources of dietary  
24  
25 144 sodium, to determine if sodium intake from food group differs between low and high SES  
26  
27 145 categories, based on primary carer education level. To do this, we calculated the mean  
28  
29 146 sodium intake from each sub-major food group by SES category, and compared the mean  
30  
31 147 sodium of low to high SES, using an independent T-test.  
32  
33  
34

35 148

## 36 37 38 149 **RESULTS**

39  
40  
41 150 Basic characteristics of the 4 487 participants are listed in **Table 1**. As defined by parental  
42  
43 151 education status, the proportion of children from low, mid and high SES background was  
44  
45 152 relatively evenly distributed. Over two thirds of children fell within the two highest income  
46  
47 153 bands. There was a significant positive correlation between sodium intake and energy intake  
48  
49 154 ( $r = 0.69$ ,  $P < 0.001$ ) and sodium intake and BMI ( $r = 0.22$ ,  $P < 0.001$ ). Average daily sodium  
50  
51 155 intake differed by SES (**Figure 1**,  $P < 0.01$ ). Regression analysis indicated that low SES was  
52  
53 156 associated with a 195 mg/d (salt 0.5 g/d) greater intake of sodium. The association between  
54  
55  
56  
57  
58  
59  
60



1  
2  
3 157 SES and sodium intake remained after adjustment for age, gender, energy intake and BMI  
4  
5 158 (**Table 2**). When stratified by age group the association between sodium intake and SES  
6  
7 159 remained significant between the ages of 4-13 years (**Table 2**), however there was no  
8  
9  
10 160 association between sodium intake and SES in 2-3 year olds or in 14-16 year olds (data not  
11  
12 161 shown). There was no association between sodium intake and parental income (data not  
13  
14 162 shown), however, only 28% of children fell within the two lowest income bands (**Table 1**)  
15  
16  
17 163  
18  
19  
20 164 **Table 3** lists those sub-major food groups which contributed >1% to the groups' total daily  
21  
22 165 sodium intake. Combined these 23 food groups accounted for 84.5% of total daily sodium  
23  
24 166 intake. Regular breads and bread rolls contributed the most sodium. Moderate sources of  
25  
26 167 sodium, contributing more than 4% of total sodium intake, included mixed dishes where  
27  
28 168 cereal is the major ingredient (e.g. pizza, hamburger, sandwich, savoury rice and noodle  
29  
30 169 based dishes), processed meat, gravies and savoury sauces, pastries, cheese, and breakfast  
31  
32 170 cereals and bars. Compared to children of high SES, children of low SES had a significantly  
33  
34 171 greater intake of sodium from processed meat, gravies and savoury sauce, pastries, breakfast  
35  
36 172 cereals and bars, potatoes and potato snacks (e.g. potato crisps). The percentage difference in  
37  
38 173 sodium intake in each of these categories was 46%, 31%, 24%, 16%, 39% and 46%,  
39  
40 174 respectively (**Table 3**). Conversely, children of high SES background had a significantly  
41  
42 175 greater intake of sodium from the food group containing cakes, buns, muffins, scones, cake-  
43  
44 176 type desserts; and the food group described as batter-based products (e.g. pancakes, picklets).  
45  
46 177 The percentage difference in sodium intake in each of these categories was 16% and 32%,  
47  
48 178 respectively (**Table 3**).  
49  
50  
51  
52  
53  
54 179  
55  
56  
57  
58  
59  
60

1  
2  
3 180 **DISCUSSION**  
4  
5

6 181 In a nationally representative sample of Australian children aged 2-16 years, we found  
7  
8 182 children of low SES background consumed 9% more dietary sodium, from food sources, than  
9  
10 183 those of high SES background. The inverse association between sodium intake and SES was  
11  
12 184 primarily driven by the association in children aged 4-13 years, particularly after adjustment  
13  
14 185 for the important covariates age, gender, energy intake and BMI. In adult studies, low SES  
15  
16 186 has been associated with more frequent consumption of high salt foods, such as soup, sauces,  
17  
18 187 ready to eat meals, savoury seasonings, sausages and potato.<sup>(33, 34)</sup> Given parental control  
19  
20 188 over children's food choices during these years, it is likely that SES disparities in adult food  
21  
22 189 choices relating to high salt foods may filter down into children's eating practices. We found  
23  
24 190 no association between SES and sodium intake in 2-3 and 14-16 year olds. Although some  
25  
26 191 evidence indicates SES disparities in dietary patterns may be present during infancy,<sup>(35)</sup> it is  
27  
28 192 possible such early differences are not seen in dietary patterns with the restricted range of  
29  
30 193 food types. In the case of adolescents, as autonomy over food choices increases, other  
31  
32 194 factors, such as peer-influence, taste and eating away from the home<sup>(36)</sup> may become more  
33  
34 195 prominent determinants of dietary intake.  
35  
36  
37  
38  
39  
40  
41  
42

43 197 Using US National Health and Nutrition Examination Survey (NHANES) data, Mazur et  
44  
45 198 al.<sup>(37)</sup> explored the association of SES, as indicated by head of household education status and  
46  
47 199 household income, on sodium intake in Hispanic children aged 4-16 years. Interestingly, in  
48  
49 200 this study lower levels of education were associated with lower sodium intake<sup>(37)</sup>. This is  
50  
51 201 contrary to our own findings as well as past studies, which generally link lower SES to  
52  
53 202 overall poorer dietary outcomes.<sup>(13)</sup> We found no association between sodium intake and  
54  
55 203 level of income, however low income bands were underrepresented. This is in contrast to the  
56  
57  
58  
59  
60

1  
2  
3 204 findings in Hispanic children, where low household income was associated with a greater  
4  
5 205 intake of dietary sodium.<sup>(37)</sup> In a New Zealand food survey, low cost ‘home brand’ labelled  
6  
7 206 food products were found to contain greater quantities of sodium than the more expensive  
8  
9 207 branded food products.<sup>(38)</sup> The impact of income on sodium intake in Australian children  
10  
11 208 remains unclear and further research is required.  
12  
13

14  
15 209

16  
17  
18 210 Previous studies in children have reported socioeconomic differences in the consumption of  
19  
20 211 certain food groups.<sup>(39,40)</sup> For example, in European children of low SES background, greater  
21  
22 212 intake of starchy foods, meat products, savoury snacks such as hamburgers, sugar and  
23  
24 213 confectionary, pizza, desserts and soft drinks have been reported.<sup>(39,40)</sup> In the present study  
25  
26 214 those food groups which were found to contribute more sodium to the diets of low SES  
27  
28 215 children tended to include convenience style foods (i.e. pies/sausage rolls; savoury sauce and  
29  
30 216 casserole base sauces; fried prepared potato; processed meat; potato snacks). Comparably,  
31  
32 217 children of high SES background consumed greater amounts of sodium from cake and baked  
33  
34 218 type products. However, a significant amount of sodium in baked products can be in sodium  
35  
36 219 bicarbonate rather than in the form of sodium chloride. Sodium bicarbonate, unlike sodium  
37  
38 220 chloride, has not been directly associated with adverse blood pressure outcomes.<sup>(41)</sup>  
39  
40  
41  
42

43 221

44  
45  
46 222 With reference to sodium intake data by age group<sup>(5)</sup> and comparison to the recommended  
47  
48 223 daily Upper Limit of sodium<sup>(6)</sup> it is evident that Australian children of all ages across all SES  
49  
50 224 backgrounds are consuming too much dietary sodium. However, for the first time our  
51  
52 225 findings indicate that socioeconomic disparities exist in sodium intake in Australian children  
53  
54 226 aged 9-13 years. To reduce sodium intake in children a comprehensive approach is required,  
55  
56  
57  
58  
59  
60

1  
2  
3 227 firstly targeting food policy, to encourage product reformulation of lower sodium food  
4  
5 228 products across all price ranges within the food supply. Secondly, consumer education and  
6  
7 229 awareness campaigns, that encourage food choices which are based on fresh products with  
8  
9  
10 230 minimal processing; this may require strategies that equip parents with enhanced food  
11  
12 231 preparation skills and knowledge of the 'hidden' salt added to many commonly eaten  
13  
14 232 processed foods. Furthermore, it is apparent that these strategies need to reach lower SES  
15  
16 233 groups.  
17  
18  
19 234

20  
21  
22 235 The major strengths of this study include the use of a large nationally-representative sample  
23  
24 236 of Australian children, with comprehensive and standardised collection of dietary intake.  
25  
26 237 Limitations of the study include the use of a 24-hr dietary recall to assess sodium intake.  
27  
28  
29 238 Firstly, this method fails to capture the amount of salt coming from salt added at the table and  
30  
31 239 during cooking and therefore is likely to underestimate the true value of salt intake.<sup>(42)</sup> The  
32  
33 240 majority (77%) of dietary sodium consumed is from salt added to processed foods, whilst a  
34  
35 241 smaller amount (11%) has been found to be derived from salt added at the table and during  
36  
37 242 cooking.<sup>(43)</sup> In the present study, the higher intake of sodium reported in children from low  
38  
39 243 SES background is attributable to differences in sodium intake from food sources only. In a  
40  
41 244 previous analysis of these data, we found that children from low SES background (33%) were  
42  
43 245 more likely to report adding salt at the table than children from high SES (25%).<sup>(26)</sup> Thus, it  
44  
45 246 is likely that children of low SES background are consuming greater amounts of total daily  
46  
47 247 sodium than reported in the present analysis. Secondly, assessment of sodium intake is  
48  
49 248 limited by the quality of food composition databases, which may not capture the variation in  
50  
51 249 sodium content of different brand products within each food group.<sup>(42, 44)</sup>  
52  
53  
54  
55  
56  
57 250

1  
2  
3 251 In summary, the findings of higher salt intakes from food sources in children of lower SES  
4  
5 252 background, within in a nationally representative sample, provides focus for concern  
6  
7 253 regarding salt related disease across the life course. This socioeconomic patterning of salt  
8  
9 254 intake may in turn influence the SES disparity seen in hypertension and cardiovascular risk in  
10  
11 255 adulthood. To reduce socioeconomic inequalities in health, interventions need to begin early  
12  
13 256 in life and should include product reformulation of lower sodium food products across all  
14  
15 257 price ranges, as well as consumer education and awareness campaigns which reach low SES  
16  
17  
18 258 groups.  
19  
20  
21  
22  
23

24  
25 260 **Contributorship statement:** The author's responsibilities were as follows – CAG, KJC, LJR  
26  
27 261 and CAN designed research; CAG performed statistical analysis and wrote the manuscript  
28  
29 262 and is guarantor of the paper; LJR, KJC and CAN helped with data interpretation, revision of  
30  
31 263 manuscript and provided significant consultation. All authors have read and approved the  
32  
33 264 final manuscript.  
34  
35

36 265 **Funding Statement:** This work was supported by a post graduate scholarship from the Heart  
37  
38 266 Foundation of Australia PP 08M 4074.  
39  
40  
41  
42  
43  
44  
45 268

**Table 1.** Basic characteristics of Australian children and adolescents aged 2-16 years (n 487)

| Characteristic                               | n or mean | % or SD |
|----------------------------------------------|-----------|---------|
| Male (n %)                                   | 2 249     | 51      |
| Age (years) (mean SD)                        | 9.1       | 4.3     |
| Age group (n %)                              |           |         |
| 2-3 years                                    | 1071      | 12      |
| 4-8 years                                    | 1216      | 34      |
| 9-13 years                                   | 1110      | 33      |
| 14-16 years                                  | 1090      | 21      |
| Socioeconomic status (n %)*                  |           |         |
| Low SES                                      | 1414      | 30      |
| Mid SES                                      | 1583      | 36      |
| High SES                                     | 1490      | 34      |
| Parental income (n %) <sup>†</sup>           |           |         |
| \$0 to 31 999                                | 500       | 11      |
| \$32 000 to 51 999                           | 732       | 17      |
| \$52 000 to 103 999                          | 1850      | 42      |
| \$≥104 000                                   | 1169      | 30      |
| Weight status (n %) <sup>‡</sup>             |           |         |
| Underweight                                  | 212       | 5       |
| Healthy weight                               | 3267      | 72      |
| Overweight                                   | 761       | 17      |
| Obese                                        | 247       | 6       |
| Energy (kJ/d) (mean SD)                      | 8392      | 3156    |
| Sodium (mg/d) (mean SD)                      | 2473      | 1243    |
| Salt equivalent (g/d) (mean SD) <sup>§</sup> | 6.3       | 3.1     |

‡ SES as defined by the highest level of education attained by the primary carer

<sup>†</sup>Participants with missing information for parental income (n=236) excluded

‡Weight classification based on the International Obesity Task Force BMI reference cut offs

(30, 31)

§Salt equivalents (i.e. sodium chloride: 1 g = 390 mg sodium)

For peer review only

1  
2  
3 **Figure 1.** Mean sodium intake (mg/d) by socioeconomic group (n = 4487)<sup>†‡</sup>  
4  
5

6 **[JPEG IMAGE ATTACHED]**  
7  
8  
9  
10  
11  
12  
13  
14  
15  
16  
17

18 \* Significantly different from high SES ( $P < 0.001$ )  
19

20  
21 \*\* Significantly different from high SES ( $P < 0.05$ )  
22

23  
24 †SES as defined by the highest level of education attained by the primary carer  
25  
26  
27  
28  
29  
30  
31  
32  
33  
34  
35  
36  
37  
38  
39  
40  
41  
42  
43  
44  
45  
46  
47  
48  
49  
50  
51  
52  
53  
54  
55  
56  
57  
58  
59  
60



**Table 2.** Association between socioeconomic status (SES) and dietary sodium intake (390 mg/d) (1 g/d salt) in Australian children and adolescents aged 2-16 years (n 4 487) <sup>¶</sup> †

| Variable                    | Total Sample (n=4 487) |         | Age group <sup>‡</sup> |         |                       |         |
|-----------------------------|------------------------|---------|------------------------|---------|-----------------------|---------|
|                             |                        |         | 4-8 years (n=1 216)    |         | 9-13 years (n=1 110)  |         |
|                             | $\beta$ (95% CI)       | P Value | $\beta$ (95% CI)       | P Value | $\beta$ (95% CI)      | P Value |
| <b>Unadjusted</b>           |                        |         |                        |         |                       |         |
| High SES (reference)        |                        |         |                        |         |                       |         |
| Mid SES                     | 0.3 (0.03, 0.5)        | 0.03    | 0.2 (-0.1, 0.6)        | 0.17    | 0.2 (-0.2, 0.6)       | 0.319   |
| Low SES                     | 0.5 (0.3, 0.8)         | <0.001  | 0.5 (0.1, 1.0)         | 0.02    | 0.5 (-0.02, 1.0)      | 0.06    |
|                             | R <sup>2</sup> =0.004  | <0.01   | R <sup>2</sup> =0.008  | 0.05    | R <sup>2</sup> =0.004 | 0.16    |
| <b>Adjusted<sup>§</sup></b> |                        |         |                        |         |                       |         |

1  
2  
3  
4  
5  
6  
7  
8  
9  
10  
11  
12  
13  
14  
15  
16  
17  
18  
19  
20  
21  
22  
23  
24  
25  
26  
27  
28  
29  
30  
31  
32  
33  
34  
35  
36  
37  
38  
39  
40  
41  
42  
43  
44  
45  
46  
47  
48  
49

|                      |                      |        |                      |        |                      |        |
|----------------------|----------------------|--------|----------------------|--------|----------------------|--------|
| High SES (reference) |                      |        |                      |        |                      |        |
| Mid SES              | 0.2 (0.01, 0.4)      | 0.04   | 0.2 (-0.1, 0.4)      | 0.13   | 0.2 (-0.2, 0.6)      | 0.23   |
| Low SES              | 0.5 (0.2, 0.7)       | <0.001 | 0.6 (0.2, 0.9)       | 0.001  | 0.6 (0.1, 1.0)       | 0.01   |
|                      | R <sup>2</sup> =0.49 | <0.001 | R <sup>2</sup> =0.37 | <0.001 | R <sup>2</sup> =0.36 | <0.001 |

---

¶ Dependent variable is sodium intake in units of 390 mg/d (salt equivalent 1 g/d) and independent variable is SES entered as an indicator variable: high SES is the reference category

†SES as defined by the highest level of education attained by the primary carer

‡No association between salt intake and SES in age groups 2-3 years and 14-16 years (models not shown)

§Adjusted for gender, age, energy intake and BMI

**Table 3.** Dietary sources of sodium intake listed by their contribution to intake for the group and mean daily sodium intake by food group, by socioeconomic group¶

| Food group                                           | Total sample<br>(n 4487)                       | SES Group†               |                          |                          | P value‡    |
|------------------------------------------------------|------------------------------------------------|--------------------------|--------------------------|--------------------------|-------------|
|                                                      |                                                | Low (n 1414)             | Mid (n 1583)             | High (n 1490)            |             |
|                                                      | % contribution to total<br>daily sodium intake | Mean sodium<br>(SD) mg/d | Mean sodium<br>(SD) mg/d | Mean sodium<br>(SD) mg/d |             |
| Regular breads and bread rolls                       | 13.4                                           | 340 (315)                | 330 (300)                | 324 (317)                | 0.26        |
| Mixed dishes where cereal is the<br>major ingredient | 8.7                                            | 214 (514)                | 256 (616)                | 172 (445)                | 0.07        |
| <b>Processed meat§</b>                               | <b>7.6</b>                                     | <b>216 (464)</b>         | <b>180 (403)</b>         | <b>168 (368)</b>         | <b>0.02</b> |
| <b>Gravies and savoury sauces□</b>                   | <b>6.5</b>                                     | <b>182 (385)</b>         | <b>166 (395)</b>         | <b>139 (354)</b>         | <b>0.01</b> |
| <b>Pastries¶</b>                                     | <b>4.9</b>                                     | <b>135 (400)</b>         | <b>120 (352)</b>         | <b>109 (345)</b>         | <b>0.03</b> |

1  
2  
3  
4  
5  
6  
7  
8  
9  
10  
11  
12  
13  
14  
15  
16  
17  
18  
19  
20  
21  
22  
23  
24  
25  
26  
27  
28  
29  
30  
31  
32  
33  
34  
35  
36  
37  
38  
39  
40  
41  
42  
43  
44  
45  
46  
47  
48  
49

|                                                                 |            |                  |                  |                 |             |
|-----------------------------------------------------------------|------------|------------------|------------------|-----------------|-------------|
| Cheese                                                          | 4.6        | 114 (209)        | 110 (190)        | 116 (186)       | 0.80        |
| <b>Breakfast cereals and bars</b>                               | <b>4.2</b> | <b>113 (176)</b> | <b>101 (166)</b> | <b>97 (161)</b> | <b>0.03</b> |
| Dairy milk                                                      | 3.9        | 95 (106)         | 94 (103)         | 100 (98)        | 0.25        |
| Herbs, spices, seasonings and<br>stock cubes                    | 3.7        | 114 (482)        | 75 (246)         | 90 (301)        | 0.31        |
| Sausages, frankfurts and saveloys                               | 2.9        | 79 (259)         | 74 (136)         | 61 (201)        | 0.07        |
| Mixed dishes where poultry/game<br>is the major component       | 2.6        | 79 (268)         | 59 (194)         | 60 (238)        | 0.09        |
| Soup (prepared, ready to eat)                                   | 2.6        | 51 (288)         | 74 (379)         | 65 (282)        | 0.25        |
| English-style muffins, flat breads,<br>and savoury sweet breads | 2.4        | 55 (158)         | 58 (180)         | 67 (181)        | 0.17        |
| <b>Cakes, buns, muffins, scones,</b>                            | <b>2.3</b> | <b>54 (153)</b>  | <b>52 (144)</b>  | <b>68 (176)</b> | <b>0.02</b> |

---

| <b>cake-type desserts</b>                                       |            |                 |                 |                 |             |
|-----------------------------------------------------------------|------------|-----------------|-----------------|-----------------|-------------|
| Savoury biscuits                                                | 2.2        | 49 (136)        | 57 (147)        | 57 (152)        | 0.34        |
| Yeast, yeast, vegetable and meat<br>extracts                    | 2.0        | 47 (117)        | 55 (143)        | 45 (108)        | 0.70        |
| <b>Potatoes</b> ¶ ¶ ¶                                           | <b>1.9</b> | <b>53 (128)</b> | <b>51 (127)</b> | <b>38 (106)</b> | <b>0.01</b> |
| <b>Batter-based products</b> ††                                 | <b>1.7</b> | <b>38 (161)</b> | <b>37 (150)</b> | <b>50 (180)</b> | <b>0.05</b> |
| <b>Potato snacks</b>                                            | <b>1.7</b> | <b>51 (149)</b> | <b>40 (121)</b> | <b>35 (125)</b> | <b>0.03</b> |
| Pasta and pasta products                                        | 1.4        | 35 (142)        | 32 (130)        | 35 (138)        | 0.89        |
| Sweet biscuits                                                  | 1.2        | 29 (64)         | 33 (72)         | 27 (62)         | 0.61        |
| Mixed dishes where beef, veal or<br>lamb is the major component | 1.1        | 32 (175)        | 21 (116)        | 28 (56)         | 0.53        |
| Mature legumes and pulse                                        | 1.0        | 21 (149)        | 21 (137)        | 35 (258)        | 0.12        |

---

1  
2  
3  
4  
5 products and dishes  
6  
7

---

8 ¶ Includes those sub-major food group categories that contribute >1.0% of sodium to daily intake ambiguous  
9

10  
11 †SES as defined by the highest level of education attained by the primary carer  
12

13  
14 ‡Means are compared between low and high SES groups using independent T-test  
15

16  
17 §includes ham, bacon and processed delicatessen meat  
18

19  
20 □includes pasta sauces and casserole bases  
21

22  
23 ¶includes pies and sausage rolls  
24

25  
26 ¶ ¶ includes potato gems and wedges  
27

28  
29 ††includes pancakes and pikelets  
30  
31  
32  
33  
34  
35  
36  
37  
38  
39  
40  
41  
42  
43  
44  
45  
46  
47  
48  
49

1  
2  
3  
4  
5  
6  
7  
8  
9  
10  
11  
12  
13  
14  
15  
16  
17  
18  
19  
20  
21  
22  
23  
24  
25  
26  
27  
28  
29  
30  
31  
32  
33  
34  
35  
36  
37  
38  
39  
40  
41  
42  
43  
44  
45  
46  
47  
48  
49  
50  
51  
52  
53  
54  
55  
56  
57  
58  
59  
60

For peer review only

**REFERENCES**

1. Dickinson BD, Havas S. Reducing the population burden of cardiovascular disease by reducing sodium intake. *Arch Intern Med* 2007;**167**:1460-68.
2. He FJ, MacGregor GA. Importance of Salt in Determining Blood Pressure in Children Meta-Analysis of Controlled Trials. *Hypertension* 2006;**48**:861-69.
3. He FJ, Marrero NM, MacGregor GA. Salt and blood pressure in children and adolescents. *J Hum Hyperten* 2008;**22**:4-11.
4. Brown IJ, Tzoulaki I, Candeias V, et al. Salt intakes around the world: implications for public health. *Int J Epidemiol* 2009;**38**:791-813.
5. Department of Health and Ageing, Australian Food and Grocery Council, Department of Agriculture Fisheries and Forestry. 2007 Australian National Children's Nutrition and Physical Activity Survey - Main Findings. Canberra: Commonwealth of Australia, 2008. Available from:  
[http://www.health.gov.au/internet/main/publishing.nsf/content/66596E8FC68FD1A3CA2574D50027DB86/\\$File/childrens-nut-phys-survey.pdf](http://www.health.gov.au/internet/main/publishing.nsf/content/66596E8FC68FD1A3CA2574D50027DB86/$File/childrens-nut-phys-survey.pdf).
6. National Health and Medical Research Council. Nutrient reference values for Australia and New Zealand. Canberra: Australian Government. Department of Health and Ageing, 2006. Available from:  
[http://www.nhmrc.gov.au/files\\_nhmrc/publications/attachments/n35.pdf](http://www.nhmrc.gov.au/files_nhmrc/publications/attachments/n35.pdf).
7. Chen X, Wang Y. Tracking of blood pressure from childhood to adulthood A systematic review and meta-regression analysis. *Circulation* 2008;**117**:3171-80.
8. Toschke AM, Kohl L, Mansmann U, et al. Meta-analysis of blood pressure tracking from childhood to adulthood and implications for the design of intervention trials. *Acta Paediatrica* 2010;**99**:24-29.



- 1  
2  
3 9. Kaplan GA, Keil JE. Socioeconomic factors and cardiovascular disease: a review of the  
4  
5 literature. *Circulation* 1993;**88**:1973-98.  
6  
7  
8 10. Rosengren A, Subramanian SV, Islam S, et al. Education and risk for acute myocardial  
9  
10 infarction in 52 high, middle and low-income countries: INTERHEART case-control  
11  
12 study. *Heart* 2009;**95**:2014-22.  
13  
14 11. Loucks EB, Lynch JW, Pilote L, et al. Life-course socioeconomic position and incidence  
15  
16 of coronary heart disease: the Framingham Offspring Study. *Am J Epidemiol*  
17  
18 2009;**169**:829-36.  
19  
20  
21 12. Pollitt RA, Rose KM, Kaufman JS. Evaluating the evidence for models of life course  
22  
23 socioeconomic factors and cardiovascular outcomes: a systematic review. *BMC*  
24  
25 *Public Health* 2005;**5**:7.  
26  
27  
28 13. Darmon N, Drewnowski A. Does social class predict diet quality? *Am J Clin Nutr*  
29  
30 2008;**87**:1107-17.  
31  
32 14. Giskes K, Turrell G, Patterson C, et al. Socio-economic differences in fruit and vegetable  
33  
34 consumption among Australian adolescents and adults. *Public Health Nutr*  
35  
36 2002;**5**:663-69.  
37  
38  
39 15. Hulshof KFAM, Brussaard JH, Kruijzinga AG, et al. Socio-economic status, dietary intake  
40  
41 and 10 y trends: the Dutch National Food Consumption Survey. *Eur J Clin Nutr*  
42  
43 2003;**57**:128-37.  
44  
45  
46 16. Ambrosini GL, Oddy WH, Robinson M, et al. Adolescent dietary patterns are associated  
47  
48 with lifestyle and family psycho-social factors. *Public Health Nutr* 2009;**12**:1807-15.  
49  
50  
51 17. Haapalahti M, Mykkanen H, Tikkanen S, et al. Meal patterns and food use in 10- to 11-  
52  
53 year old Finnish children. *Public Health Nutr* 2002;**6**:365-70.  
54  
55  
56 18. Neumark-Sztainer D, Wall M, Perry C, et al. Correlates of fruit and vegetable intake  
57  
58 among adolescents Findings from Project EAT. *Prev Med* 2003;**37**:198-208.  
59  
60

- 1  
2  
3 19. Utter J, Denny S, Crengle S, et al. Socio-economic differences in eating-related attitudes,  
4 behaviours and environments of adolescents. *Public Health Nutr* 2010;**14**:629-34.  
5  
6  
7 20. Wardle J, Jarvis MJ, Steggle N, et al. Socioeconomic disparities in cancer-risk  
8 behaviours in adolescence: baseline results from the Health and Behaviour in  
9 Teenagers Study (HABITS). *Prev Med* 2003;**36**:721-30.  
10  
11  
12 21. Dubois L, Farmer A, Girard M, et al. Demographic and socio-economic factors related to  
13 food intake and adherence to nutritional recommendations in a cohort of pre-school  
14 children. *Public Health Nutr* 2011;**14**:1096-104.  
15  
16  
17 22. Bates CJ, Prentice A, Cole TJ, et al. Micronutrients: highlights and research challenges  
18 from the 1994–5 National Diet and Nutrition Survey of people aged 65 years and  
19 over. *Brit J Nutr* 1999;**82**:7-15.  
20  
21  
22 23. Gerber AM, James SA, Ammerman AS, et al. Socioeconomic status and electrolyte  
23 intake in black adults: the Pitt country Study. *Am J Public Health* 1991;**81**:1608-12.  
24  
25  
26 24. Department of Health and Ageing. User Guide 2007 Australian National Children's  
27 Nutrition and Physical Activity Survey. Canberra: 2010. Available from:  
28  
29  
30 <http://www.health.gov.au/internet/main/publishing.nsf/Content/AC3F256C715674D5>  
31 [CA2574D60000237D/\\$File/user-guide-v2.pdf](http://www.health.gov.au/internet/main/publishing.nsf/Content/AC3F256C715674D5).  
32  
33  
34 25. Food Standards Australian and New Zealand [Internet]. Canberra: Food Standards  
35 Australia and New Zealand; [cited 2009 Jan 23]. Available from:  
36  
37 <http://www.foodstandards.gov.au/consumerinformation/ausnut2007/>.  
38  
39  
40 26. Grimes CA, Campbell KJ, Riddell LJ, et al. Sources of sodium in Australian children's  
41 diets and the effect of the application of sodium targets to food products to reduce  
42 sodium intake. *Br J Nutr* 2011;**105**:468-77.  
43  
44  
45 27. Cameron AJ, Ball K, Pearson N, et al. Socioeconomic variation in diet and activity-  
46 related behaviours of Australian children and adolescents  
47  
48  
49  
50  
51  
52  
53  
54  
55  
56  
57  
58  
59  
60

- 1  
2  
3 aged 2–16 years. *Pediatr Obes* 2010;**7**:329-42.
- 4  
5 28. Golley RK, Hendrie GA, McNaughton SA. Scores on the Dietary Guideline Index for  
6  
7 Children and Adolescents Are Associated with Nutrient Intake and Socio-Economic  
8  
9 position but Not Adiposity. *J Nutr* 2011;**141**:1340-7.
- 10  
11 29. Marfell-Jones M, Olds T, Stewart A, et al. International standards for anthropometric  
12  
13 assessment. Potchefstroom, South Africa: International standards for anthropometric  
14  
15 assessment,, 2006. Available from:
- 16  
17 30. Cole TJ. Establishing a standard definition for child overweight and obesity worldwide:  
18  
19 international survey. *Br Med J* 2000;**320**:1-6.
- 20  
21 31. Cole TJ, Flegal KM, Nicholls D, et al. Body mass index cut offs to define thinness in  
22  
23 children and adolescents: international survey. *Brit Med J* 2007;**335**:194-7.
- 24  
25 32. Krebs-Smith SM, Kott PS, Guenther PM. Mean proportion and population proportion:  
26  
27 two answers to the same question? *J Am Diet Assoc* 1989;**89**:667-72.
- 28  
29 33. Purdy J, Armstrong G, McIlveen H. The influence of socio-economic status on salt  
30  
31 consumption in Northern Ireland. *International Journal of Consumer Studies*  
32  
33 2002;**26**:71-80.
- 34  
35 34. Van der Veen JE, Graaf CD, Van Dis SJ, et al. Determinants of salt use in cooked meals  
36  
37 in the Netherlands: attitudes and practices of food preparers. *Eur J Clin Nutr*  
38  
39 1999;**53**:388-94.
- 40  
41 35. Okubo H, Miyake Y, Sasaki S, et al. Dietary patterns in infancy and their associations  
42  
43 with maternal socio-economic and lifestyle factors among 758 Japanese mother–child  
44  
45 pairs: the Osaka Maternal and Child Health Study. *Matern Child Nutr*  
46  
47 2012;**8**:doi:10.1111/j.740-8709.2012.00403.x.
- 48  
49 36. Story M, Neumark-Sztainer D, French S. Individual and environmental influences on  
50  
51 adolescent eating behaviours. *J Am Diet Assoc* 2002;**102**:S40-S51.
- 52  
53  
54  
55  
56  
57  
58  
59  
60

- 1  
2  
3 37. Mazur RE, Marquis GS, Jensen HH. Diet and food insufficiency among Hispanic youths:  
4  
5 acculturation and socioeconomic factors in the third National Health and Nutrition  
6  
7 Examination Survey. *Am J Clin Nutr* 2003;**78**:1120-27.  
8  
9  
10 38. Monro D, Young L, Wilson J, et al. The sodium content of low cost and private label  
11  
12 foods; implications for public health. *Journal of the New Zealand Dietetic Association*  
13  
14 2004;**58**:4-10.  
15  
16 39. Lioret S, Dubuisson C, Dufour A, et al. Trends in food intake in French children from  
17  
18 1999 to 2007: results from the INCA (etude Individuelle Nationale des  
19  
20 Consommations Alimentaires) dietary surveys. *Brit J Nutr* 2010;**103**:585-601.  
21  
22  
23 40. Sausenthaler S, Standl M, Buyken A, et al. Regional and socio-economic differences in  
24  
25 food, nutrient and supplement intake in school-age children in Germany: results from  
26  
27 the GINIplus and the LISApplus studies. *Public Health Nutr* 2011;**10**:1724-35.  
28  
29  
30 41. McCarty MF. Should we restrict chloride rather than sodium? *Med Hypotheses*  
31  
32 2004;**63**:138-48.  
33  
34 42. Loria CM, Obarzanek E, Ernst ND. The Dietary Guidelines: Surveillance Issues and  
35  
36 Research Needs. Choose and Prepare Foods with Less Salt: Dietary Advice for All  
37  
38 Americans. *J Nutr* 2001;**131**:536S-51S.  
39  
40  
41 43. Mattes RD, Donnelly D. Relative contributions of dietary sodium sources. *J Am Coll*  
42  
43 *Nutr* 1991;**10**:383-93.  
44  
45 44. World Health Organization. Creating an enabling environment for population-based salt  
46  
47 reduction strategies. United Kingdom: World Health Organization, 2010. Available  
48  
49 from:  
50  
51  
52  
53  
54  
55  
56  
57  
58  
59  
60

1  
2  
3 **Is socioeconomic status associated with dietary sodium intake in Australian children? A**  
4 **cross-sectional study**  
5  
6  
7

8 Carley A. Grimes<sup>1</sup>, Karen J Campbell<sup>2</sup>, Lynn J Riddell<sup>3</sup>, Caryl A. Nowson<sup>4</sup>  
9  
10

11  
12  
13  
14 <sup>1</sup> Carley A. Grimes, Centre for Physical Activity and Nutrition Research, School of Exercise  
15 and Nutrition Sciences, Deakin University, 221 Burwood Highway, Burwood, Victoria 3125,  
16 Australia.  
17  
18  
19

20  
21  
22 <sup>2</sup> Karen J. Campbell, Centre for Physical Activity and Nutrition Research, School of Exercise  
23 and Nutrition Sciences, Deakin University, 221 Burwood Highway, Burwood, Victoria 3125,  
24 Australia.  
25  
26  
27

28  
29 <sup>3</sup> Lynn J Riddell, Centre for Physical Activity and Nutrition Research, School of Exercise and  
30 Nutrition Sciences, Deakin University, 221 Burwood Highway, Burwood, Victoria 3125,  
31 Australia.  
32  
33  
34

35  
36 <sup>4</sup> Caryl A. Nowson, Centre for Physical Activity and Nutrition Research, School of Exercise  
37 and Nutrition Sciences, Deakin University, 221 Burwood Highway, Burwood, Victoria 3125,  
38 Australia. Tel: 613 9251 7272. Fax: 613 9244 6017. E-mail: [nowson@deakin.edu.au](mailto:nowson@deakin.edu.au)  
39  
40  
41  
42  
43

44 **Corresponding author & Reprints:**  
45

46  
47 Carley A. Grimes, Centre for Physical Activity and Nutrition Research, School of Exercise  
48 and Nutrition Sciences, Deakin University, 221 Burwood Highway, Burwood, Victoria 3125,  
49 Australia. Tel: 613 9251 7272. Fax: 613 9244 6017. E-mail: [carley.grimes@deakin.edu.au](mailto:carley.grimes@deakin.edu.au)  
50  
51  
52  
53  
54

**Short title:**

Dietary sodium intake and socioeconomic status in Australian children

**Key words:**

Sodium, Dietary; Sodium Chloride; Socioeconomic Status; Child; Australia

**Word count:** 2651

**Declaration of competing interests:**

All authors have completed the Unified Competing Interest form at [www.icmje.org/coi\\_disclosure.pdf](http://www.icmje.org/coi_disclosure.pdf) (available on request from the corresponding author) and declare: Carley Grimes had financial support in the form of a post graduate scholarship from the Heart Foundation, Australia for the submitted work; and had no financial relationships with any organisations that might have an interest in the submitted work in the previous three years, no other relationships or activities that could appear to have influenced the submitted work. Karen Campbell had no support from any organisation for the submitted work; no other relationships or activities that could appear to have influenced the submitted work. Caryl Nowson has received research funds from Meat & Livestock Australia; National Health and Medical Research Council, Wicking Foundation, National Heart Foundation, Australia, Helen MacPerhson Smith Trust and Red Cross Blood Bank. These payments are unrelated to the submitted work. Lynn Riddell has received research funds from Meat & Livestock Australia. These payments are unrelated to the submitted work.

**Data sharing statement:**

1  
2  
3 The authors declare that on request all data files are available for analysis from the  
4  
5 corresponding author at [carley.grimes@deakin.edu.au](mailto:carley.grimes@deakin.edu.au)  
6  
7  
8  
9  
10  
11  
12  
13  
14  
15  
16  
17  
18  
19  
20  
21  
22  
23  
24  
25  
26  
27  
28  
29  
30  
31  
32  
33  
34  
35  
36  
37  
38  
39  
40  
41  
42  
43  
44  
45  
46  
47  
48  
49  
50  
51  
52  
53  
54  
55  
56  
57  
58  
59  
60

For peer review only

1  
2  
3 1 **ABSTRACT**  
4

5  
6 2 **Objective:** To assess the association between socioeconomic status (SES) and dietary sodium  
7  
8 3 intake, and identify if the major dietary sources of sodium differ by socioeconomic group in a  
9  
10 4 nationally representative sample of Australian children.

11  
12  
13 5 **Design:** Cross-sectional survey.  
14

15  
16 6 **Setting:** 2007 Australian National Children's Nutrition and Physical Activity Survey.  
17

18  
19 7 **Participants:** A total of 4487 children aged 2-16 years completed all components of the  
20  
21 8 survey.  
22

23  
24 9 **Primary and secondary outcome measures:** Sodium intake was determined via one 24-hr  
25  
26 10 dietary recall. The population proportion formula was used to identify the major sources of  
27  
28 11 dietary salt. SES was defined by the level of education attained by the primary carer. In  
29  
30 12 addition parental income was used as a secondary indicator of SES.  
31  
32

33  
34 13 **Results:** Dietary sodium intake of children of low SES background was 2576 (SEM 42) mg/d  
35  
36 14 (salt equivalent 6.6 (0.1) g/d) which was greater than children of high SES background 2370  
37  
38 15 (35) mg/d (salt 6.1 (0.09) g/d) ( $P<0.001$ ). After adjustment for age, gender, energy intake  
39  
40 16 and body mass index, low SES children consumed 195 mg/d (salt 0.5 g/d) more sodium than  
41  
42 17 high SES children ( $P<0.001$ ). Low SES children had a greater intake of sodium from  
43  
44 18 processed meat, gravies/sauces, pastries, breakfast cereals, potatoes and potato snacks (all  
45  
46 19  $P<0.05$ ).  
47

48  
49  
50 20 **Conclusion:** Australian children from a low SES background have on average a 9% greater  
51  
52 21 intake of sodium from food sources compared to those from a high SES background.  
53  
54  
55  
56  
57  
58  
59  
60



- 1  
2  
3 22 Understanding the socioeconomic patterning of salt intake during childhood should be  
4  
5 23 considered in interventions to reduce cardiovascular disease.  
6  
7  
8  
9  
10  
11  
12  
13  
14  
15  
16  
17  
18  
19  
20  
21  
22  
23  
24  
25  
26  
27  
28  
29  
30  
31  
32  
33  
34  
35  
36  
37  
38  
39  
40  
41  
42  
43  
44  
45  
46  
47  
48  
49  
50  
51  
52  
53  
54  
55  
56  
57  
58  
59  
60

For peer review only

1  
2  
3 24 **Article summary:**  
4  
5

6 25 **Article focus**  
7  
8

- 9 • To assess the association between socioeconomic status (SES) and dietary sodium intake  
10  
11 in Australian children and adolescents.  
12  
13  
14 • To determine if the major dietary sources of sodium differ by socioeconomic group.  
15  
16

17 29 **Key messages**  
18  
19

- 20 • In Australian children socioeconomic status is inversely associated with dietary sodium  
21  
22 intake.  
23  
24  
25 • Children of low socioeconomic background consumed more sodium from convenience  
26  
27 style foods including pies/sausage rolls; savoury sauces, fried prepared potato; processed  
28  
29 meat and potato crisps.  
30  
31  
32

33 35 **Strengths and limitations of this study**  
34  
35

- 36 • These results are based on a large nationally representative sample of Australian children  
37  
38 and adolescents.  
39  
40  
41 • Sodium intake was determined via a 24-hr dietary recall and therefore does not capture the  
42  
43 amount of sodium derived from salt used at the table or during cooking.  
44  
45

46  
47 The socioeconomic disparity of sodium intake reported in this study is attributable to  
48  
49 differences in sodium intake from food sources only. Further research is required to  
50  
51 understand how SES impacts on raising sodium intake.  
52  
53  
54  
55  
56  
57  
58  
59  
60

## 43 INTRODUCTION

44 As in adults,<sup>(1)</sup> dietary sodium intake is positively associated with blood pressure in  
45 children.<sup>(2, 3)</sup> Comparable to other developed nations,<sup>(4)</sup> dietary sodium intake of Australian  
46 children is high and exceeds dietary recommendations.<sup>(5, 6)</sup> Given blood pressure follows a  
47 tracking pattern over the life course,<sup>(7, 8)</sup> it is likely that high sodium consumption during  
48 childhood increases future risk of adult hypertension and subsequent cardiovascular disease  
49 (CVD). Increased CVD risk is also observed with low SES,<sup>(9, 10)</sup> potentially due in part to  
50 differences in dietary intakes. Furthermore, prolonged inequalities of SES across the life  
51 course are likely to accumulate to overall greater CVD risk,<sup>(11, 12)</sup> A number of studies in  
52 adults<sup>(13-15)</sup> and in children and adolescents<sup>(16-20)</sup> have identified SES as a determinant of diet  
53 quality. For instance, evidence from cross-sectional studies in children and adolescents have  
54 reported a positive association between SES and fruit and vegetable intake<sup>(17, 18, 21)</sup> and  
55 conversely, lower levels of SES have been associated with poor dietary outcomes, including  
56 greater intake of high fat foods,<sup>(20)</sup> fast foods and soft drinks.<sup>(19)</sup> Studies examining the  
57 association between SES and sodium intake are scarce and inconsistent, one study in British  
58 adults found low SES was associated with higher intakes of sodium,<sup>(22)</sup> whereas in US adults  
59 there was no association between SES and sodium intake.<sup>(23)</sup> The aim of this study was to  
60 examine the association between SES and dietary sodium intake and the food sources of  
61 sodium in a nationally representative sample of Australian children aged 2-16 years.

## 63 METHODS

### 64 Study design

1  
2  
3 65 The 2007 Australian Children's Nutrition and Physical Activity Survey (CNPAS) was a  
4  
5 66 cross-sectional survey designed to collect demographic, dietary, anthropometric and physical  
6  
7 67 activity data from a nationally representative sample of children aged 2-16 years. The full  
8  
9 68 details of the sampling methodology can be found elsewhere.<sup>(24)</sup> Briefly, participants were  
10  
11 69 recruited using a multistage quota sampling framework. The initial target quota was 1000  
12  
13 70 participants for each of the following age groups; 2-3, 4-8, 9-13 and 14-16 years (50% boys  
14  
15 71 and 50% girls), to which a 400 booster sample was later provided by the state of South  
16  
17 72 Australia. The primary sampling unit was postcode and clusters of postcodes were randomly  
18  
19 73 selected as stratified by state/territory and by capital city statistical division or rest of  
20  
21 74 state/territory. Randomly selected clusters of postcodes ensured an equal number of  
22  
23 75 participants in each age group, from each of the metro and non-metro areas within each state.  
24  
25 76 Within selected postcodes Random Digit Dialling (RDD) was used to invite eligible  
26  
27 77 households, i.e. those with children aged 2-16 years, to participate in the study. Only one  
28  
29 78 child from each household could participate in the study. The response rate of eligible  
30  
31 79 children was 40%. Due to the non-proportionate nature of the sampling framework each  
32  
33 80 participant was assigned a population weighting which weighted for age, gender and region.  
34  
35 81 The study was approved by the National Health and Medical Research Council registered  
36  
37 82 Ethics Committees of Commonwealth Scientific and Industrial Research Organisation and  
38  
39 83 the University of South Australia. All participants, or where the child was aged <14 years the  
40  
41 84 primary carer, provided written consent.<sup>(24)</sup>  
42  
43  
44  
45  
46  
47  
48  
49  
50

## 51 **Assessments**

52  
53  
54 87 Demographic and food intake data was collected during a face to face computer assisted  
55  
56 88 personal interview (CAPI) completed during February and August 2007. A three-pass 24 h  
57  
58  
59  
60

1  
2  
3  
4  
5  
6  
7  
8  
9  
10  
11  
12  
13  
14  
15  
16  
17  
18  
19  
20  
21  
22  
23  
24  
25  
26  
27  
28  
29  
30  
31  
32  
33  
34  
35  
36  
37  
38  
39  
40  
41  
42  
43  
44  
45  
46  
47  
48  
49  
50  
51  
52  
53  
54  
55  
56  
57  
58  
59  
60

89 dietary recall was used to determine all food and beverages consumed from midnight to  
90 midnight on the day prior to the interview.<sup>(24)</sup> The three pass method includes the following  
91 stages i) provide a quick list of all foods and beverages ii) a series of probe questions relevant  
92 to each quick list item to gather more detailed information on time and place of consumption,  
93 any additions to the food item, portion size and brand name iii) finally, a recall review to  
94 validate information and make any necessary adjustments. Portion sizes were estimated  
95 using a validated food model booklet and standard household measures. To minimise error  
96 after data collection all interviews were reviewed by study dietitians to assess for unrealistic  
97 portion sizes, inadequate detail and typing errors. The primary carer of participants aged 9  
98 years and under provided information on dietary intake.<sup>(24)</sup>

99

100 Sodium intake was calculated using the Australian nutrient composition database  
101 AUSNUT2007, specifically developed by the Food Standards Australia and New Zealand for  
102 the CNPAS.<sup>(25)</sup> A description of the food coding system using in this database has previously  
103 been described.<sup>(26)</sup> Daily sodium (mg) intake was converted to the salt equivalent (g) using  
104 the conversion 1 gram of sodium chloride (salt) = 390 mg sodium. Reported salt intake did  
105 not include salt added at the table or during cooking.

106

#### 107 *Indicator of socioeconomic status*

108 Consistent with other dietary studies in children and adolescents we have used level of  
109 education attained by the primary carer and household income as markers of SES.<sup>(27,28)</sup> The  
110 highest level of education attained by the primary carer was used to define SES. Based on  
111 this participants were grouped into one of three categories of SES; i) high: includes those

1  
2  
3 112 with a university/tertiary qualification ii) mid: includes those with an advanced diploma,  
4  
5 113 diploma or certificate III/IV or trade certificate iii) low: includes those with some or no level  
6  
7 114 of high school education. Parental income was used as a secondary indicator of SES.  
8  
9 115 Reported parental income before tax was grouped into four categories i) AUD\$ 0 to \$31 999  
10  
11 116 ii) \$31 200 to \$51 999 iii) \$52 000 to \$103 999 iv)  $\geq$  \$104 000. Body weight and height were  
12  
13 117 measured using standardised protocols.<sup>(29)</sup> BMI was calculated as body weight (kg) divided  
14  
15 118 by the square of body height (m<sup>2</sup>). Participants were grouped into weight categories (very  
16  
17 119 underweight, underweight, healthy weight, overweight, obese) using the International  
18  
19 120 Obesity Task Force BMI reference cut offs for children.<sup>(30,31)</sup>  
20  
21  
22  
23  
24  
25  
26

## 27 122 **Statistical analysis**

28  
29  
30 123 Statistical analyses were completed using STATA/SE 11 (StataCorp, College Station, Texas  
31  
32 124 USA) and PASW Statistics 17.0 (PASW Inc, Chicago, IL, USA). A *P* value of <0.05 was  
33  
34 125 considered significant. All analyses accounted for the complex survey design using the  
35  
36 126 STATA svy command, specifying strata variable (region), cluster variable (post code) and  
37  
38 127 population weighting (age, gender, region). Descriptive statistics are presented as mean (SD)  
39  
40 128 or n (% weighted). Pearson correlation coefficient was used to assess the association  
41  
42 129 between sodium intake, energy intake and BMI. To assess the association between SES, as  
43  
44 130 defined by primary carer education level, and sodium intake, multiple regression analysis was  
45  
46 131 used with adjustment for age, gender, energy intake and BMI. To further control for the  
47  
48 132 effects of age, the analysis was repeated stratified by age group (i.e. 2-3; 4-8; 9-13; 14-16  
49  
50 133 years). These age categories are consistent with those used in Australian dietary guidelines  
51  
52 134 <sup>(6)</sup>. As income level is sometimes used as a marker of SES <sup>(13)</sup> the association between  
53  
54  
55  
56  
57  
58  
59  
60

1  
2  
3 135 parental income and sodium intake was also examined, with adjustment for age, gender,  
4  
5 136 energy intake and BMI. The regression coefficient ( $\beta$ ) with 95% CI, corresponding  $P$  values  
6  
7 137 and the coefficient of determination ( $R^2$ ) are presented. In a previous analysis<sup>(26)</sup> which  
8  
9 138 included the same study population we used the population proportion formula<sup>(32)</sup> to calculate  
10  
11 139 the contribution of sodium from sub-major food group categories, as defined in the CNPAS  
12  
13 140 food group coding system.<sup>(24)</sup> The population proportion formula<sup>(32)</sup> is outlined below:

14 141 **% of sodium from food group** = [sum of sodium from food group (mg) / total sum of  
15  
16  
17 142 sodium from all foods (mg)] X 100

18  
19  
20  
21  
22  
23 143 For the present study, we have utilised this list which identifies the main sources of dietary  
24  
25 144 sodium, to determine if sodium intake from food group differs between low and high SES  
26  
27 145 categories, based on primary carer education level. To do this, we calculated the mean  
28  
29 146 sodium intake from each sub-major food group by SES category, and compared the mean  
30  
31 147 sodium of low to high SES, using an independent T-test.  
32  
33  
34

35 148

## 36 37 38 149 **RESULTS**

39  
40  
41 150 Basic characteristics of the 4 487 participants are listed in **Table 1**. As defined by parental  
42  
43 151 education status, the proportion of children from low, mid and high SES background was  
44  
45 152 relatively evenly distributed. Over two thirds of children fell within the two highest income  
46  
47 153 bands. There was a significant positive correlation between sodium intake and energy intake  
48  
49 154 ( $r = 0.69$ ,  $P < 0.001$ ) and sodium intake and BMI ( $r = 0.22$ ,  $P < 0.001$ ). Average daily sodium  
50  
51 155 intake differed by SES (**Figure 1**,  $P < 0.01$ ). Regression analysis indicated that low SES was  
52  
53 156 associated with a 195 mg/d (salt 0.5 g/d) greater intake of sodium. The association between  
54  
55  
56  
57  
58  
59  
60

1  
2  
3 157 SES and sodium intake remained after adjustment for age, gender, energy intake and BMI  
4  
5 158 (**Table 2**). When stratified by age group the association between sodium intake and SES  
6  
7 159 remained significant between the ages of 4-13 years (**Table 2**), however there was no  
8  
9  
10 160 association between sodium intake and SES in 2-3 year olds or in 14-16 year olds (data not  
11  
12 161 shown). There was no association between sodium intake and parental income (data not  
13  
14 162 shown), however, only 28% of children fell within the two lowest income bands (**Table 1**)  
15  
16  
17 163  
18  
19  
20 164 **Table 3** lists those sub-major food groups which contributed >1% to the groups' total daily  
21  
22 165 sodium intake. Combined these 23 food groups accounted for 84.5% of total daily sodium  
23  
24 166 intake. Regular breads and bread rolls contributed the most sodium. Moderate sources of  
25  
26 167 sodium, contributing more than 4% of total sodium intake, included mixed dishes where  
27  
28 168 cereal is the major ingredient (e.g. pizza, hamburger, sandwich, savoury rice and noodle  
29  
30 169 based dishes), processed meat, gravies and savoury sauces, pastries, cheese, and breakfast  
31  
32 170 cereals and bars. Compared to children of high SES, children of low SES had a significantly  
33  
34 171 greater intake of sodium from processed meat, gravies and savoury sauce, pastries, breakfast  
35  
36 172 cereals and bars, potatoes and potato snacks (e.g. potato crisps). The percentage difference in  
37  
38 173 sodium intake in each of these categories was 46%, 31%, 24%, 16%, 39% and 46%,  
39  
40 174 respectively (**Table 3**). Conversely, children of high SES background had a significantly  
41  
42 175 greater intake of sodium from the food group containing cakes, buns, muffins, scones, cake-  
43  
44 176 type desserts; and the food group described as batter-based products (e.g. pancakes, picklets).  
45  
46 177 The percentage difference in sodium intake in each of these categories was 16% and 32%,  
47  
48 178 respectively (**Table 3**).  
49  
50  
51  
52  
53  
54 179  
55  
56  
57  
58  
59  
60



1  
2  
3 180 **DISCUSSION**  
4  
5

6 181 In a nationally representative sample of Australian children aged 2-16 years, we found  
7  
8 182 children of low SES background consumed 9% more dietary sodium, from food sources, than  
9  
10 183 those of high SES background. The inverse association between sodium intake and SES was  
11  
12 184 primarily driven by the association in children aged 4-13 years, particularly after adjustment  
13  
14 185 for the important covariates age, gender, energy intake and BMI. In adult studies, low SES  
15  
16 186 has been associated with more frequent consumption of high salt foods, such as soup, sauces,  
17  
18 187 ready to eat meals, savoury seasonings, sausages and potato.<sup>(33, 34)</sup> Given parental control  
19  
20 188 over children's food choices during these years, it is likely that SES disparities in adult food  
21  
22 189 choices relating to high salt foods may filter down into children's eating practices. We found  
23  
24 190 no association between SES and sodium intake in 2-3 and 14-16 year olds. Although some  
25  
26 191 evidence indicates SES disparities in dietary patterns may be present during infancy,<sup>(35)</sup> it is  
27  
28 192 possible such early differences are not seen in dietary patterns with the restricted range of  
29  
30 193 food types. In the case of adolescents, as autonomy over food choices increases, other  
31  
32 194 factors, such as peer-influence, taste and eating away from the home<sup>(36)</sup> may become more  
33  
34 195 prominent determinants of dietary intake.  
35  
36  
37  
38  
39  
40  
41  
42

43 197 Using US National Health and Nutrition Examination Survey (NHANES) data, Mazur et  
44  
45 198 al.<sup>(37)</sup> explored the association of SES, as indicated by head of household education status and  
46  
47 199 household income, on sodium intake in Hispanic children aged 4-16 years. Interestingly, in  
48  
49 200 this study lower levels of education were associated with lower sodium intake<sup>(37)</sup>. This is  
50  
51 201 contrary to our own findings as well as past studies, which generally link lower SES to  
52  
53 202 overall poorer dietary outcomes.<sup>(13)</sup> We found no association between sodium intake and  
54  
55 203 level of income, however low income bands were underrepresented. This is in contrast to the  
56  
57  
58  
59  
60

1  
2  
3 204 findings in Hispanic children, where low household income was associated with a greater  
4  
5 205 intake of dietary sodium.<sup>(37)</sup> In a New Zealand food survey, low cost ‘home brand’ labelled  
6  
7 206 food products were found to contain greater quantities of sodium than the more expensive  
8  
9 207 branded food products.<sup>(38)</sup> The impact of income on sodium intake in Australian children  
10  
11 208 remains unclear and further research is required.  
12  
13

14  
15 209

16  
17  
18 210 Previous studies in children have reported socioeconomic differences in the consumption of  
19  
20 211 certain food groups.<sup>(39, 40)</sup> For example, in European children of low SES background, greater  
21  
22 212 intake of starchy foods, meat products, savoury snacks such as hamburgers, sugar and  
23  
24 213 confectionary, pizza, desserts and soft drinks have been reported.<sup>(39, 40)</sup> In the present study  
25  
26 214 those food groups which were found to contribute more sodium to the diets of low SES  
27  
28 215 children tended to include convenience style foods (i.e. pies/sausage rolls; savoury sauce and  
29  
30 216 casserole base sauces; fried prepared potato; processed meat; potato snacks). Comparably,  
31  
32 217 children of high SES background consumed greater amounts of sodium from cake and baked  
33  
34 218 type products. However, a significant amount of sodium in baked products can be in sodium  
35  
36 219 bicarbonate rather than in the form of sodium chloride. Sodium bicarbonate, unlike sodium  
37  
38 220 chloride, has not been directly associated with adverse blood pressure outcomes.<sup>(41)</sup>  
39  
40  
41  
42

43 221

44  
45  
46 222 With reference to sodium intake data by age group<sup>(5)</sup> and comparison to the recommended  
47  
48 223 daily Upper Limit of sodium<sup>(6)</sup> it is evident that Australian children of all ages across all SES  
49  
50 224 backgrounds are consuming too much dietary sodium. However, for the first time our  
51  
52 225 findings indicate that socioeconomic disparities exist in sodium intake in Australian children  
53  
54 226 aged 9-13 years. To reduce sodium intake in children a comprehensive approach is required,  
55  
56  
57  
58  
59  
60

1  
2  
3 227 firstly targeting food policy, to encourage product reformulation of lower sodium food  
4  
5 228 products across all price ranges within the food supply. Secondly, consumer education and  
6  
7 229 awareness campaigns, that encourage food choices which are based on fresh products with  
8  
9 230 minimal processing; this may require strategies that equip parents with enhanced food  
10  
11 231 preparation skills and knowledge of the 'hidden' salt added to many commonly eaten  
12  
13 232 processed foods. Furthermore, it is apparent that these strategies need to reach lower SES  
14  
15 233 groups.  
16  
17  
18  
19  
20  
21

22 234  
23 235 The major strengths of this study include the use of a large nationally-representative sample  
24  
25 236 of Australian children, with comprehensive and standardised collection of dietary intake.  
26  
27 237 Limitations of the study include the use of a 24-hr dietary recall to assess sodium intake.  
28  
29 238 Firstly, this method fails to capture the amount of salt coming from salt added at the table and  
30  
31 239 during cooking and therefore is likely to underestimate the true value of salt intake.<sup>(42)</sup> The  
32  
33 240 majority (77%) of dietary sodium consumed is from salt added to processed foods, whilst a  
34  
35 241 smaller amount (11%) has been found to be derived from salt added at the table and during  
36  
37 242 cooking.<sup>(43)</sup> In the present study, the higher intake of sodium reported in children from low  
38  
39 243 SES background is attributable to differences in sodium intake from food sources only. In a  
40  
41 244 previous analysis of these data, we found that children from low SES background (33%) were  
42  
43 245 more likely to report adding salt at the table than children from high SES (25%).<sup>(26)</sup> Thus, it  
44  
45 246 is likely that children of low SES background are consuming greater amounts of total daily  
46  
47 247 sodium than reported in the present analysis. Secondly, assessment of sodium intake is  
48  
49 248 limited by the quality of food composition databases, which may not capture the variation in  
50  
51 249 sodium content of different brand products within each food group.<sup>(42, 44)</sup>  
52  
53  
54  
55  
56  
57  
58  
59  
60

250

1  
2  
3 251 In summary, the findings of higher salt intakes from food sources in children of lower SES  
4  
5 252 background, within in a nationally representative sample, provides focus for concern  
6  
7 253 regarding salt related disease across the life course. This socioeconomic patterning of salt  
8  
9 254 intake may in turn influence the SES disparity seen in hypertension and cardiovascular risk in  
10  
11 255 adulthood. To reduce socioeconomic inequalities in health, interventions need to begin early  
12  
13 256 in life and should include product reformulation of lower sodium food products across all  
14  
15 257 price ranges, as well as consumer education and awareness campaigns which reach low SES  
16  
17  
18 258 groups.  
19  
20

21  
22 259

23  
24 260 **Contributorship statement:** The author's responsibilities were as follows – CAG, KJC, LJR  
25  
26 261 and CAN designed research; CAG performed statistical analysis and wrote the manuscript  
27  
28 262 and is guarantor of the paper; LJR, KJC and CAN helped with data interpretation, revision of  
29  
30 263 manuscript and provided significant consultation. All authors have read and approved the  
31  
32 264 final manuscript.  
33  
34

35  
36 265 **Funding Statement:** This work was supported by a post graduate scholarship from the Heart  
37  
38 266 Foundation of Australia PP 08M 4074.  
39  
40

41  
42 267

43  
44  
45 268  
46  
47  
48  
49  
50  
51  
52  
53  
54  
55  
56  
57  
58  
59  
60

**Table 1.** Basic characteristics of Australian children and adolescents aged 2-16 years (n 487)

| Characteristic                   | n or mean | % or SD |
|----------------------------------|-----------|---------|
| Male (n %)                       | 2 249     | 51      |
| Age (years) (mean SD)            | 9.1       | 4.3     |
| Age group (n %)                  |           |         |
| 2-3 years                        | 1071      | 12      |
| 4-8 years                        | 1216      | 34      |
| 9-13 years                       | 1110      | 33      |
| 14-16 years                      | 1090      | 21      |
| Socioeconomic status (n %)*      |           |         |
| Low SES                          | 1414      | 30      |
| Mid SES                          | 1583      | 36      |
| High SES                         | 1490      | 34      |
| Parental income (n %)†           |           |         |
| \$0 to 31 999                    | 500       | 11      |
| \$32 000 to 51 999               | 732       | 17      |
| \$52 000 to 103 999              | 1850      | 42      |
| \$≥104 000                       | 1169      | 30      |
| Weight status (n %)‡             |           |         |
| Underweight                      | 212       | 5       |
| Healthy weight                   | 3267      | 72      |
| Overweight                       | 761       | 17      |
| Obese                            | 247       | 6       |
| Energy (kJ/d) (mean SD)          | 8392      | 3156    |
| Sodium (mg/d) (mean SD)          | 2473      | 1243    |
| Salt equivalent (g/d) (mean SD)§ | 6.3       | 3.1     |

‡ SES as defined by the highest level of education attained by the primary carer

†Participants with missing information for parental income (n=236) excluded

1  
2  
3  
4  
5  
6  
7  
8  
9  
10  
11  
12  
13  
14  
15  
16  
17  
18  
19  
20  
21  
22  
23  
24  
25  
26  
27  
28  
29  
30  
31  
32  
33  
34  
35  
36  
37  
38  
39  
40  
41  
42  
43  
44  
45  
46  
47  
48  
49  
50  
51  
52  
53  
54  
55  
56  
57  
58  
59  
60

‡Weight classification based on the International Obesity Task Force BMI reference cut offs

(30, 31)

§Salt equivalents (i.e. sodium chloride: 1 g = 390 mg sodium)

For peer review only

1  
2  
3 **Figure 1.** Mean sodium intake (mg/d) by socioeconomic group (n = 4487)<sup>†‡</sup>  
4  
5

6 **[JPEG IMAGE ATTACHED]**  
7  
8  
9

10  
11  
12  
13  
14  
15  
16  
17  
18 \* Significantly different from high SES ( $P < 0.001$ )  
19

20  
21 \*\* Significantly different from high SES ( $P < 0.05$ )  
22

23  
24 †SES as defined by the highest level of education attained by the primary carer  
25  
26  
27  
28  
29  
30  
31  
32  
33  
34  
35  
36  
37  
38  
39  
40  
41  
42  
43  
44  
45  
46  
47  
48  
49  
50  
51  
52  
53  
54  
55  
56  
57  
58  
59  
60

1  
2  
3  
4  
5  
6  
7  
8  
9  
10  
11  
12  
13  
14  
15  
16  
17  
18  
19  
20  
21  
22  
23  
24  
25  
26  
27  
28  
29  
30  
31  
32  
33  
34  
35  
36  
37  
38  
39  
40  
41  
42  
43  
44  
45  
46  
47  
48  
49

**Table 2.** Association between socioeconomic status (SES) and dietary sodium intake (390 mg/d) (1 g/d salt) in Australian children and adolescents aged 2-16 years (n 4 487) ¶ †

| Variable             | Total Sample (n=4 487) |         | Age group‡            |         |                       |         |
|----------------------|------------------------|---------|-----------------------|---------|-----------------------|---------|
|                      |                        |         | 4-8 years (n=1 216)   |         | 9-13 years (n=1 110)  |         |
|                      | $\beta$ (95% CI)       | P Value | $\beta$ (95% CI)      | P Value | $\beta$ (95% CI)      | P Value |
| <b>Unadjusted</b>    |                        |         |                       |         |                       |         |
| High SES (reference) |                        |         |                       |         |                       |         |
| Mid SES              | 0.3 (0.03, 0.5)        | 0.03    | 0.2 (-0.1, 0.6)       | 0.17    | 0.2 (-0.2, 0.6)       | 0.319   |
| Low SES              | 0.5 (0.3, 0.8)         | <0.001  | 0.5 (0.1, 1.0)        | 0.02    | 0.5 (-0.02, 1.0)      | 0.06    |
|                      | R <sup>2</sup> =0.004  | <0.01   | R <sup>2</sup> =0.008 | 0.05    | R <sup>2</sup> =0.004 | 0.16    |
| <b>Adjusted§</b>     |                        |         |                       |         |                       |         |



|                      |                      |        |                      |        |                      |        |
|----------------------|----------------------|--------|----------------------|--------|----------------------|--------|
| High SES (reference) |                      |        |                      |        |                      |        |
| Mid SES              | 0.2 (0.01, 0.4)      | 0.04   | 0.2 (-0.1, 0.4)      | 0.13   | 0.2 (-0.2, 0.6)      | 0.23   |
| Low SES              | 0.5 (0.2, 0.7)       | <0.001 | 0.6 (0.2, 0.9)       | 0.001  | 0.6 (0.1, 1.0)       | 0.01   |
|                      | R <sup>2</sup> =0.49 | <0.001 | R <sup>2</sup> =0.37 | <0.001 | R <sup>2</sup> =0.36 | <0.001 |

¶ Dependent variable is sodium intake in units of 390 mg/d (salt equivalent 1 g/d) and independent variable is SES entered as an indicator variable: high SES is the reference category

†SES as defined by the highest level of education attained by the primary carer

‡No association between salt intake and SES in age groups 2-3 years and 14-16 years (models not shown)

§Adjusted for gender, age, energy intake and BMI

**Table 3.** Dietary sources of sodium intake listed by their contribution to intake for the group and mean daily sodium intake by food group, by socioeconomic group¶

| Food group                                           | Total sample<br>(n 4487)                       | SES Group†               |                          |                          | P value‡    |
|------------------------------------------------------|------------------------------------------------|--------------------------|--------------------------|--------------------------|-------------|
|                                                      |                                                | Low (n 1414)             | Mid (n 1583)             | High (n 1490)            |             |
|                                                      | % contribution to total<br>daily sodium intake | Mean sodium<br>(SD) mg/d | Mean sodium<br>(SD) mg/d | Mean sodium<br>(SD) mg/d |             |
| Regular breads and bread rolls                       | 13.4                                           | 340 (315)                | 330 (300)                | 324 (317)                | 0.26        |
| Mixed dishes where cereal is the<br>major ingredient | 8.7                                            | 214 (514)                | 256 (616)                | 172 (445)                | 0.07        |
| <b>Processed meat§</b>                               | <b>7.6</b>                                     | <b>216 (464)</b>         | <b>180 (403)</b>         | <b>168 (368)</b>         | <b>0.02</b> |
| <b>Gravies and savoury sauces□</b>                   | <b>6.5</b>                                     | <b>182 (385)</b>         | <b>166 (395)</b>         | <b>139 (354)</b>         | <b>0.01</b> |
| <b>Pastries¶</b>                                     | <b>4.9</b>                                     | <b>135 (400)</b>         | <b>120 (352)</b>         | <b>109 (345)</b>         | <b>0.03</b> |

|                                                                 |            |                  |                  |                 |             |
|-----------------------------------------------------------------|------------|------------------|------------------|-----------------|-------------|
| Cheese                                                          | 4.6        | 114 (209)        | 110 (190)        | 116 (186)       | 0.80        |
| <b>Breakfast cereals and bars</b>                               | <b>4.2</b> | <b>113 (176)</b> | <b>101 (166)</b> | <b>97 (161)</b> | <b>0.03</b> |
| Dairy milk                                                      | 3.9        | 95 (106)         | 94 (103)         | 100 (98)        | 0.25        |
| Herbs, spices, seasonings and<br>stock cubes                    | 3.7        | 114 (482)        | 75 (246)         | 90 (301)        | 0.31        |
| Sausages, frankfurts and saveloys                               | 2.9        | 79 (259)         | 74 (136)         | 61 (201)        | 0.07        |
| Mixed dishes where poultry/game<br>is the major component       | 2.6        | 79 (268)         | 59 (194)         | 60 (238)        | 0.09        |
| Soup (prepared, ready to eat)                                   | 2.6        | 51 (288)         | 74 (379)         | 65 (282)        | 0.25        |
| English-style muffins, flat breads,<br>and savoury sweet breads | 2.4        | 55 (158)         | 58 (180)         | 67 (181)        | 0.17        |
| <b>Cakes, buns, muffins, scones,</b>                            | <b>2.3</b> | <b>54 (153)</b>  | <b>52 (144)</b>  | <b>68 (176)</b> | <b>0.02</b> |

---

|                                                                 |            |                 |                 |                 |             |
|-----------------------------------------------------------------|------------|-----------------|-----------------|-----------------|-------------|
| <b>cake-type desserts</b>                                       |            |                 |                 |                 |             |
| Savoury biscuits                                                | 2.2        | 49 (136)        | 57 (147)        | 57 (152)        | 0.34        |
| Yeast, yeast, vegetable and meat<br>extracts                    | 2.0        | 47 (117)        | 55 (143)        | 45 (108)        | 0.70        |
| <b>Potatoes</b> ¶ ¶ ¶                                           | <b>1.9</b> | <b>53 (128)</b> | <b>51 (127)</b> | <b>38 (106)</b> | <b>0.01</b> |
| <b>Batter-based products</b> ††                                 | <b>1.7</b> | <b>38 (161)</b> | <b>37 (150)</b> | <b>50 (180)</b> | <b>0.05</b> |
| <b>Potato snacks</b>                                            | <b>1.7</b> | <b>51 (149)</b> | <b>40 (121)</b> | <b>35 (125)</b> | <b>0.03</b> |
| Pasta and pasta products                                        | 1.4        | 35 (142)        | 32 (130)        | 35 (138)        | 0.89        |
| Sweet biscuits                                                  | 1.2        | 29 (64)         | 33 (72)         | 27 (62)         | 0.61        |
| Mixed dishes where beef, veal or<br>lamb is the major component | 1.1        | 32 (175)        | 21 (116)        | 28 (56)         | 0.53        |
| Mature legumes and pulse                                        | 1.0        | 21 (149)        | 21 (137)        | 35 (258)        | 0.12        |

---

1  
2  
3  
4  
5 products and dishes  
6  
7

---

8 ¶ Includes those sub-major food group categories that contribute >1.0% of sodium to daily intake ambiguous  
9

10  
11 †SES as defined by the highest level of education attained by the primary carer  
12

13  
14 ‡Means are compared between low and high SES groups using independent T-test  
15

16  
17 §includes ham, bacon and processed delicatessen meat  
18

19  
20 □includes pasta sauces and casserole bases  
21

22  
23 ¶includes pies and sausage rolls  
24

25  
26 ¶ ¶ includes potato gems and wedges  
27

28  
29 ††includes pancakes and pikelets  
30  
31  
32  
33  
34  
35  
36  
37  
38  
39  
40  
41  
42  
43  
44  
45  
46  
47  
48  
49

1  
2  
3  
4  
5  
6  
7  
8  
9  
10  
11  
12  
13  
14  
15  
16  
17  
18  
19  
20  
21  
22  
23  
24  
25  
26  
27  
28  
29  
30  
31  
32  
33  
34  
35  
36  
37  
38  
39  
40  
41  
42  
43  
44  
45  
46  
47  
48  
49  
50  
51  
52  
53  
54  
55  
56  
57  
58  
59  
60

For peer review only

**REFERENCES**

1. Dickinson BD, Havas S. Reducing the population burden of cardiovascular disease by reducing sodium intake. *Arch Intern Med* 2007;**167**:1460-68.
2. He FJ, MacGregor GA. Importance of Salt in Determining Blood Pressure in Children Meta-Analysis of Controlled Trials. *Hypertension* 2006;**48**:861-69.
3. He FJ, Marrero NM, MacGregor GA. Salt and blood pressure in children and adolescents. *J Hum Hyperten* 2008;**22**:4-11.
4. Brown IJ, Tzoulaki I, Candeias V, et al. Salt intakes around the world: implications for public health. *Int J Epidemiol* 2009;**38**:791-813.
5. Department of Health and Ageing, Australian Food and Grocery Council, Department of Agriculture Fisheries and Forestry. 2007 Australian National Children's Nutrition and Physical Activity Survey - Main Findings. Canberra: Commonwealth of Australia, 2008. Available from:  
[http://www.health.gov.au/internet/main/publishing.nsf/content/66596E8FC68FD1A3CA2574D50027DB86/\\$File/childrens-nut-phys-survey.pdf](http://www.health.gov.au/internet/main/publishing.nsf/content/66596E8FC68FD1A3CA2574D50027DB86/$File/childrens-nut-phys-survey.pdf).
6. National Health and Medical Research Council. Nutrient reference values for Australia and New Zealand. Canberra: Australian Government. Department of Health and Ageing, 2006. Available from:  
[http://www.nhmrc.gov.au/files\\_nhmrc/publications/attachments/n35.pdf](http://www.nhmrc.gov.au/files_nhmrc/publications/attachments/n35.pdf).
7. Chen X, Wang Y. Tracking of blood pressure from childhood to adulthood A systematic review and meta-regression analysis. *Circulation* 2008;**117**:3171-80.
8. Toschke AM, Kohl L, Mansmann U, et al. Meta-analysis of blood pressure tracking from childhood to adulthood and implications for the design of intervention trials. *Acta Paediatrica* 2010;**99**:24-29.

- 1  
2  
3 9. Kaplan GA, Keil JE. Socioeconomic factors and cardiovascular disease: a review of the  
4  
5 literature. *Circulation* 1993;**88**:1973-98.  
6
- 7  
8 10. Rosengren A, Subramanian SV, Islam S, et al. Education and risk for acute myocardial  
9  
10 infarction in 52 high, middle and low-income countries: INTERHEART case-control  
11  
12 study. *Heart* 2009;**95**:2014-22.  
13
- 14 11. Loucks EB, Lynch JW, Pilote L, et al. Life-course socioeconomic position and incidence  
15  
16 of coronary heart disease: the Framingham Offspring Study. *Am J Epidemiol*  
17  
18 2009;**169**:829-36.  
19
- 20 12. Pollitt RA, Rose KM, Kaufman JS. Evaluating the evidence for models of life course  
21  
22 socioeconomic factors and cardiovascular outcomes: a systematic review. *BMC*  
23  
24 *Public Health* 2005;**5**:7.  
25  
26
- 27 13. Darmon N, Drewnowski A. Does social class predict diet quality? *Am J Clin Nutr*  
28  
29 2008;**87**:1107-17.  
30  
31
- 32 14. Giskes K, Turrell G, Patterson C, et al. Socio-economic differences in fruit and vegetable  
33  
34 consumption among Australian adolescents and adults. *Public Health Nutr*  
35  
36 2002;**5**:663-69.  
37
- 38 15. Hulshof KFAM, Brussaard JH, Kruijzinga AG, et al. Socio-economic status, dietary intake  
39  
40 and 10 y trends: the Dutch National Food Consumption Survey. *Eur J Clin Nutr*  
41  
42 2003;**57**:128-37.  
43  
44
- 45 16. Ambrosini GL, Oddy WH, Robinson M, et al. Adolescent dietary patterns are associated  
46  
47 with lifestyle and family psycho-social factors. *Public Health Nutr* 2009;**12**:1807-15.  
48
- 49 17. Haapalahti M, Mykkanen H, Tikkanen S, et al. Meal patterns and food use in 10- to 11-  
50  
51 year old Finnish children. *Public Health Nutr* 2002;**6**:365-70.  
52  
53
- 54 18. Neumark-Sztainer D, Wall M, Perry C, et al. Correlates of fruit and vegetable intake  
55  
56 among adolescents Findings from Project EAT. *Prev Med* 2003;**37**:198-208.  
57  
58



- 1  
2  
3 19. Utter J, Denny S, Crengle S, et al. Socio-economic differences in eating-related attitudes,  
4 behaviours and environments of adolescents. *Public Health Nutr* 2010;**14**:629-34.  
5  
6  
7 20. Wardle J, Jarvis MJ, Steggle N, et al. Socioeconomic disparities in cancer-risk  
8 behaviours in adolescence: baseline results from the Health and Behaviour in  
9 Teenagers Study (HABITS). *Prev Med* 2003;**36**:721-30.  
10  
11  
12 21. Dubois L, Farmer A, Girard M, et al. Demographic and socio-economic factors related to  
13 food intake and adherence to nutritional recommendations in a cohort of pre-school  
14 children. *Public Health Nutr* 2011;**14**:1096-104.  
15  
16  
17 22. Bates CJ, Prentice A, Cole TJ, et al. Micronutrients: highlights and research challenges  
18 from the 1994–5 National Diet and Nutrition Survey of people aged 65 years and  
19 over. *Brit J Nutr* 1999;**82**:7-15.  
20  
21  
22 23. Gerber AM, James SA, Ammerman AS, et al. Socioeconomic status and electrolyte  
23 intake in black adults: the Pitt country Study. *Am J Public Health* 1991;**81**:1608-12.  
24  
25  
26 24. Department of Health and Ageing. User Guide 2007 Australian National Children's  
27 Nutrition and Physical Activity Survey. Canberra: 2010. Available from:  
28 [http://www.health.gov.au/internet/main/publishing.nsf/Content/AC3F256C715674D5](http://www.health.gov.au/internet/main/publishing.nsf/Content/AC3F256C715674D5CA2574D60000237D/$File/user-guide-v2.pdf)  
29 [CA2574D60000237D/\\$File/user-guide-v2.pdf](http://www.health.gov.au/internet/main/publishing.nsf/Content/AC3F256C715674D5CA2574D60000237D/$File/user-guide-v2.pdf).  
30  
31  
32 25. Food Standards Australian and New Zealand [Internet]. Canberra: Food Standards  
33 Australia and New Zealand; [cited 2009 Jan 23]. Available from:  
34 <http://www.foodstandards.gov.au/consumerinformation/ausnut2007/>.  
35  
36  
37 26. Grimes CA, Campbell KJ, Riddell LJ, et al. Sources of sodium in Australian children's  
38 diets and the effect of the application of sodium targets to food products to reduce  
39 sodium intake. *Br J Nutr* 2011;**105**:468-77.  
40  
41  
42 27. Cameron AJ, Ball K, Pearson N, et al. Socioeconomic variation in diet and activity-  
43 related behaviours of Australian children and adolescents  
44  
45  
46  
47  
48  
49  
50  
51  
52  
53  
54  
55  
56  
57  
58  
59  
60

- 1  
2  
3 aged 2–16 years. *Pediatr Obes* 2010;**7**:329-42.
- 4  
5 28. Golley RK, Hendrie GA, McNaughton SA. Scores on the Dietary Guideline Index for  
6  
7 Children and Adolescents Are Associated with Nutrient Intake and Socio-Economic  
8  
9 position but Not Adiposity. *J Nutr* 2011;**141**:1340-7.
- 10  
11 29. Marfell-Jones M, Olds T, Stewart A, et al. International standards for anthropometric  
12  
13 assessment. Potchefstroom, South Africa: International standards for anthropometric  
14  
15 assessment,, 2006. Available from:
- 16  
17 30. Cole TJ. Establishing a standard definition for child overweight and obesity worldwide:  
18  
19 international survey. *Br Med J* 2000;**320**:1-6.
- 20  
21 31. Cole TJ, Flegal KM, Nicholls D, et al. Body mass index cut offs to define thinness in  
22  
23 children and adolescents: international survey. *Brit Med J* 2007;**335**:194-7.
- 24  
25 32. Krebs-Smith SM, Kott PS, Guenther PM. Mean proportion and population proportion:  
26  
27 two answers to the same question? *J Am Diet Assoc* 1989;**89**:667-72.
- 28  
29 33. Purdy J, Armstrong G, McIlveen H. The influence of socio-economic status on salt  
30  
31 consumption in Northern Ireland. *International Journal of Consumer Studies*  
32  
33 2002;**26**:71-80.
- 34  
35 34. Van der Veen JE, Graaf CD, Van Dis SJ, et al. Determinants of salt use in cooked meals  
36  
37 in the Netherlands: attitudes and practices of food preparers. *Eur J Clin Nutr*  
38  
39 1999;**53**:388-94.
- 40  
41 35. Okubo H, Miyake Y, Sasaki S, et al. Dietary patterns in infancy and their associations  
42  
43 with maternal socio-economic and lifestyle factors among 758 Japanese mother–child  
44  
45 pairs: the Osaka Maternal and Child Health Study. *Matern Child Nutr*  
46  
47 2012;**8**:doi:10.1111/j.740-8709.2012.00403.x.
- 48  
49 36. Story M, Neumark-Sztainer D, French S. Individual and environmental influences on  
50  
51 adolescent eating behaviours. *J Am Diet Assoc* 2002;**102**:S40-S51.
- 52  
53  
54  
55  
56  
57  
58  
59  
60

- 1  
2  
3 37. Mazur RE, Marquis GS, Jensen HH. Diet and food insufficiency among Hispanic youths:  
4  
5 acculturation and socioeconomic factors in the third National Health and Nutrition  
6  
7 Examination Survey. *Am J Clin Nutr* 2003;**78**:1120-27.  
8  
9  
10 38. Monro D, Young L, Wilson J, et al. The sodium content of low cost and private label  
11  
12 foods; implications for public health. *Journal of the New Zealand Dietetic Association*  
13  
14 2004;**58**:4-10.  
15  
16 39. Lioret S, Dubuisson C, Dufour A, et al. Trends in food intake in French children from  
17  
18 1999 to 2007: results from the INCA (etude Individuelle Nationale des  
19  
20 Consommations Alimentaires) dietary surveys. *Brit J Nutr* 2010;**103**:585-601.  
21  
22  
23 40. Sausenthaler S, Standl M, Buyken A, et al. Regional and socio-economic differences in  
24  
25 food, nutrient and supplement intake in school-age children in Germany: results from  
26  
27 the GINIplus and the LISApplus studies. *Public Health Nutr* 2011;**10**:1724-35.  
28  
29  
30 41. McCarty MF. Should we restrict chloride rather than sodium? *Med Hypotheses*  
31  
32 2004;**63**:138-48.  
33  
34 42. Loria CM, Obarzanek E, Ernst ND. The Dietary Guidelines: Surveillance Issues and  
35  
36 Research Needs. *Choose and Prepare Foods with Less Salt: Dietary Advice for All*  
37  
38 Americans. *J Nutr* 2001;**131**:536S-51S.  
39  
40  
41 43. Mattes RD, Donnelly D. Relative contributions of dietary sodium sources. *J Am Coll*  
42  
43 *Nutr* 1991;**10**:383-93.  
44  
45  
46 44. World Health Organization. Creating an enabling environment for population-based salt  
47  
48 reduction strategies. United Kingdom: World Health Organization, 2010. Available  
49  
50 from:  
51  
52  
53  
54  
55  
56  
57  
58  
59  
60

1  
2  
3  
4  
5  
6  
7  
8  
9  
10  
11  
12  
13  
14  
15  
16  
17  
18  
19  
20  
21  
22  
23  
24  
25  
26  
27  
28  
29  
30  
31  
32  
33  
34  
35  
36  
37  
38  
39  
40  
41  
42  
43  
44  
45  
46  
47  
48  
49  
50  
51  
52  
53  
54  
55  
56  
57  
58  
59  
60

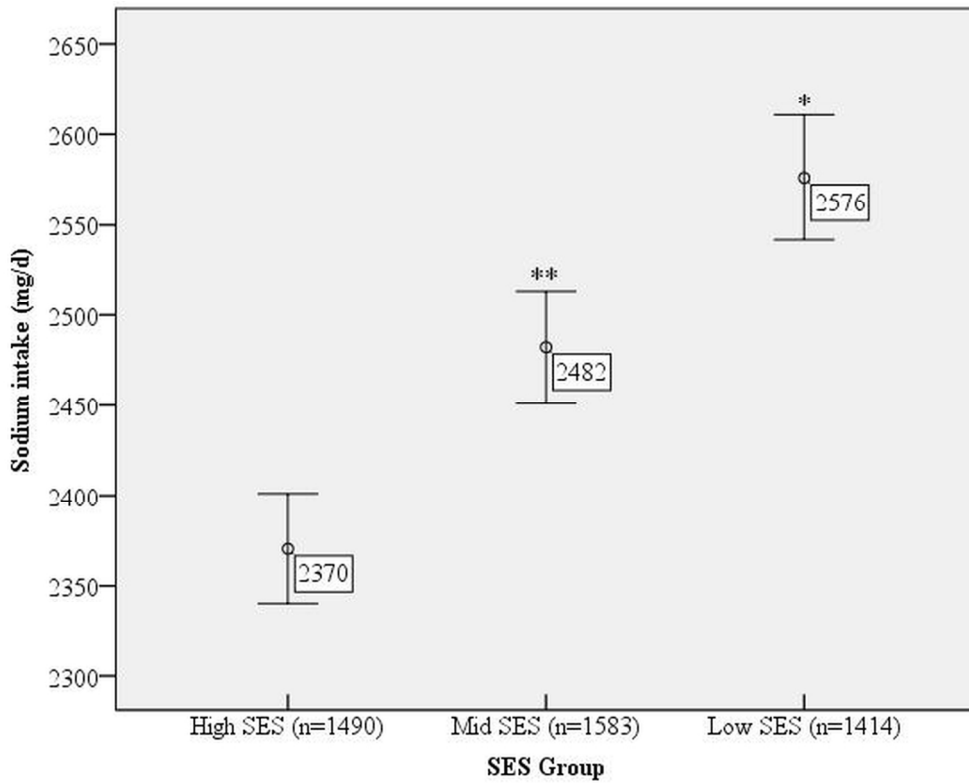

\* Significantly different from high SES (P <0.001)  
\*\* Significantly different from high SES (P <0.05)  
†SES as defined by the highest level of education attained by the primary carer  
112x90mm (300 x 300 DPI)

View only

## STROBE Statement—checklist of items that should be included in reports of observational studies

|                              | Item No | Recommendation                                                                                                                                                                                                                                                                                                                                                                                                                                                                                                                                                                                                                                                                                   |
|------------------------------|---------|--------------------------------------------------------------------------------------------------------------------------------------------------------------------------------------------------------------------------------------------------------------------------------------------------------------------------------------------------------------------------------------------------------------------------------------------------------------------------------------------------------------------------------------------------------------------------------------------------------------------------------------------------------------------------------------------------|
| <b>Title and abstract</b>    | 1       | (a) Indicate the study's design with a commonly used term in the title or the abstract<br>(b) Provide in the abstract an informative and balanced summary of what was done and what was found                                                                                                                                                                                                                                                                                                                                                                                                                                                                                                    |
| <b>Introduction</b>          |         |                                                                                                                                                                                                                                                                                                                                                                                                                                                                                                                                                                                                                                                                                                  |
| Background/rationale         | 2       | Explain the scientific background and rationale for the investigation being reported                                                                                                                                                                                                                                                                                                                                                                                                                                                                                                                                                                                                             |
| Objectives                   | 3       | State specific objectives, including any prespecified hypotheses                                                                                                                                                                                                                                                                                                                                                                                                                                                                                                                                                                                                                                 |
| <b>Methods</b>               |         |                                                                                                                                                                                                                                                                                                                                                                                                                                                                                                                                                                                                                                                                                                  |
| Study design                 | 4       | Present key elements of study design early in the paper                                                                                                                                                                                                                                                                                                                                                                                                                                                                                                                                                                                                                                          |
| Setting                      | 5       | Describe the setting, locations, and relevant dates, including periods of recruitment, exposure, follow-up, and data collection                                                                                                                                                                                                                                                                                                                                                                                                                                                                                                                                                                  |
| Participants                 | 6       | (a) <i>Cohort study</i> —Give the eligibility criteria, and the sources and methods of selection of participants. Describe methods of follow-up<br><i>Case-control study</i> —Give the eligibility criteria, and the sources and methods of case ascertainment and control selection. Give the rationale for the choice of cases and controls<br><i>Cross-sectional study</i> —Give the eligibility criteria, and the sources and methods of selection of participants<br>(b) <i>Cohort study</i> —For matched studies, give matching criteria and number of exposed and unexposed<br><i>Case-control study</i> —For matched studies, give matching criteria and the number of controls per case |
| Variables                    | 7       | Clearly define all outcomes, exposures, predictors, potential confounders, and effect modifiers. Give diagnostic criteria, if applicable                                                                                                                                                                                                                                                                                                                                                                                                                                                                                                                                                         |
| Data sources/<br>measurement | 8*      | For each variable of interest, give sources of data and details of methods of assessment (measurement). Describe comparability of assessment methods if there is more than one group                                                                                                                                                                                                                                                                                                                                                                                                                                                                                                             |
| Bias                         | 9       | Describe any efforts to address potential sources of bias                                                                                                                                                                                                                                                                                                                                                                                                                                                                                                                                                                                                                                        |
| Study size                   | 10      | Explain how the study size was arrived at                                                                                                                                                                                                                                                                                                                                                                                                                                                                                                                                                                                                                                                        |
| Quantitative variables       | 11      | Explain how quantitative variables were handled in the analyses. If applicable, describe which groupings were chosen and why                                                                                                                                                                                                                                                                                                                                                                                                                                                                                                                                                                     |
| Statistical methods          | 12      | (a) Describe all statistical methods, including those used to control for confounding<br>(b) Describe any methods used to examine subgroups and interactions<br>(c) Explain how missing data were addressed<br>(d) <i>Cohort study</i> —If applicable, explain how loss to follow-up was addressed<br><i>Case-control study</i> —If applicable, explain how matching of cases and controls was addressed<br><i>Cross-sectional study</i> —If applicable, describe analytical methods taking account of sampling strategy<br>(e) Describe any sensitivity analyses                                                                                                                                |

Continued on next page

1  
2  
3  
4  
5  
6  
7  
8  
9  
10  
11  
12  
13  
14  
15  
16  
17  
18  
19  
20  
21  
22  
23  
24  
25  
26  
27  
28  
29  
30  
31  
32  
33  
34  
35  
36  
37  
38  
39  
40  
41  
42  
43  
44  
45  
46  
47  
48  
49  
50  
51  
52  
53  
54  
55  
56  
57  
58  
59  
60**Results**

|                  |     |                                                                                                                                                                                                                                                                                                                                                                                                               |
|------------------|-----|---------------------------------------------------------------------------------------------------------------------------------------------------------------------------------------------------------------------------------------------------------------------------------------------------------------------------------------------------------------------------------------------------------------|
| Participants     | 13* | (a) Report numbers of individuals at each stage of study—eg numbers potentially eligible, examined for eligibility, confirmed eligible, included in the study, completing follow-up, and analysed<br>(b) Give reasons for non-participation at each stage<br>(c) Consider use of a flow diagram                                                                                                               |
| Descriptive data | 14* | (a) Give characteristics of study participants (eg demographic, clinical, social) and information on exposures and potential confounders<br>(b) Indicate number of participants with missing data for each variable of interest<br>(c) <i>Cohort study</i> —Summarise follow-up time (eg, average and total amount)                                                                                           |
| Outcome data     | 15* | <i>Cohort study</i> —Report numbers of outcome events or summary measures over time<br><i>Case-control study</i> —Report numbers in each exposure category, or summary measures of exposure<br><i>Cross-sectional study</i> —Report numbers of outcome events or summary measures                                                                                                                             |
| Main results     | 16  | (a) Give unadjusted estimates and, if applicable, confounder-adjusted estimates and their precision (eg, 95% confidence interval). Make clear which confounders were adjusted for and why they were included<br>(b) Report category boundaries when continuous variables were categorized<br>(c) If relevant, consider translating estimates of relative risk into absolute risk for a meaningful time period |
| Other analyses   | 17  | Report other analyses done—eg analyses of subgroups and interactions, and sensitivity analyses                                                                                                                                                                                                                                                                                                                |

**Discussion**

|                  |    |                                                                                                                                                                            |
|------------------|----|----------------------------------------------------------------------------------------------------------------------------------------------------------------------------|
| Key results      | 18 | Summarise key results with reference to study objectives                                                                                                                   |
| Limitations      | 19 | Discuss limitations of the study, taking into account sources of potential bias or imprecision. Discuss both direction and magnitude of any potential bias                 |
| Interpretation   | 20 | Give a cautious overall interpretation of results considering objectives, limitations, multiplicity of analyses, results from similar studies, and other relevant evidence |
| Generalisability | 21 | Discuss the generalisability (external validity) of the study results                                                                                                      |

**Other information**

|         |    |                                                                                                                                                               |
|---------|----|---------------------------------------------------------------------------------------------------------------------------------------------------------------|
| Funding | 22 | Give the source of funding and the role of the funders for the present study and, if applicable, for the original study on which the present article is based |
|---------|----|---------------------------------------------------------------------------------------------------------------------------------------------------------------|

\*Give information separately for cases and controls in case-control studies and, if applicable, for exposed and unexposed groups in cohort and cross-sectional studies.

**Note:** An Explanation and Elaboration article discusses each checklist item and gives methodological background and published examples of transparent reporting. The STROBE checklist is best used in conjunction with this article (freely available on the Web sites of PLoS Medicine at <http://www.plosmedicine.org/>, Annals of Internal Medicine at <http://www.annals.org/>, and Epidemiology at <http://www.epidem.com/>). Information on the STROBE Initiative is available at [www.strobe-statement.org](http://www.strobe-statement.org).
